1 **Modeling miRNA-driven post-transcriptional regulatory**  
2 **signals by using exon-intron split analysis (EISA) in pigs**

3

4 Emilio Mármol-Sánchez<sup>1\*</sup>, Susanna Cirera<sup>2</sup>, Laura M. Zingaretti<sup>3</sup>, Mette Juul Jacobsen<sup>2</sup>,  
5 Yuliaxis Ramayo-Caldas<sup>4</sup>, Claus B. Jørgensen<sup>2</sup>, Merete Fredholm<sup>2</sup>, Tainã Figueiredo  
6 Cardoso<sup>1†</sup>, Raquel Quintanilla<sup>4</sup>, Marcel Amills<sup>1,5</sup>

7

8 <sup>1</sup>Centre for Research in Agricultural Genomics (CRAG), CSIC-IRTA-UAB-UB,  
9 Universitat Autònoma de Barcelona, 08193 Bellaterra, Spain.

10 <sup>2</sup>Department of Veterinary and Animal Sciences, Faculty of Health and Medical  
11 Sciences, University of Copenhagen, 1871 Frederiksberg C, Denmark.

12 <sup>3</sup>Universidad Nacional de Villa María, Villa María, Córdoba, Argentina.

13 <sup>4</sup>Animal Breeding and Genetics Program, Institute for Research and Technology in  
14 Food and Agriculture (IRTA), Torre Marimon, 08140 Caldes de Montbui, Spain.

15 <sup>5</sup>Departament de Ciència Animal i dels Aliments, Universitat Autònoma de Barcelona,  
16 08193 Bellaterra, Barcelona, Spain.

17

18 \*Emilio Mármol-Sánchez current address: Stockholm University, The Wenner-Gren  
19 Institute, Department of Molecular Biosciences, SciLifelab.

20 †Tainã Figueiredo Cardoso current address: Embrapa Pecuária Sudeste, Empresa  
21 Brasileira de Pesquisa Agropecuária (EMBRAPA), 13560-970, São Carlos, SP, Brazil.

22

23 **Corresponding author:** Emilio Mármol-Sánchez. Stockholm University, The Wenner-  
24 Gren Institute, Department of Molecular Biosciences, SciLifelab. Email:  
25 [emilio.marmol.sanchez@gmail.com](mailto:emilio.marmol.sanchez@gmail.com)

## 26 **Abstract**

27 Bulk sequencing of RNA transcripts has typically been used to quantify gene expression  
28 levels and regulatory signals in different experimental systems. However, linking  
29 differentially expressed (DE) mRNA transcripts to gene expression regulators, such as  
30 miRNAs, remains challenging, as miRNA-mRNA interactions are commonly identified  
31 *post hoc* after selecting sets of genes of interest, thus biasing the interpretation of  
32 underlying gene regulatory networks.

33 In this study, we aimed at disentangling miRNA-driven post-transcriptional signals  
34 linked to porcine muscle and adipose tissue energy homeostasis. To this end, we  
35 performed an exon-intron split analysis (EISA) to muscle and fat RNA-seq data from  
36 two Duroc pig populations. One of these populations was subjected to fasting-feeding  
37 conditions, while the other one represented divergent fatness profiles. After running  
38 EISA, protein-coding mRNA genes with downregulated exonic fractions and high post-  
39 transcriptional signals were significantly enriched for binding sites of DE upregulated  
40 miRNAs. Moreover, these downregulated genes showed an increased expression  
41 covariation for the exonic fraction compared to that of the intronic fraction. On the  
42 contrary, they did not show enrichment for binding sites of non-DE highly expressed or  
43 downregulated DE miRNAs. Among the set of loci displaying miRNA-driven post-  
44 transcriptional regulatory signals, we observed genes related to glucose homeostasis  
45 (*DKK2*, *PDK4*, *IL18*, *NR4A3*, *CHRNA1*, *TET2*), cell differentiation (*PBX1*, *BACH2*) or  
46 adipocytes metabolism (*SESN3*, *ESRRG*, *SAMD4*, *LEP*, *PTGFR*, *SERPINE2*, *RNF157*,  
47 *GPLD1*, *NCF2*, *OSBPL10*, *PRSS23*). Our results highlighted mRNA genes showing  
48 post-transcriptional miRNA-driven downregulation by using exonic and intronic  
49 fractions of RNA-seq datasets from muscle and adipose tissues in pigs.

50 **Keywords:** Exon-intron split analyses, microRNA, pigs, energy homeostasis.

## 51 **1. Introduction**

52 Messenger RNA (mRNA) expression and turnover in the cell metabolism are subjected  
53 to complex yet poorly characterized regulatory mechanisms that contribute to shaping  
54 fine-tuned biological responses to different stimuli [1]. Cellular metabolic changes are  
55 hence a direct manifestation of intricate interactions between expressed transcripts and  
56 other regulatory elements that modify their abundance, localization, fate and  
57 degradation rate. MicroRNAs (miRNAs) are primarily engaged in the post-  
58 transcriptional control of gene expression through inhibition of translation and/or  
59 destabilization of target mRNAs by poly(A) shortening and subsequent degradation [2].  
60 Changes in the abundance of mRNAs targeted by miRNAs can be inferred through the  
61 analysis of covariation patterns. Such approach can help to unravel direct or indirect  
62 molecular interactions connecting and regulating biological pathways.

63 In order to disentangle regulatory functions driven by miRNAs, researchers typically  
64 focus on specific sets of genes of their interest showing significant expression changes  
65 and harboring binding sites for DE miRNAs [3–9]. This approach, however, is biased  
66 by the fact that genes are selected after differential expression analysis and also by the  
67 performance of an *ad hoc* search of predicted interactions between the 3'-UTRs of  
68 mRNAs and the seed regions of miRNAs. Besides, one of the main limitations of  
69 differential expression analysis is that it does not discriminate whether changes in  
70 expression take place either at the transcriptional or post-transcriptional levels. Such  
71 distinction is essential to understand at which level or levels of the mRNA life cycle the  
72 regulation is taking place.

73 To address this issue, Gaidatzis *et al.* [10] devised a methodology denominated as exon-  
74 intro split analysis (EISA), which separates the transcriptional and post-transcriptional  
75 components of gene regulation by considering that intronic reads are mainly derived

76 from heterogeneous nuclear RNAs (unprocessed mRNAs or pre-mRNAs) and  
77 consequently represent the magnitude of the transcriptional component. Such  
78 assumption is based on early reports describing intronic expression as a proxy of  
79 nascent transcription and co-transcriptional splicing events [11–13].

80 On the other hand, Gaidatzis *et al.* [10] proposed that the magnitude of the post-  
81 transcriptional component can be deduced by comparing the amounts of exonic and  
82 intronic reads [10]. For instance, if a gene shows similar levels of intronic reads in two  
83 different states but a strong downregulation of exonic reads after applying a certain  
84 treatment or challenge (nutrition, infection, temperature etc.), this could be indicative of  
85 an induced inhibition by a post-transcriptional regulatory factor [10,14,15].

86 A high number of differential expression studies have been performed in pigs during the  
87 last decade [16–24], but to the best of our knowledge in none of these studies the  
88 transcriptional and post-transcriptional components of gene regulation have been  
89 discriminated. In the present study, we aimed to dissect the contribution of miRNAs to  
90 post-transcriptional regulation in pigs by using the EISA methodology. To do so, we  
91 have used two different experimental models, i.e., muscle samples from Duroc pigs  
92 before and after food intake and adipose tissue samples from Duroc-Göttingen minipigs  
93 with divergent fatness profiles.

94

95

## 96 **2. Materials and methods**

### 97 **2.1. Experimental design, sampling and processing**

98 The contribution of miRNAs to post-transcriptional regulation in pigs has been  
99 investigated in two different experimental systems:

100 (i) Duroc pigs: Twenty-three gilts divided in two fasting/feeding regimes, i.e. 11 gilts  
101 (*AL-T0*) slaughtered in fasting conditions and 12 gilts (*AL-T2*) slaughtered immediately  
102 after 7 h with access to *ad libitum* feed intake [7,22,25]. Immediately after slaughtering,  
103 *gluteus medius* (GM) skeletal muscle samples were collected and snap-frozen at -80°C.  
104 (ii) Duroc-Göttingen minipig F<sub>2</sub> inter-cross: Ten individuals with divergent fatness  
105 profiles for their body mass index (BMI) metric (5 *lean* and 5 *obese*) were selected from  
106 the UNIK resource population [26,27], as described in Jacobsen et al. 2019 [28]. Tissue  
107 samples from retroperitoneal tissue of each animal were collected and mature  
108 adipocytes were isolated following the protocol of Decaunes et al. 2011 [29] with  
109 modifications reported in [28].  
110 Further details about RNA-seq and small RNA-seq expression data generated from both  
111 experimental designs have been previously described [7,22,28]. In brief, total RNA was  
112 isolated from GM tissue using the RiboPure kit (Ambion, Austin, TX). Total RNA was  
113 also isolated from adipocytes following the protocol of Cirera 2013 [30]. Sequencing  
114 libraries were prepared with dedicated TruSeq stranded total RNA kits (Illumina Inc.  
115 CA) [7,28] and paired-end sequenced in a HiSeq 2000 equipment (Illumina Inc. CA).  
116 Small RNA-specific libraries were prepared from total RNA isolates by using the  
117 TruSeq Small RNA Sample Preparation Kit (Illumina Inc., CA). Single-end (1 x 50 bp)  
118 sequencing of the small RNA fraction was carried out in a HiSeq 2500 equipment  
119 (Illumina Inc., CA).  
120 Sequencing reads generated in the RNA-Seq and small RNA-Seq experiments  
121 concerning fast and fed Duroc gilts, as well as lean and obese Duroc-Göttingen  
122 minipigs, were trimmed to remove any remaining sequencing adapters with the  
123 Cutadapt software [31]. Reads were mapped against the Sscrofa11.1 porcine assembly  
124 [32] with the HISAT2 aligner [33] and default parameters for RNA-Seq reads. In

125 contrast, the Bowtie Alignment v.1.2.1.1 software [34] with small sequence reads  
126 specifications (*bowtie -n 0 -l 25 -m 20 -k 1 --best --strata*) was used to align small RNA-  
127 Seq reads to the Sscrofa11.1 porcine reference assembly [32].

128

## 129 **2.2. Exon/Intron quantification**

130 We generated exonic and intronic-specific annotations spanning all genes available  
131 using the gtf formatted Sscrofa.11.1 v.103 gene annotation file retrieved from Ensembl  
132 repositories ([http://ftp.ensembl.org/pub/release-103/gtf/sus\\_scrofa/](http://ftp.ensembl.org/pub/release-103/gtf/sus_scrofa/)). Overlapping  
133 intronic/exonic regions, as well as singleton positions were removed [35]. Each intronic  
134 region was trimmed by removing 10 nucleotides in both sides to avoid exonic reads  
135 mapping close to exon/intron junctions. We then used the featureCounts function  
136 included in the Rsubread package [36] to quantify gene expression profiles based on  
137 exonic and intron expression patterns for each gene, independently. MiRNA expression  
138 profiles were estimated using the Sscrofa11.1 v.103 mature miRNA annotation with the  
139 featureCounts software tool [37] in single-end mode and with default parameters.

140

## 141 **2.3. Exon/intron split analysis (EISA).**

142 We applied EISA to differentiate gene expression regulation based on post-  
143 transcriptional effects [10,14,15]. To this end, we separately estimated the exonic and  
144 intronic abundance of each annotated mRNA gene using the Sscrofa11.1 v.103  
145 exon/intron custom annotation generated as described in the previous section. Only  
146 genes showing average expression values above 1 count-per-million (CPM) in at least  
147 50% of animals were retained for further analyses.

148 Normalization was performed independently for exon and intron counts by multiplying  
149 each  $i^{th}$  gene expression in each  $j^{th}$  sample by the corresponding mean gene expression

150 and dividing by the total number of quantified counts per sample [10]. Exonic and  
151 intronic gene abundances were subsequently transformed to a  $\log_2$  scale, adding a  
152 pseudo-count of 1 and averaged within each considered treatment groups (*AL-T0* and  
153 *AL-T2* for GM tissues and *lean* and *obese* for adipocyte isolates).  
154 Only genes with successful exonic and intronic quantified read counts were considered  
155 in our analyses. The transcriptional component (Tc) contribution to the observed  
156 differences in each  $i^{th}$  gene was expressed as the increment of intronic counts in fed  
157 (*AL-T2*) and *obese* animals with respect to fasting (*AL-T0*) and *lean* animals ( $\Delta Int = Int_{2i}$   
158  $- Int_{1i}$ ), respectively. The increment of exonic counts ( $\Delta Ex$ ) was also calculated, and the  
159 post-transcriptional component (PTc) effect was expressed as  $\Delta Ex - \Delta Int = (Ex_{2i} - Ex_{1i})$   
160  $- (Int_{2i} - Int_{1i})$ . Both components were z-scored to represent comparable ranges between  
161  $\Delta Ex$  and  $\Delta Int$  estimates. All implemented analyses have been summarized in **Fig. S1**. A  
162 ready-to-use modular pipeline for running EISA is publicly available at  
163 <https://github.com/emarmolsanchez/EISACompR>.

164

#### 165 **2.4. Post-transcriptional signal prioritization**

166 In order to obtain a prioritized list of genes showing relevant signals of post-  
167 transcriptional regulation, the top 5% genes with the highest negative PTc scores were  
168 retrieved. We only focused on genes showing strongly reduced exonic fraction ( $\Delta Ex$ )  
169 values of at least 2-folds for post-transcriptional signals in *AL-T0* vs *AL-T2* and in *lean*  
170 vs *obese* animals.

171

#### 172 **2.5. Differential expression analyses and significance of PTc scores**

173 Differential expression analyses were carried out with the *edgeR* package [38] by  
174 considering the exonic fraction of mRNAs, as well as miRNA expression profiles from

175 RNA-Seq and small RNA-Seq data sets corresponding to the two experimental systems  
176 under study. Expression filtered raw counts for exonic reads were normalized with the  
177 trimmed mean of M-values normalization (TMM) method [39] and the statistical  
178 significance of mean expression differences was tested with a quasi-likelihood F-test  
179 [38]. Correction for multiple hypothesis testing was implemented with the Benjamini-  
180 Hochberg false discovery rate approach [40]. Messenger RNAs were considered as  
181 differentially expressed (DE) when the absolute value of the fold-change (FC) was  
182 higher than 2 ( $|\text{FC}| > 2$ ) and  $q$ -value  $< 0.05$ . For miRNAs,  $|\text{FC}| > 1.5$  and  $q$ -value  $< 0.05$   
183 were used instead. The statistical significance of the post-transcriptional (PTc)  
184 component was evaluated by incorporating the intronic quantification as an interaction  
185 effect for exonic abundances [10].

186

## 187 **2.6. miRNA target prediction**

188 Putative interactions between the seed regions of expressed miRNAs (small RNA-seq  
189 datasets) and the 3'-UTRs of expressed protein-coding mRNA genes (RNA-seq  
190 datasets) were predicted on the basis of sequence identity using the Sscrofa11.1  
191 reference assembly. The annotated 3'-UTRs from porcine mRNAs were retrieved from  
192 the Sscrofa11.1 v.103 available at BioMart (<http://www.ensembl.org/biomart>) and  
193 miRBase [41] databases. The 3'-UTR sequences shorter than 30 nts were discarded.  
194 Redundant seeds from mature porcine microRNAs were removed. The seedVicious  
195 v1.1 tool [42] was used to infer miRNA-mRNA interactions. MiRNA-mRNA 8mer,  
196 7mer-m8 and 7mer-A1 interactions were considered as the most relevant among the full  
197 set of canonical and non-canonical interactions [2,43,44].  
198 Following early reports about the relationship between miRNA binding site context and  
199 miRNA-mRNA interaction efficacy [43], the *in silico*-predicted miRNA-mRNA



200 interactions matching any of the following criteria were removed: (i) Binding sites are  
201 located in 3'-UTRs at less than 15 nts close to the end of the open reading frame (and  
202 the stop codon) or less than 15 nts close to the terminal poly(A) tail, (ii) binding sites  
203 are located in the middle of the 3'-UTR in a range comprising 45-55% of the central  
204 region of the non-coding sequence and (iii) binding sites lack AU-rich elements in their  
205 immediate upstream and downstream flanking regions comprising 30 nts each.

206 Covariation patterns between miRNAs and their predicted mRNA targets were assessed  
207 by computing Spearman's correlation coefficients ( $\rho$ ) with the TMM normalized and  
208  $\log_2$  transformed expression profiles of the exonic fractions of mRNA and miRNA  
209 genes. To determine the contribution of miRNAs to post-transcriptional regulation in  
210 the two experimental systems under study, only miRNA-mRNA predicted pairs  
211 comprising DE upregulated miRNAs ( $FC > 1.5$ ;  $q$ -value  $< 0.05$ ) and mRNA genes with  
212 relevant PTC scores (see post-transcriptional signal prioritization section) were taken  
213 into consideration.

214

## 215 **2.7. miRNA target enrichment analyses**

216 We sought to determine if the overall number of mRNA genes with high post-  
217 transcriptional signals (the ones with the top 5% negative PTC scores and reduced  $\Delta Ex$   
218 values  $> 2$ -folds) were significantly enriched to be targeted by at least one upregulated  
219 miRNA ( $FC > 1.5$ ;  $q$ -value  $< 0.05$ ), compared with the whole set expressed mRNAs  
220 genes with available 3'-UTRs from both *AL-T0* vs *AL-T2* and *lean* vs *obese* datasets.  
221 Enrichment analyses were carried out using the Fisher's exact test implemented in the  
222 *fisher.test* R function. Results were considered significant when the nominal  $P$ -value  $<$   
223 0.05.

224 We also tested whether these genes were enriched for binding sites of the top 5% most  
225 highly expressed miRNA genes, excluding significantly upregulated miRNAs, as well  
226 as for binding sites of significantly downregulated miRNAs ( $FC < -1.5$ ;  $q$ -value  $< 0.05$ ).  
227 Given the relatively low statistical significance of DE miRNAs observed in the UNIK  
228 Duroc-Göttingen minipigs (*lean* vs *obese*), we considered that miRNAs were  
229 significantly upregulated in this particular data set when  $FC > 1.5$  and  $P$ -value  $< 0.01$ .  
230 Further details can be found in **Supplementary Methods File S1**.

231

## 232 **2.8. Gene covariation network and covariation enrichment score**

233 We computed pairwise correlation coefficients among the whole set of DE mRNA  
234 genes in the *AL-T0* vs *AL-T2* ( $q$ -value  $< 0.05$ ,  $N = 454$ ) and *lean* vs *obese* ( $q$ -value  $<$   
235  $0.05$ ,  $N = 299$ ) experimental contrasts. These correlations were compared with those  
236 corresponding to the set of genes with relevant post-transcriptional signals and  
237 putatively targeted by DE upregulated miRNAs. Normalized exonic and intronic  
238 estimates in the  $\log_2$  scale obtained from EISA analyses were used to compute  
239 Spearman's correlation coefficients ( $\rho$ ) for each potential pair of DE mRNA genes plus  
240 those with post-transcriptional signals but without significant DE. Self-correlation pairs  
241 were excluded. Significant covariation events were identified with the Partial  
242 Correlation with Information Theory (PCIT) network inference algorithm [45]  
243 implemented in the *pcit* R package [46]. Non-significant covarying pairs were set to  
244 zero, while a value of 1 was assigned to significant covarying pairs with both positive or  
245 negative coefficients  $|\rho| > 0.6$ .

246 The potential contribution of miRNAs to shape the observed covariation patterns was  
247 assessed by calculating a covariation enrichment score (CES) following Tarbier et al.  
248 2020 [47]. Significant differences among the set of exonic, intronic and control CES

249 values were tested with a non-parametric approach using a Mann-Whitney U non-  
250 parametric test [48]. Further details about CES calculation and implementation can be  
251 found in **Supplementary Methods File S1**.

252

## 253 **2.9. Estimating the expression levels of miRNAs and several of their predicted** 254 **mRNA targets by qPCR**

255 Retroperitoneal adipose tissue (~20 ml) was taken from the abdominal cavity of UNIK  
256 intercrossed Duroc-Göttingen minipigs pigs quickly after slaughtering (more details  
257 about UNIK minipig population are described in [26,27]). Adipocyte cells from adipose  
258 tissue were isolated as described in Jacobsen et al. 2019 [28] and RNA was extracted  
259 following the method of Cirera (2013) [30]. Total RNA from adipocytes was  
260 subsequently employed for cDNA synthesis and qPCR experiments. Five mRNAs (*LEP*,  
261 *OSBLP10*, *PRSS23*, *RNF157* and *SERPINE2*) among the top 5% negative PTc scores  
262 and showing at least 2-foldss reduction in their  $\Delta Ex$  values were selected for qPCR  
263 profiling. Two reference genes (*TBP* and *ACTB*, as defined by Nygard et al. 2007 [49])  
264 were used for normalization. Accordingly, three of the most DE miRNAs were selected  
265 for qPCR profiling (ssc-miR-92b-3p, ssc-miR-148a-3p and ssc-miR-214-3p), plus two  
266 non-DE miRNAs for normalization among the most highly expressed in the *lean* vs  
267 *obese* small RNA-Seq data set (ssc-let-7a and ssc-miR-23a-3p). Further details about  
268 qPCR experimental procedures are available in **Supplementary Methods File S1**. All  
269 primers for mRNA and miRNA expression profiling are available at **Table S2**. Raw Cq  
270 values for each assay are available at **Table S3**.

271

272

273

## 274 **3. Results**

### 275 **3.1. The analysis of post-transcriptional regulation in muscle samples from fasting** 276 **and fed Duroc gilts**

#### 277 Identification of genes predicted to be post-transcriptionally regulated by miRNAs

278 After the processing, mapping and quantification of mRNA and miRNA expression  
279 levels in GM skeletal muscle samples encompassing 11 fasting (*AL-T0*) and 12 fed (*AL-*  
280 *T2*) Duroc gilts, an average of 45.2 million reads per sample (~93%) were successfully  
281 mapped to genes annotated in the Sscrofa11.1 v.103 assembly (N = 31,908, including  
282 protein coding and non-coding genes). Besides, an average of 2.2 million reads per  
283 sample (~42%) mapped to annotated porcine miRNA genes (N = 370).

284 A total of 30,322 (based on exonic reads) and 22,769 (based on intronic reads) genes  
285 were successfully quantified after splitting the reference Sscrofa11.1 v.103 assembly  
286 between exonic and intronic ranges. The exonic fraction displayed an average of  
287 1,923.94 estimated counts per gene, whereas the intronic fraction showed an average of  
288 83.02 counts per gene. In other words, exonic counts were ~23 fold more abundant than  
289 those corresponding to intronic regions. The fasting group (*AL-T0*) was considered to be  
290 the baseline control, i.e., any given upregulation in  $\Delta\text{Ex}$  or  $\Delta\text{Int}$  values represents and  
291 overexpression in fed (*AL-T2*) Duroc gilts with regard to their fasting (*AL-T0*)  
292 counterparts. Finally, PTC scores were obtained from z-scored values of  $\Delta\text{Ex} - \Delta\text{Int}$   
293 estimates and differential expression analyses based on exonic fractions were carried  
294 out using the set of 9,492 genes mentioned before.

295 Differential expression analyses based on exonic fractions identified 454 DE genes (*q*-  
296 value < 0.05). Among those, only genes with  $|\text{FC}| > 2$  were retained, making a total of  
297 52 upregulated and 80 downregulated genes (**Table S4, Fig. S2A**). Besides, differential  
298 expression analyses on small RNA-seq data for *AL-T0* vs *AL-T2* pigs revealed 16 DE

299 miRNAs ( $|FC| > 1.5$ ;  $q$ -value  $< 0.05$ ), of which 8 were upregulated (representing 6  
300 unique miRNA seeds, **Table S5**). The non-redundant seeds of significantly upregulated  
301 miRNAs in fed *AL-T2* animals ( $N = 6$ ; ssc-miR-148a-3p, ssc-miR-7-5p, ssc-miR-30-3p,  
302 ssc-miR-151-3p, ssc-miR-374a-3p and ssc-miR-421-5p, **Table S5**) were selected as  
303 potential post-transcriptional regulators of GM muscle mRNA expression in response to  
304 nutrient supply. EISA results made possible to detect 133 genes with significant effects  
305 ( $|FC| > 2$ ;  $q$ -value  $< 0.05$ , **Table S6**), of which three had  $> 2$ -folds reduced  $\Delta Ex$   
306 fractions and two of them had significantly negative PTc scores ( $q$ -value  $< 0.05$ , **Table**  
307 **1**).

308 To detect mRNA genes putatively downregulated by miRNAs at the post-transcriptional  
309 level, mRNA genes displaying the top 5% negative PTc scores with at least 2-folds  $\Delta Ex$   
310 reduction were selected as putative miRNA-targets (**Fig. S2B**). With this approach, 26  
311 mRNA genes were selected (**Table 1**). One of them (ENSSSCG00000049158) did not  
312 have a properly annotated 3'-UTR so it was excluded from further analyses. Among this  
313 set of 26 genes with high post-transcriptional signals, 18 appeared as significantly  
314 downregulated in the differential expression analysis considering their exonic fractions  
315 ( $FC < -2$ ;  $q$ -value  $< 0.05$ , **Table 1** and **Table S4**).

316

317 *Context-based pruning of predicted miRNA-mRNA interactions removes spurious*  
318 *unreliable target events*

319 As a first step to determine if genes with highly negative PTc scores and showing a  
320 marked reduction in exonic fractions were repressed by upregulated DE miRNAs  
321 (**Table S5**), we aimed to investigate the accuracy and reliability of *in silico* predictions  
322 regarding miRNA binding sites in their 3'-UTRs (**Table S7**).

323 We evaluated the presence of enriched binding sites over a random background of  
324 expressed genes with no context-based removal of predicted binding sites, applying  
325 each one of the three selection criteria reported in Methods independently, as well as by  
326 combining them pairwise or altogether. As depicted in **Fig. S3A** and **S3B**, introducing  
327 additional context-based filtering criteria for removing spurious unreliable binding site  
328 predictions resulted in an overall increased enrichment of miRNA targeted genes within  
329 the top 1% (**Fig. S3A**) and 5% (**Fig. S3B**) negative P<sub>Tc</sub> scores and displaying > 2-folds  
330 ΔEx reduction. This significantly increased enrichment was more evident when using  
331 the AU-rich-based criterion (AU), as shown in **Fig. S3A**). However, we also detected a  
332 slight increment when adding the other two context-based removal criteria, i.e., miRNA  
333 binding sites located in the middle of the 3'-UTR sequence (M) or located too close (<  
334 15 nts) to the beginning or the end of the 3'-UTR sequences (E). These findings were  
335 less evident when taking into consideration the list of the top 5% genes (**Fig. S3B**),  
336 probably due to the reduced stringency of gene prioritization and the inclusion of  
337 putative false positive candidate genes that are not targeted by the non-redundant seeds  
338 of upregulated miRNAs (N = 6, **Table S5**). Nevertheless, an increased enrichment for  
339 targeted mRNAs by DE upregulated miRNAs was detectable for all combined filtering  
340 criteria, especially for 7mer-A1 binding sites, and probably at the expense of the scarcer  
341 and more efficient 8mer binding sites. Based on these results, we decided to apply the  
342 three joint criteria (AU, M and E) for enrichment analyses between the set of mRNA  
343 genes with high post-transcriptional signals and putatively targeted by miRNAs.

344

345 *Genes with relevant post-transcriptional signals are enriched for putative miRNA*  
346 *binding sites in their 3'-UTRs*

347 Target prediction and context-based pruning of miRNA-mRNA interactions for mRNA  
348 genes displaying the top 5% negative P<sub>Tc</sub> scores and at least 2-folds reductions in the  
349 ΔEx exonic fraction (N = 25 after excluding ENSSSCG00000049158) made possible to  
350 detect 11 8mer, 21 7mer-m8 and 22 7mer-A1 miRNA binding sites (**Table S7**)  
351 corresponding to the non-redundant seeds of DE upregulated miRNAs (N = 6) in *AL-T2*  
352 gilts (**Table S5**).

353 Furthermore, we aimed to determine if mRNA genes showing putative post-  
354 transcriptional repression by miRNAs were enriched to be targeted by miRNAs (i.e.,  
355 assessing whether the number of these genes being putative targets of upregulated  
356 miRNAs were significantly higher compared with the whole set of expressed mRNAs).  
357 The set of mRNA genes displaying the top 5% (N = 25, **Fig. 1A**) P<sub>Tc</sub> scores and at least  
358 2-folds ΔEx reduction showed a significant (*P*-value < 0.05) enrichment in 8mer, 7mer-  
359 m8 and 7mer-A1 sites (**Fig. 1B**), and this was especially relevant when combining these  
360 three types of binding sites. More importantly, 21 out of 25 genes displaying the top 5%  
361 P<sub>Tc</sub> scores (**Table S7**) were predicted as putative targets of miRNAs upregulated in the  
362 GM muscle samples from *AL-T2* fed gilts (**Table 1** and **Table S5**).

363 We also evaluated the enrichment of the mRNA genes with the top 5% negative P<sub>Tc</sub>  
364 scores and at least 2-folds ΔEx reduction (N = 25, **Table 1**) to be targeted by the  
365 following sets of miRNAs: (i) Non-redundant downregulated miRNAs in *AL-T2* fed  
366 gilts (ssc-miR-1285, ssc-miR-758, ssc-miR-339, sc-miR-22-3p, ssc-miR-296-5p, ssc-  
367 miR-129a-3p, ssc-miR-181c and ssc-miR-19b, **Table S5**), (ii) the top 5% most  
368 expressed miRNAs, excluding those being upregulated (ssc-miR-1, ssc-miR-133a-3p,  
369 ssc-miR-26a, ssc-miR-10b, ssc-miR-378, ssc-miR-99a-5p, ssc-miR-27b-3p, ssc-miR-  
370 30d, ssc-miR-486 and ssc-let-7f-5p) and (iii) for an iteration (N = 100) of random sets  
371 of 10 expressed miRNAs, irrespective of their DE and abundance status, as a control

372 test. None of these additional analyses recovered a significant enrichment for any type  
373 of the three considered miRNA target subtypes (**Fig. 1B**).

374 The gene with the highest and significant PTc score was the Dickkopf WNT Signaling  
375 Pathway Inhibitor 2 (*DKK2*) locus (**Table 1**), meaning that this gene was the most one  
376 with the highest putative miRNA-driven downregulation and no additional  
377 transcriptional influence. Moreover, the *DKK2* locus was the only gene harboring two  
378 miRNA 8mer binding sites (**Table S7**), although it was not among the most highly DE  
379 mRNA genes according to differential expression analyses (**Table S4**). As depicted in  
380 **Table 1**, only suggestive significant differences in mean expression were found for  
381 *DKK2* transcripts. Besides, among the set of mRNA genes displaying the top 5% PTc  
382 scores and at least 2-folds  $\Delta$ Ex reduction (**Table 1**), 5 were not DE, and 3 of them only  
383 showed suggestive DE, while the rest of DE mRNAs displayed a wide range of  
384 significance (**Table S4**). The divergence between EISA and differential expression  
385 results is also shown in **Fig. 1C**, where not all the mRNA genes highlighted by EISA  
386 (**Fig. 1A**) were DE downregulated loci.

387 The miRNAs with the highest number of significant miRNA-mRNA interactions (in  
388 terms of correlations between their expression levels) were ssc-miR-30a-3p and ssc-  
389 miR-421-5p, which showed 9 and 8 significant miRNA-mRNA interactions, followed  
390 by ssc-miR-148-3p with 4 significant interactions with mRNA genes showing  
391 significant post-transcriptional signals (**Table S7**).

392

393 *Genes showing post-transcriptional regulatory signals predominantly covary at the*  
394 *exonic level*

395 To further elucidate whether genes displaying the top 5% PTc scores are strong  
396 candidates to be regulated by miRNAs according to in silico predictions (N = 21), we



397 evaluated the covariation patterns among them and with the whole set of DE mRNA  
398 genes ( $q$ -value  $< 0.05$ ,  $N = 454$ ) by using RNA-seq data from *AL-T0* and *AL-T2* gilts. If  
399 multiple genes are downregulated by any upregulated miRNAs in a coordinated  
400 manner, we would expect to observe a reduced abundance in their mature spliced  
401 mRNA forms but not in the corresponding primary transcripts, i.e., we would detect a  
402 covariation only for the exonic fractions (but not for the intronic ones). In other words,  
403 the intronic fraction, eventually spliced and degraded in the nucleus, should not reflect  
404 any posterior post-transcriptional regulatory effects in the cytoplasm, so little or null  
405 covariation might be expected.

406 By calculating CES values (see Methods) for genes with the top 5% negative PTc  
407 scores and 2-folds  $\Delta$ Ex reduction that are putatively targeted by DE upregulated  
408 miRNAs ( $N = 21$ ), we obtained an estimation of the fold change in their observed  
409 covariation with respect to other DE mRNAs ( $N = 435$ ). CES values were measured for  
410 both their exonic and intronic fractions. Our analyses revealed that these genes showed  
411 a significantly increased covariation of approximately 2-folds in their exonic fractions  
412 when compared to intronic fractions (**Fig. 1D**). When we iteratively analyzed the  
413 observed fold change in covariation for random sets of genes ( $N = 1,000$ ), they  
414 displayed  $CES \approx 1$ , indicative of no covariation (**Fig. 1D**). The observed CES  
415 distributions of exonic, intronic and control sets were significantly different ( $P$ -value =  
416  $3.663E-06$ ) after running non-parametric tests (**Fig. 1D**), thus supporting that the genes  
417 displaying the top 5% PTc scores are probably repressed by DE upregulated by  
418 miRNAs.

419 From the set of 21 mRNA genes with the top 5% negative PTc scores and at least 2-  
420 folds  $\Delta$ Ex reduction that are putatively targeted by DE upregulated miRNAs, 19 showed

421 an overall increased covariation in their exonic fractions compared with their intronic  
422 fractions (**Table S8**).

423

### 424 **3.2. Studying post-transcriptional signals in adipocytes metabolism using an** 425 **independent Duroc-Göttingen minipig population**

426 In this section, we will summarize the main findings obtained in the experimental  
427 system represented by adipose tissue samples from Duroc-Göttingen minipigs [26,27].

428 After pre-processing and filtering of sequenced reads from fat samples obtained from 5  
429 lean and 5 obese individuals, we were able to retrieve ~98.1 and ~0.87 million mRNA

430 and small RNA reads per sample, and ~96.5% and ~73.4% of these reads mapped to  
431 annotated porcine mRNA and miRNA genes, respectively. Differential expression

432 analyses revealed a total of 299 DE mRNAs ( $q$ -value  $< 0.05$ ), of which 52 mRNAs were  
433 downregulated and 95 were upregulated ( $|FC| > 2$ ;  $q$ -value  $< 0.05$ ), respectively (**Table**

434 **S9**). Regarding miRNAs, only one gene (ssc-miR-92b-3p) was significantly upregulated  
435 in *lean* pigs ( $|FC| > 2$ ;  $q$ -value  $< 0.05$ ), while 7 additional miRNAs showed suggestive

436 differential expression ( $P$ -value  $< 0.01$ ), of which 4 were downregulated and one of  
437 them (ssc-miR-92a) shared the same seed sequence with ssc-miR-92b-3p (**Table S10**).

438 After running EISA on the mRNA expression profiles for exonic and intronic fractions,  
439 a total of 44 downregulated mRNAs in *lean* pigs displayed the top 5% PTC scores with

440 reduced  $\Delta Ex > 2$ -folds (**Table S11, Fig. 2A**). One of them (ENSSSCG00000016928)  
441 did not have a properly annotated 3'-UTR so it was excluded from further analyses. The

442 whole set of mRNA genes from EISA results is available at **Table S12**. Among this set  
443 of genes with high post-transcriptional signals, 13 appeared as significantly

444 downregulated ( $FC < -2$ ;  $q$ -value  $< 0.05$ ) and 9 had suggestive repression ( $P$ -value  $<$   
445  $0.01$ ) in the differential expression analysis considering their exonic fractions (**Table S9**

446 and **S11**). In this dataset, the sestrin 3 (*SESN3*) locus showed the second highest  
447 negative P<sub>Tc</sub> score, but was the only one among the rest of highlighted genes where a  
448 significant post-transcriptional signal was observed (**Table S11**), i.e., equivalent to the  
449 *DKK2* gene in Duroc pigs, this was the only locus showing post-transcriptional  
450 regulation with no additional co-occurring transcriptional signal. Such strong  
451 downregulation was also evidenced in differential expression analyses, where it was the  
452 most significantly DE gene (**Table S9**).

453 From these set of genes, 25 out of the 43 mRNA genes analyzed for miRNA binding  
454 sites were classified as putative targets of the set of miRNAs upregulated in *lean* pigs  
455 (*ssc-miR-92b-3p*, *ssc-miR-148a-3p*, *ssc-miR-204* and *ssc-miR-214-3p*; **Table S10**).  
456 Target prediction and context-based pruning of miRNA-mRNA interactions for mRNA  
457 genes displaying the top 5% negative P<sub>Tc</sub> scores and at least 2-folds reductions in the  
458 ΔEx exonic fraction (N = 43, after excluding ENSSSCG00000016928) made possible to  
459 detect 8 8mer, 21 7mer-m8 and 24 7mer-A1 miRNA binding sites (**Table S13**)  
460 corresponding to the non-redundant seeds of selected upregulated miRNAs (N = 4) in  
461 *lean* minipigs (**Table S10**). The *SESN3* gene showed the highest number of predicted  
462 putative miRNA target sites in its 3'-UTR (**Table S13**).

463 Enrichment analyses for the set of putative miRNA target genes with the top 5%  
464 negative P<sub>Tc</sub> scores and at least 2-folds ΔEx reduction (N = 25, **Table S11**) revealed no  
465 significant enrichment for the three types of miRNA target sites considered, although a  
466 slight increase when considering 8mer + 7mer-m8 binding sites and all three types  
467 together could be observed (**Fig. 2B**). Among this set of genes (N = 25), 7 appeared as  
468 significantly downregulated (FC < -2; *q*-value < 0.05) and 6 had suggestive repression  
469 (*P*-value < 0.01) in the differential expression analysis considering their exonic  
470 fractions (**Table S9** and **S11**, **Fig. 2C**).

471 In agreement with results obtained for the *AL-T0* vs *AL-T2* contrast, the exonic fraction  
472 of the mRNA genes putatively targeted by upregulated miRNAs in lean pigs (N = 25)  
473 showed approximately 2-folds significantly increased covariation (P-value 2.703E-02)  
474 with regard to their intronic fraction (**Fig. 2D**). Besides, 18 out of these 25 mRNA genes  
475 showed an overall increased covariation in their exonic fractions compared with their  
476 intronic fractions, expressed as the increment in their CES values ( $\Delta\text{CES} = \text{exonic CES}$   
477 – intronic CES, **Table S14**).

478 Given the abundance of adipose tissue samples, we used them to carry out qPCR  
479 analyses with the aim of validating whether several mRNAs among the top 5% negative  
480 P<sub>Tc</sub> scores and with at least 2-folds  $\Delta\text{Ex}$  reduction, as well as upregulated miRNAs  
481 display patterns of expression consistent with those obtained in RNA-seq and small  
482 RNA-seq experiments. To this end, we selected 5 mRNAs (*LEP*, *OSBPL10*, *PRSS23*,  
483 *RNF157* and *SERPINE2*) and 3 miRNAs (ssc-miR-148a-30, ssc-miR-214-3p and ssc-  
484 miR-92b-3p) for qPCR expression profiling. All the analyzed mRNA genes showed a  
485 reduced expression in *lean* pigs compared with their *obese* counterparts (**Fig. 2E**) and  
486 the *LEP* gene was the most significantly downregulated gene ( $\log_2\text{FC} = -1.953$ ; P-value  
487 = 1.120E-03), This result was in agreement with the strong downregulation observed in  
488 differential expression analyses based on RNA-Seq data ( $\log_2\text{FC} = -1.957$ ; q-value =  
489 3.443E-03, **Table S9**). With regard to miRNAs, the opposite pattern of expression was  
490 observed, with all the three profiled miRNA genes being upregulated in *lean* pigs.  
491 Moreover, as reported in **Table S10**, the ssc-miR-92b-3p gene was the miRNA with the  
492 most significant upregulation as evidenced in qPCR analyses (P-value = 3.57E-02, **Fig.**  
493 **2F**).

494

495

## 496 **4. Discussion**

497 The use of EISA for post-transcriptional signals prioritization combined with target  
498 prediction of upregulated miRNAs, as well as enrichment analyses on the set of selected  
499 targeted genes and their coordinated covariation reinforced the usefulness of this  
500 approach to infer functional miRNA-mRNA interactions.

501 We have observed that the majority of mRNA genes with highly negative PTc scores,  
502 i.e., predominantly downregulated at their exonic fractions, also had a coordinated  
503 downregulatory effect in their intronic fractions, taken as a proxy of transcriptional  
504 repression. This was evidenced by the overall low significance of post-transcriptional  
505 signals within the mRNA genes with the top 5% negative PTc scores and reduced  $\Delta Ex$   
506 in both analyzed experimental conditions (**Tables 1** and **S11**). Only two genes (*DKK2*  
507 and *NAV2*) in *AL-T0* vs *AL-T2* and one gene (*SESN3*) in the *lean* vs *obese* contrasts  
508 showed significant PTc scores ( $q$ -value < 0.05, **Table 1** and **S11**), revealing that, overall,  
509 a coordinated downregulatory effect at transcriptional and post-transcriptional level was  
510 present, which is in agreement with previous reports using EISA [14,15]. However, it is  
511 worth noting that we did not consider the significance of PTc scores as a relevant  
512 criterion for prioritizing putative post-transcriptionally downregulated genes, as these  
513 will appear as significant when the post-transcriptional activity is the only mechanism  
514 modulating the target gene expression profile. Only co-occurring yet opposite  
515 transcriptional and post-transcriptional events or single post-transcriptional signals  
516 would arise as significant, excluding those genes with both coordinated downregulation  
517 at the post-transcriptional level.

518 We decided to use the intronic fraction of expressed mRNAs as a proxy of their  
519 transcriptional activity. In this way, the intronic fraction might reflect an approximation  
520 to the transcriptional activity of yet unspliced mRNA transcripts leading to the

521 accumulation of intronic sequences prior to their debranching and degradation by  
522 exonucleases. The use of intronic fractions as a proxy of transcription allows the use of  
523 RNA-seq datasets to apply EISA without the need of further experimental procedures  
524 and it can also be applied to investigate transcriptional regulatory signals [15]. Previous  
525 reports have also explored the use of specific techniques to capture nascent mRNA  
526 transcripts before they are spliced [50–52], and these have been used to account for the  
527 transcriptional activity in a similar approach to EISA [53]. Although more advanced  
528 methodologies able to measure transient transcription of mRNAs might provide a better  
529 resolution for future experimental designs [53], EISA would be still useful to explore  
530 already available RNA-seq data where additional experiments are no longer possible.

531 Since the efficacy of miRNA targeting depends on the context of the target site within  
532 the 3'-UTR [43], we have described the usefulness of introducing context-based  
533 filtering criteria for removing spurious *in silico*-predicted target sites for miRNAs. By  
534 using enrichment analyses, we were able to link the downregulated mRNAs at their  
535 exonic fractions to upregulated miRNAs that were putatively targeting them and  
536 triggering their observed decay in differential expression analyses. The influence of  
537 other non-DE highly expressed miRNAs or downregulated miRNAs was discarded by  
538 the lack of predicted targeted mRNA genes with high post-transcriptional  
539 downregulatory signals for such miRNAs. Overall, the increase in enrichment  
540 significance shown for targeted mRNAs with post-transcriptional signals and  
541 upregulated miRNAs, as opposed to other highly expressed and/or downregulated  
542 miRNAs, revealed the ability of context-based filtering criteria to discriminate and  
543 remove weak or false positive target sites located within unfavored regions of the 3'-  
544 UTR. However, highly efficient target sites such as those of type 8mer, although scarcer  
545 than 7mer-m8 sites, might still be functional even at unfavored positions [43,54,55].

546 This may partially explain the relative lack of 8mer sites found in the top post-  
547 transcriptionally regulated mRNA genes in both experimental setups.

548 We further hypothesized that genes showing relevant post-transcriptional  
549 downregulatory effects might be regulated by the same set of significantly upregulated  
550 miRNAs, which could induce shared covariation in their expression profiles at the  
551 exonic level. On the contrary, their intronic fractions would be mainly unaffected, as  
552 introns would have been excised prior to any given miRNA-driven downregulation, if  
553 occurring. In this way, an increased gene covariation might be detectable within the sets  
554 of commonly targeted mRNA genes with relevant post-transcriptional signals at the  
555 exon but not at the intron level, as opposed to covariation events of these set of genes  
556 with the rest of DE genes. Our results indicated an increased degree of the observed  
557 covariation between genes with high post-transcriptional signals at their exonic  
558 fractions, highlighting a putative coordinated downregulation by the set of significantly  
559 upregulated miRNAs.

560 From the analysis of top mRNA genes showing the strongest post-transcriptional  
561 downregulatory effects in fasted (*AL-T0*) vs fed (*AL-T2*) gilts, several biological  
562 functions putatively regulated by miRNAs were revealed. The *DKK2* gene was the one  
563 showing the highest negative PTC score, and its post-transcriptional regulatory signal  
564 was also significant (**Table 1**), meaning that no additional coordinated transcriptional  
565 downregulation was found for this particular gene. Moreover, this gene also showed the  
566 strongest covariation difference in its exonic fraction compared with its intronic fraction  
567 (**Table S13**). This consistent post-transcriptional regulatory effect might be explained  
568 by the presence of two miRNA target sites of type 8mer in its 3'-UTR for ssc-miR-421-  
569 5p and ssc-miR-30a-3p, two highly DE and upregulated miRNAs (**Table S5**). Besides,  
570 ssc-miR-30e-3p, a miRNA sharing its seed and regulatory effect with ssc-miR-30a-3p,

571 was also upregulated in fed (*AL-T2*) gilts, which would reinforce the repression of their  
572 targeted mRNA transcripts. The *DKK2* gene is a member of the dickkopf family that  
573 inhibits the Wnt signaling pathway through its interaction with the LDL-receptor related  
574 protein 6 (*LRP6*). Its repression has been associated with reduced blood-glucose levels  
575 and improved glucose uptake [56], as well as with improved adipogenesis [57] and  
576 inhibition of aerobic glycolysis [58]. These results would be in agreement with the  
577 increased glucose usage and triggered adipogenesis in muscle tissue after nutrient  
578 supply. Other additional relevant post-transcriptionally downregulated mRNA genes  
579 found by EISA were: (i) pyruvate dehydrogenase kinase 4 (*PDK4*), a mitochondrial  
580 enzyme that inhibits pyruvate to acetyl-CoA conversion and hinders glucose utilization  
581 promoting fatty acids oxidation in energy-deprived cells under fasting conditions  
582 [59,60], (ii) interleukin 18 (*IL18*), involved in controlling energy homeostasis in the  
583 muscle by inducing AMP-activated protein kinase (AMPK) [61], a master metabolic  
584 regulator that is suppressed upon nutrient influx in cells [62], (iii) nuclear receptor  
585 subfamily 4 group A member 3 (*NR4A3*), which activates both glycolytic and  
586 glycogenic factors [63], as well as  $\beta$ -oxidation in muscle cells [64], (iv) acetylcholine  
587 receptor subunit  $\alpha$  (*CHRNA1*) of muscle cells, that is linked to the inhibition of nicotine-  
588 dependent *STAT3* upregulation [65] that results in protection against insulin resistance  
589 in muscle [66], (v) PBX homeobox 1 (*PBX1*), a regulator of adipocyte differentiation  
590 [67], (vi) Tet methylcytosine dioxygenase 2 (*TET2*), linked to glucose-dependent  
591 AMPK phosphorylation [68] and (vii) BTB domain and CNC homolog (*BACH2*),  
592 associated with mTOR complex 2 (mTORC2) glucose-dependent activation [69,70] and  
593 the repression of forkhead box protein O1 (*FOXO1*) [71] and *PDK4* in a coordinated  
594 manner [7,72]. Overall, the highlighted downregulated genes in the muscle of fed gilts



595 after nutrient supply pointed towards a common regulatory function of miRNAs in  
596 modulating glucose uptake and energy homeostasis of the skeletal myocytes.

597 Although miRNAs were the major post-transcriptional regulators that we considered in  
598 this study, it is important to remark that other additional post-transcriptional  
599 modifications and interactions might be responsible of the observed downregulation of  
600 mRNAs [73–77]. This could explain the presence of non-miRNA targets within the top  
601 post-transcriptional signals, as well as additional regulatory mechanisms not directly  
602 involved in energy homeostasis or glucose usage among the highlighted genes. For  
603 instance, three circadian clock-related mRNA genes that showed high post-  
604 transcriptional signals were the circadian associated repressor of transcription (*CIART*),  
605 period 1 (*PER1*) and salt inducible kinase 1 (*SIK1*), yet the first two were not detected  
606 as targets of differentially expressed miRNAs, as shown in **Table 1**. As previously  
607 reported for this experimental design [22], the presence of several genes showing  
608 abundance differences might reflect a tight feedback interplay among them, where their  
609 expression and accumulation are coordinately regulated.

610 Regarding EISA results in RNA-seq profiles of adipocytes from lean and obese Duroc-  
611 Göttingen minipigs, several of the mRNA genes that showed high post-transcriptional  
612 repression were tightly involved in the regulation of lipids metabolism and energy  
613 homeostasis. The gene showing the highest post-transcriptional signal was the estrogen  
614 related receptor  $\gamma$  (*ESRRG*), which modulates oxidative metabolism and mitochondrial  
615 function in adipose tissue and that results in the downregulation of adipocyte  
616 differentiation when repressed [78]. The second locus highlighted by EISA was sestrin  
617 3 (*SESN3*), an activator of mTORC2 and PI3K/AKT signaling pathway [79] that  
618 protects against insulin resistance and promotes lipolysis when inhibited [80]. This gene  
619 showed the most significant downregulation in lean pigs (**Table S9**), and gathered

620 multiple putative binding sites for all the four upregulated miRNAs analyzed (**Table**  
621 **S10** and **S13**). The sterile  $\alpha$  motif domain containing 4A (*SAMD4A*) knockdown has  
622 been linked to the inhibition of preadipocyte differentiation and leanness phenotype  
623 [81,82]. The prostaglandin F2- receptor protein (PTGFR) overexpression has been  
624 associated with hypertension and obesity risk [83], and its repression improved insulin  
625 sensitivity and glucose homeostasis [84]. High expression of serpin E1 and E2  
626 (*SERPINE1*, *SERPINE2*) were linked to obesogenic states and diabetic symptoms [85],  
627 while their inhibition improved glucose metabolism [86]. The serine protease 23  
628 (PRSS23) regulates insulin sensitivity and cytokine expression in adipose tissue, and its  
629 downregulation confers protective effects against inflammation and reduced fasting  
630 glucose level improving insulin resistance [87]. A high expression of ring finger protein  
631 157 (*RNF157*) has been described in adipose tissue with high fatness profiles and  
632 increased autophagy [88]. Silencing of ORP10 protein, encoded by the *OSBLP10* gene,  
633 promotes low-density lipoprotein (LDL) synthesis and inhibits lipogenesis [89]. The  
634 serum levels of glycosylphosphatidylinositol phospholipase 1 (GPLD1) are regulated by  
635 insulin and glucose metabolism [90] and linked to the development of insulin resistance  
636 and metabolic syndrome [91]. Overexpression of neutrophil cytosolic 2 (*NCF2*), the  
637 gene showing the highest increase in covariation at the exonic fraction (**Table S14**), was  
638 described in obese humans [92]. The repression of RAP1 GTPase activating protein  
639 (RAP1GAP) promotes RAP1 activity, which protects against obesity and insulin and  
640 glucose resistance [93,94]. Finally, leptin production was also decreased in lean pigs  
641 (**Table S10**). This key adipokine is mainly produced in adipose tissue [95] and regulates  
642 appetite, energy expenditure and body weight [96,97].

643 In summary, similar to what we found for glucose metabolism and energy homeostasis  
644 in fasted vs fed Duroc pigs, we were also able to describe a set of post-transcriptionally

645 downregulated genes in lean minipigs tightly related to adipose tissue metabolism  
646 regulation compatible with explaining, at least partially, the differences in their fatness  
647 profile compared to their obese counterparts.

648

649

## 650 **5. Conclusions**

651 In this study we have implemented an exon/intron split analysis of RNA-seq data from  
652 skeletal muscle and adipose tissue of pigs, in order to disentangle miRNA-driven post-  
653 transcriptional signals that are not evident from the analysis of differentially expressed  
654 mRNAs. In this way, we were able to prioritize regulatory relationships between  
655 upregulated miRNAs and their putative mRNA targets. We demonstrated that  
656 incorporating context-based pruning of *in silico*-predicted miRNA targets increased the  
657 reliability of the putative miRNA-mRNA interactions. Besides, these downregulated  
658 mRNAs with relevant post-transcriptional signals were significantly enriched for being  
659 cooperatively targeted by a set of upregulated miRNAs, as opposed to other highly  
660 expressed and/or downregulated miRNAs. The majority of these genes showed an  
661 average of 2-folds increase in expression covariation in their exonic fractions compared  
662 to their intronic fractions, a result that reinforced their putative post-transcriptional  
663 downregulation by miRNA-driven transcript degradation. Our results highlighted an  
664 efficient framework to prioritize mRNA genes showing post-transcriptional signals  
665 linked to miRNA-driven downregulation using exonic and intronic fractions of  
666 commonly available RNA-seq datasets.

667

668

669 **Support**

670 The present research work was funded by grants AGL2013-48742-C2-1-R and  
671 AGL2013-48742-C2-2-R awarded by the Spanish Ministry of Economy and  
672 Competitiveness. E. Mármol-Sánchez was funded with a PhD fellowship FPU15/01733  
673 awarded by the Spanish Ministry of Education and Culture (MECD). YRC is recipient  
674 of a Ramon y Cajal fellowship (RYC2019-027244-I) from the Spanish Ministry of  
675 Science and Innovation.

676

677 **Conflict of interest**

678 The authors declare no conflict of interest.

679

680 **Acknowledgements**

681 The authors would like to thank the Department of Veterinary Animal Sciences in the  
682 Faculty of Health and Medical Sciences of the University of Copenhagen for providing  
683 sequencing data and their facilities and resources for qPCR experiments. We also  
684 acknowledge Selección Batallé S.A. for providing animal material and the support of  
685 the Spanish Ministry of Economy and Competitiveness for the Center of Excellence  
686 Severo Ochoa 2020–2023 (CEX2019-000902-S) grant awarded to the Centre for  
687 Research in Agricultural Genomics (CRAG, Bellaterra, Spain). Thanks also to the  
688 CERCA Programme of the Generalitat de Catalunya for their support.

689

690

691

692

693

694 **References**

- 695 [1] N.J. Martinez, A.J.M. Walhout, The interplay between transcription factors and  
696 microRNAs in genome-scale regulatory networks, *BioEssays*. 31 (2009) 435–  
697 445. doi:10.1002/bies.200800212.
- 698 [2] D.P. Bartel, Metazoan microRNAs, *Cell*. 173 (2018) 20–51.  
699 doi:10.1016/j.cell.2018.03.006.
- 700 [3] C.M.J. Mentzel, C. Anthon, M.J. Jacobsen, P. Karlskov-Mortensen, C.S. Bruun,  
701 C.B. Jørgensen, J. Gorodkin, S. Cirera, M. Fredholm, Gender and obesity  
702 specific microRNA expression in adipose tissue from lean and obese pigs., *PLoS*  
703 *One*. 10 (2015) e0131650. doi:10.1371/journal.pone.0131650.
- 704 [4] H. Han, S. Gu, W. Chu, W. Sun, W. Wei, X. Dang, Y. Tian, K. Liu, J. Chen,  
705 miR-17-5p regulates differential expression of *NCOA3* in pig intramuscular and  
706 subcutaneous adipose tissue, *Lipids*. 52 (2017) 939–949. doi:10.1007/s11745-  
707 017-4288-4.
- 708 [5] W. Wei, B. Li, K. Liu, A. Jiang, C. Dong, C. Jia, J. Chen, H. Liu, W. Wu,  
709 Identification of key microRNAs affecting drip loss in porcine longissimus dorsi  
710 by RNA-Seq, *Gene*. 647 (2018) 276–282. doi:10.1016/j.gene.2018.01.005.
- 711 [6] S. Xie, X. Li, L. Qian, C. Cai, G. Xiao, S. Jiang, B. Li, T. Gao, W. Cui, L.L.  
712 Guan, An integrated analysis of mRNA and miRNA in skeletal muscle from  
713 myostatin-edited Meishan pigs, *Genome*. 62 (2019) 305–315. doi:10.1139/gen-  
714 2018-0110.
- 715 [7] E. Mármol-Sánchez, Y. Ramayo-Caldas, R. Quintanilla, T.F. Cardoso, R.  
716 González-Prendes, J. Tibau, M. Amills, Co-expression network analysis predicts  
717 a key role of microRNAs in the adaptation of the porcine skeletal muscle to  
718 nutrient supply, *J. Anim. Sci. Biotechnol.* 11 (2020) 10. doi:10.1186/s40104-019-

- 719 0412-z.
- 720 [8] M.A. Iqbal, A. Ali, F. Hadlich, M. Oster, H. Reyer, N. Trakooljul, V.  
721 Sommerfeld, M. Rodehutsord, K. Wimmers, S. Ponsuksili, Dietary phosphorus  
722 and calcium in feed affects miRNA profiles and their mRNA targets in jejunum  
723 of two strains of laying hens, *Sci. Rep.* 11 (2021) 13534. doi:10.1038/S41598-  
724 021-92932-3.
- 725 [9] A. Ali, E. Murani, F. Hadlich, X. Liu, K. Wimmers, S. Ponsuksili, In utero fetal  
726 weight in pigs is regulated by microRNAs and their target genes, *Genes.* 12  
727 (2021) 1264. doi:10.3390/genes12081264.
- 728 [10] D. Gaidatzis, L. Burger, M. Florescu, M.B. Stadler, Analysis of intronic and  
729 exonic reads in RNA-seq data characterizes transcriptional and post-  
730 transcriptional regulation, *Nat. Biotechnol.* 33 (2015) 722–729.  
731 doi:10.1038/nbt.3269.
- 732 [11] A. Ameer, A. Zaghlool, J. Halvardson, A. Wetterbom, U. Gyllensten, L.  
733 Cavelier, L. Feuk, Total RNA sequencing reveals nascent transcription and  
734 widespread co-transcriptional splicing in the human brain., *Nat. Struct. Mol.*  
735 *Biol.* 18 (2011) 1435–40. doi:10.1038/nsmb.2143.
- 736 [12] J.M. Gray, D.A. Harmin, S.A. Boswell, N. Cloonan, T.E. Mullen, J.J. Ling, N.  
737 Miller, S. Kuersten, Y.-C. Ma, S.A. McCarroll, S.M. Grimmond, M. Springer,  
738 SnapShot-Seq: a method for extracting genome-wide, in vivo mRNA dynamics  
739 from a single total RNA sample., *PLoS One.* 9 (2014) e89673.  
740 doi:10.1371/journal.pone.0089673.
- 741 [13] G.-J. Hendriks, D. Gaidatzis, F. Aeschmann, H. Großhans, Extensive oscillatory  
742 gene expression during *C. elegans* larval development., *Mol. Cell.* 53 (2014)  
743 380–92. doi:10.1016/j.molcel.2013.12.013.

744

745 [14] J. Cursons, K.A. Pillman, K.G. Scheer, P.A. Gregory, M. Foroutan, S. Hediye-  
746 Zadeh, J. Toubia, E.J. Crampin, G.J. Goodall, C.P. Bracken, M.J. Davis,  
747 Combinatorial targeting by microRNAs co-ordinates post-transcriptional control  
748 of EMT, *Cell Syst.* 7 (2018) 77-91.e7. doi:10.1016/j.cels.2018.05.019.

749 [15] K.A. Pillman, K.G. Scheer, E. Hackett-Jones, K. Saunders, A.G. Bert, J. Toubia,  
750 H.J. Whitfield, S. Sapkota, L. Sourdin, H. Pham, T.D. Le, J. Cursons, M.J. Davis,  
751 P.A. Gregory, G.J. Goodall, C.P. Bracken, Extensive transcriptional responses  
752 are co-ordinated by microRNAs as revealed by Exon–Intron Split Analysis  
753 (EISA), *Nucleic Acids Res.* 47 (2019) 8606-8619. doi:10.1093/nar/gkz664.

754 [16] D. Pérez-Montarelo, A. Fernández, C. Barragán, J.L. Noguera, J.M. Folch, M.C.  
755 Rodríguez, C. Óvilo, L. Silió, A.I. Fernández, Transcriptional characterization of  
756 porcine leptin and leptin receptor genes, *PLoS One.* 8 (2013) e66398.  
757 doi:10.1371/journal.pone.0066398.

758 [17] C. Ovilo, R. Benítez, A. Fernández, Y. Núñez, M. Ayuso, A.I. Fernández, C.  
759 Rodríguez, B. Isabel, A.I. Rey, C. López-Bote, L. Silió, Longissimus dorsi  
760 transcriptome analysis of purebred and crossbred Iberian pigs differing in muscle  
761 characteristics., *BMC Genomics.* 15 (2014) 413. doi:10.1186/1471-2164-15-413.

762 [18] A. Puig-Oliveras, Y. Ramayo-Caldas, J. Corominas, J. Estellé, D. Pérez-  
763 Montarelo, N.J. Hudson, J. Casellas, J.M. Folch, M. Ballester, Differences in  
764 muscle transcriptome among pigs phenotypically extreme for fatty acid  
765 composition., *PLoS One.* 9 (2014) e99720. doi:10.1371/journal.pone.0099720.

766 [19] C.M. Pilcher, C.K. Jones, M. Schroyen, A.J. Severin, J.F. Patience, C.K. Tuggle,  
767 J.E. Koltés, Transcript profiles in longissimus dorsi muscle and subcutaneous  
768 adipose tissue: A comparison of pigs with different postweaning growth rates, *J.*

- 769 Anim. Sci. 93 (2015) 2134–2143. doi:10.2527/jas.2014-8593.
- 770 [20] M. Ayuso, A. Fernández, Y. Núñez, R. Benítez, B. Isabel, A.I. Fernández, A.I.  
771 Rey, A. González-Bulnes, J.F. Medrano, Á. Cánovas, C.J. López-Bote, C. Óvilo,  
772 Developmental stage, muscle and genetic type modify muscle transcriptome in  
773 pigs: Effects on gene expression and regulatory factors involved in growth and  
774 metabolism, PLoS One. 11 (2016) e0167858. doi:10.1371/journal.pone.0167858.
- 775 [21] T.F. Cardoso, A. Cánovas, O. Canela-Xandri, R. González-Prendes, M. Amills,  
776 R. Quintanilla, RNA-seq based detection of differentially expressed genes in the  
777 skeletal muscle of Duroc pigs with distinct lipid profiles, Sci. Rep. 7 (2017)  
778 40005. doi:10.1038/srep40005.
- 779 [22] T.F. Cardoso, R. Quintanilla, J. Tibau, M. Gil, E. Mármol-Sánchez, O. González-  
780 Rodríguez, R. González-Prendes, M. Amills, Nutrient supply affects the mRNA  
781 expression profile of the porcine skeletal muscle, BMC Genomics. 18 (2017)  
782 603. doi:10.1186/s12864-017-3986-x.
- 783 [23] J. Horodyska, K. Wimmers, H. Reyer, N. Trakooljul, A.M. Mullen, P.G. Lawlor,  
784 R.M. Hamill, RNA-seq of muscle from pigs divergent in feed efficiency and  
785 product quality identifies differences in immune response, growth, and  
786 macronutrient and connective tissue metabolism, BMC Genomics. 19 (2018)  
787 791. doi:10.1186/s12864-018-5175-y.
- 788 [24] R. Benítez, N. Trakooljul, Y. Núñez, B. Isabel, E. Murani, E. De Mercado, E.  
789 Gómez-Izquierdo, J. García-Casco, C. López-Bote, K. Wimmers, C. Óvilo,  
790 Breed, diet, and interaction effects on adipose tissue transcriptome in iberian and  
791 duroc pigs fed different energy sources, Genes. 10 (2019) 589.  
792 doi:10.3390/genes10080589.
- 793 [25] M. Ballester, M. Amills, O. González-Rodríguez, T.F. Cardoso, M. Pascual, R.



- 794 González-Prendes, N. Panella-Riera, I. Díaz, J. Tibau, R. Quintanilla, Role of  
795 AMPK signalling pathway during compensatory growth in pigs, *BMC Genomics*.  
796 19 (2018) 682. doi:10.1186/s12864-018-5071-5.
- 797 [26] L.J.A. Kogelman, H.N. Kadarmideen, T. Mark, P. Karlskov-Mortensen, C.S.  
798 Bruun, S. Cirera, M.J. Jacobsen, C.B. Jørgensen, M. Fredholm, An F2 pig  
799 resource population as a model for genetic studies of obesity and obesity-related  
800 diseases in humans: Design and genetic parameters, *Front. Genet.* 4 (2013) 29.  
801 doi:10.3389/fgene.2013.00029.
- 802 [27] S.D. Pant, P. Karlskov-Mortensen, M.J. Jacobsen, S. Cirera, L.J.A. Kogelman,  
803 C.S. Bruun, T. Mark, C.B. Jørgensen, N. Grarup, E.V.R. Appel, E.A.A.  
804 Galjatovic, T. Hansen, O. Pedersen, M. Guerin, T. Huby, P. Lesnik, T.H.E.  
805 Meuwissen, H.N. Kadarmideen, M. Fredholm, Comparative analyses of QTLs  
806 influencing obesity and metabolic phenotypes in pigs and humans, *PLoS One*. 10  
807 (2015) e0137356. doi:10.1371/journal.pone.0137356.
- 808 [28] M.J. Jacobsen, J.H. Havgaard, C. Anthon, C.M.J. Mentzel, S. Cirera, P.M.  
809 Krogh, S. Pundhir, P. Karlskov-Mortensen, C.S. Bruun, P. Lesnik, M. Guerin, J.  
810 Gorodkin, C.B. Jørgensen, M. Fredholm, R. Barrès, Epigenetic and  
811 transcriptomic characterization of pure adipocyte fractions from obese pigs  
812 identifies candidate pathways controlling metabolism, *Front. Genet.* 10 (2019)  
813 1268. doi:10.3389/fgene.2019.01268.
- 814 [29] P. Decaunes, D. Estève, A. Zakaroff-Girard, C. Sengenès, J. Galitzky, A.  
815 Bouloumié, Adipose-derived stromal cells: cytokine expression and immune cell  
816 contaminants., *Methods Mol. Biol.* 702 (2011) 151–161. doi:10.1007/978-1-  
817 61737-960-4\_12.
- 818 [30] S. Cirera, Highly efficient method for isolation of total RNA from adipose

- 819 tissue., *BMC Res. Notes.* 6 (2013) 472. doi:10.1186/1756-0500-6-472.
- 820 [31] M. Martin, Cutadapt removes adapter sequences from high-throughput  
821 sequencing reads, *EMBnet.Journal.* 17 (2011) 10. doi:10.14806/ej.17.1.200.
- 822 [32] A. Warr, N. Affara, B. Aken, H. Beiki, D.M. Bickhart, K. Billis, W. Chow, L.  
823 Eory, H.A. Finlayson, P. Flicek, C.G. Girón, D.K. Griffin, R. Hall, G. Hannum,  
824 T. Hourlier, K. Howe, D.A. Hume, O. Izuogu, K. Kim, S. Koren, H. Liu, N.  
825 Manchanda, F.J. Martin, D.J. Nonneman, R.E. O'Connor, A.M. Phillippy, G.A.  
826 Rohrer, B.D. Rosen, L.A. Rund, C.A. Sargent, L.B. Schook, S.G. Schroeder, A.S.  
827 Schwartz, B.M. Skinner, R. Talbot, E. Tseng, C.K. Tuggle, M. Watson, T.P.L.  
828 Smith, A.L. Archibald, An improved pig reference genome sequence to enable  
829 pig genetics and genomics research, *Gigascience.* 9 (2020) 1–14.  
830 doi:10.1093/gigascience/giaa051.
- 831 [33] D. Kim, B. Langmead, S.L. Salzberg, HISAT: a fast spliced aligner with low  
832 memory requirements, *Nat. Methods.* 12 (2015) 357–360.  
833 doi:10.1038/nmeth.3317.
- 834 [34] B. Langmead, C. Trapnell, M. Pop, S.L. Salzberg, Ultrafast and memory-efficient  
835 alignment of short DNA sequences to the human genome, *Genome Biol.* 10  
836 (2009) R25. doi:10.1186/gb-2009-10-3-r25.
- 837 [35] M. Lawrence, W. Huber, H. Pagès, P. Aboyoun, M. Carlson, R. Gentleman, M.T.  
838 Morgan, V.J. Carey, Software for computing and annotating genomic ranges,  
839 *PLoS Comput. Biol.* 9 (2013) e1003118. doi:10.1371/journal.pcbi.1003118.
- 840 [36] Y. Liao, G.K. Smyth, W. Shi, The R package Rsubread is easier, faster, cheaper  
841 and better for alignment and quantification of RNA sequencing reads, *Nucleic  
842 Acids Res.* 47 (2019) e47–e47. doi:10.1093/nar/gkz114.
- 843 [37] Y. Liao, G.K. Smyth, W. Shi, featureCounts: an efficient general purpose

- 844 program for assigning sequence reads to genomic features, *Bioinformatics*. 30  
845 (2014) 923–930. doi:10.1093/bioinformatics/btt656.
- 846 [38] M.D. Robinson, D.J. McCarthy, G.K. Smyth, edgeR: a Bioconductor package for  
847 differential expression analysis of digital gene expression data., *Bioinformatics*.  
848 26 (2010) 139–40. doi:10.1093/bioinformatics/btp616.
- 849 [39] M.D. Robinson, A. Oshlack, A scaling normalization method for differential  
850 expression analysis of RNA-seq data, *Genome Biol.* 11 (2010) R25.  
851 doi:10.1186/gb-2010-11-3-r25.
- 852 [40] Y. Benjamini, Y. Hochberg, Controlling the false discovery rate: a practical and  
853 powerful approach to multiple testing, *J. R. Stat. Soc. Ser. B.* 57 (1995) 289–300.  
854 doi:10.2307/2346101.
- 855 [41] A. Kozomara, M. Birgaoanu, S. Griffiths-Jones, MiRBase: From microRNA  
856 sequences to function, *Nucleic Acids Res.* 47 (2019) D155–D162.  
857 doi:10.1093/nar/gky1141.
- 858 [42] A. Marco, SeedVicious: Analysis of microRNA target and near-target sites, *PLoS*  
859 *One.* 13 (2018) e0195532. doi:10.1371/journal.pone.0195532.
- 860 [43] A. Grimson, K.K.H. Farh, W.K. Johnston, P. Garrett-Engele, L.P. Lim, D.P.  
861 Bartel, MicroRNA targeting specificity in mammals: determinants beyond seed  
862 pairing, *Mol. Cell.* 27 (2007) 91–105. doi:10.1016/j.molcel.2007.06.017.
- 863 [44] R.C. Friedman, K.K.H. Farh, C.B. Burge, D.P. Bartel, Most mammalian mRNAs  
864 are conserved targets of microRNAs, *Genome Res.* 19 (2009) 92–105.  
865 doi:10.1101/gr.082701.108.
- 866 [45] A. Reverter, E.K.F. Chan, Combining partial correlation and an information  
867 theory approach to the reversed engineering of gene co-expression networks,  
868 *Bioinformatics*. 24 (2008) 2491–2497. doi:10.1093/bioinformatics/btn482.

- 869 [46] N.S. Watson-Haigh, H.N. Kadarmideen, A. Reverter, PCIT: an R package for  
870 weighted gene co-expression networks based on partial correlation and  
871 information theory approaches, *Bioinformatics*. 26 (2010) 411–413.  
872 doi:10.1093/bioinformatics/btp674.
- 873 [47] M. Tarbier, S.D. Mackowiak, J. Frade, S. Catuara-Solarz, I. Biryukova, E. Gelali,  
874 D.B. Menéndez, L. Zapata, S. Ossowski, M. Bienko, C.J. Gallant, M.R.  
875 Friedländer, Nuclear gene proximity and protein interactions shape transcript  
876 covariations in mammalian single cells, *Nat. Commun.* 11 (2020) 5445.  
877 doi:10.1038/s41467-020-19011-5.
- 878 [48] H.B. Mann, D.R. Whitney, On a test of whether one of two random variables is  
879 stochastically larger than the other, *Ann. Math. Stat.* 18 (1947) 50–60.  
880 doi:10.1214/aoms/1177730491.
- 881 [49] A.B. Nygard, C.B. Jørgensen, S. Cirera, M. Fredholm, Selection of reference  
882 genes for gene expression studies in pig tissues using SYBR green qPCR, *BMC*  
883 *Mol. Biol.* 8 (2007) 67. doi:10.1186/1471-2199-8-67.
- 884 [50] L.J. Core, J.J. Waterfall, J.T. Lis, Nascent RNA sequencing reveals widespread  
885 pausing and divergent initiation at human promoters, *Science*. 322 (2008) 1845–  
886 1848. doi:10.1126/science.1162228.
- 887 [51] D.B. Mahat, H. Kwak, G.T. Booth, I.H. Jonkers, C.G. Danko, R.K. Patel, C.T.  
888 Waters, K. Munson, L.J. Core, J.T. Lis, Base-pair resolution genome-wide  
889 mapping of active RNA polymerases using precision nuclear run-on (PRO-seq),  
890 *Nat. Protoc.* 11 (2016) 1455. doi:10.1038/nprot.2016.086.
- 891 [52] A. Blumberg, Y. Zhao, Y.-F. Huang, N. Dukler, E.J. Rice, A.G. Chivu, K.  
892 Krumholz, C.G. Danko, A. Siepel, Characterizing RNA stability genome-wide  
893 through combined analysis of PRO-seq and RNA-seq data, *BMC Biol.* 19 (2021)

- 894 30. doi:10.1186/s12915-021-00949-x.
- 895 [53] R.K. Patel, J.D. West, Y. Jiang, E.A. Fogarty, A. Grimson, Robust partitioning of  
896 microRNA targets from downstream regulatory changes, *Nucleic Acids Res.* 48  
897 (2020) 9724–9746. doi:10.1093/nar/gkaa687.
- 898 [54] R. Denzler, S.E. McGeary, A.C. Title, V. Agarwal, D.P. Bartel, M. Stoffel,  
899 Impact of microRNA levels, target-site complementarity, and cooperativity on  
900 competing endogenous RNA-regulated gene expression, *Mol. Cell.* 64 (2016)  
901 565-579. doi:10.1016/j.molcel.2016.09.027.
- 902 [55] S.E. McGeary, K.S. Lin, C.Y. Shi, T.M. Pham, N. Bisaria, G.M. Kelley, D.P.  
903 Bartel, The biochemical basis of microRNA targeting efficacy, *Science.* 366  
904 (2019) eaav1741. doi:10.1126/science.aav1741.
- 905 [56] X. Li, J. Shan, W. Chang, I. Kim, J. Bao, H.-J. Lee, X. Zhang, V.T. Samuel, G.I.  
906 Shulman, D. Liu, J.J. Zheng, D. Wu, Chemical and genetic evidence for the  
907 involvement of Wnt antagonist Dickkopf2 in regulation of glucose metabolism,  
908 *Proc. Natl. Acad. Sci.* 109 (2012) 11402–11407. doi:10.1073/pnas.1205015109.
- 909 [57] J. Yang, B. yin Shi, Dickkopf (Dkk)-2 is a beige fat-enriched adipokine to  
910 regulate adipogenesis, *Biochem. Biophys. Res. Commun.* 548 (2021) 211–216.  
911 doi:10.1016/j.bbrc.2021.02.068.
- 912 [58] F. Deng, R. Zhou, C. Lin, S. Yang, H. Wang, W. Li, K. Zheng, W. Lin, X. Li, X.  
913 Yao, M. Pan, L. Zhao, Tumor-secreted dickkopf2 accelerates aerobic glycolysis  
914 and promotes angiogenesis in colorectal cancer, *Theranostics.* 9 (2019) 1001-  
915 1014. doi:10.7150/thno.30056.
- 916 [59] J.Y. Jeong, N.H. Jeoung, K.-G. Park, I.-K. Lee, Transcriptional regulation of  
917 pyruvate dehydrogenase kinase, *Diabetes Metab. J.* 36 (2012) 328–35.  
918 doi:10.4093/dmj.2012.36.5.328.

- 919 [60] S. Zhang, M.W. Hulver, R.P. McMillan, M.A. Cline, E.R. Gilbert, The pivotal  
920 role of pyruvate dehydrogenase kinases in metabolic flexibility, *Nutr. Metab.* 11  
921 (2014) 10. doi:10.1186/1743-7075-11-10.
- 922 [61] B. Lindegaard, V.B. Mathews, C. Brandt, P. Hojman, T.L. Allen, E. Estevez,  
923 M.J. Watt, C.R. Bruce, O.H. Mortensen, S. Syberg, C. Rudnika, J. Abildgaard, H.  
924 Pilegaard, J. Hidalgo, S. Ditlevsen, T.J. Alsted, A.N. Madsen, B.K. Pedersen,  
925 M.A. Febbraio, Interleukin-18 activates skeletal muscle AMPK and reduces  
926 weight gain and insulin resistance in mice, *Diabetes.* 62 (2013) 3064–3074.  
927 doi:10.2337/DB12-1095.
- 928 [62] P. Jiang, L. Ren, L. Zhi, Z. Yu, F. Lv, F. Xu, W. Peng, X. Bai, K. Cheng, L,  
929 Quang, X. Zhang, X. Wang, Y. Zhang, D. Yang, X. Hu, R.P. Xiao, Negative  
930 regulation of AMPK signaling by high glucose via E3 ubiquitin ligase MG53,  
931 *Mol. Cell.* 81 (2021) 629-637.e5. doi:10.1016/j.molcel.2020.12.008.
- 932 [63] C. Zhang, B. Zhang, X. Zhang, G. Sun, X. Sun, Targeting orphan nuclear  
933 receptors NR4As for energy homeostasis and diabetes, *Front. Pharmacol.* 11  
934 (2020) 587457. doi:10.3389/fphar.2020.587457.
- 935 [64] M.A. Pearen, J.M. Goode, R.L. Fitzsimmons, N.A. Eriksson, G.P. Thomas, G.J.  
936 Cowin, S.C. Wang, Z.K. Tuong, G.E. Muscat, Transgenic muscle-specific Nor-1  
937 expression regulates multiple pathways that effect adiposity, metabolism, and  
938 endurance, *Mol. Endocrinol.* 27 (2013) 1897–1917. doi:10.1210/me.2013-1205.
- 939 [65] S. Xu, H. Ni, H. Chen, Q. Dai, The interaction between STAT3 and nAChR $\alpha$ 1  
940 interferes with nicotine-induced atherosclerosis via Akt/mTOR signaling  
941 cascade, *Aging.* 11 (2019) 8120–8138. doi:10.18632/aging.102296.
- 942 [66] L. Zhang, Z. Chen, Y. Wang, D.J. Twardy, W.E. Mitch, Stat3 activation induces  
943 insulin resistance via a muscle-specific E3 ubiquitin ligase Fbxo40, *Am. J.*

- 944           Physiol.       Endocrinol.       Metab.       318       (2020)       E625–E635.  
945           doi:10.1152/ajpendo.00480.2019.
- 946 [67] M.C. Monteiro, M. Sanyal, M.L. Cleary, C. Sengenès, A. Bouloumié, C. Dani, N.  
947       Billon, PBX1: a novel stage-specific regulator of adipocyte development, *Stem*  
948       *Cells*. 29 (2011) 1837–1848. doi:10.1002/stem.737.
- 949 [68] D. Wu, D. Hu, H. Chen, G. Shi, I.S. Fetahu, F. Wu, K. Rabidou, R. Fang, L. Tan,  
950       S. Xu, H. Liu, C. Argueta, L. Zhang, F. Mao, G. Yan, J. Chen, Z. Dong, R. Lv,  
951       Y. Xu, M. Wang, Y. Ye, S. Zhang, D. Duquette, S. Geng, C. Yin, C.G. Lian, G.F.  
952       Murphy, G.K. Adler, R. Garg, L. Lynch, P. Yang, Y. Li, F. Lan, J. Fan, Y. Shi,  
953       Y.G. Shi, Glucose-regulated phosphorylation of TET2 by AMPK reveals a  
954       pathway linking diabetes to cancer, *Nature*. 559 (2018) 637–641.  
955       doi:10.1038/s41586-018-0350-5.
- 956 [69] T. Tamahara, K. Ochiai, A. Muto, Y. Kato, N. Sax, M. Matsumoto, T. Koseki, K.  
957       Igarashi, The mTOR-Bach2 cascade controls cell cycle and class switch  
958       recombination during B cell differentiation, *Mol. Cell. Biol.* 37 (2017) e00418-  
959       17. doi:10.1128/mcb.00418-17.
- 960 [70] G. Leprivier, B. Rotblat, How does mTOR sense glucose starvation? AMPK is  
961       the usual suspect, *Cell Death Discov.* 6 (2020) 27. doi:10.1038/S41420-020-  
962       0260-9.
- 963 [71] A. Itoh-Nakadai, M. Matsumoto, H. Kato, J. Sasaki, Y. Uehara, Y. Sato, R.  
964       Ebina-Shibuya, M. Morooka, R. Funayama, K. Nakayama, K. Ochiai, A. Muto,  
965       K. Igarashi, A Bach2-Cebp gene regulatory network for the commitment of  
966       multipotent hematopoietic progenitors, *Cell Rep.* 18 (2017) 2401–2414.  
967       doi:10.1016/j.celrep.2017.02.029.
- 968 [72] K. Gopal, B. Saleme, R. Al Batran, H. Aburasayn, A. Eshreif, K.L. Ho, W.K.

- 969 Ma, M. Almutairi, F. Eaton, M. Gandhi, E.A. Park, G. Sutendra, J.R. Ussher,  
970 FoxO1 regulates myocardial glucose oxidation rates via transcriptional control of  
971 pyruvate dehydrogenase kinase 4 expression, *Am. J. Physiol. Circ. Physiol.* 313  
972 (2017) H479–H490. doi:10.1152/ajpheart.00191.2017.
- 973 [73] T. Glisovic, J.L. Bachorik, J. Yong, G. Dreyfuss, RNA-binding proteins and  
974 post-transcriptional gene regulation, *FEBS Lett.* 582 (2008) 1977–1986.  
975 doi:10.1016/j.febslet.2008.03.004.
- 976 [74] B.S. Zhao, I.A. Roundtree, C. He, Post-transcriptional gene regulation by mRNA  
977 modifications, *Nat. Rev. Mol. Cell Biol.* 18 (2017) 31.  
978 doi:10.1038/nrm.2016.132.
- 979 [75] M.W. Hentze, A. Castello, T. Schwarzl, T. Preiss, A brave new world of RNA-  
980 binding proteins, *Nat. Rev. Mol. Cell Biol.* 19 (2018) 327–341.  
981 doi:10.1038/nrm.2017.130.
- 982 [76] Q. Sun, Q. Hao, K. V. Prasanth, Nuclear long noncoding RNAs: key regulators  
983 of gene expression, *Trends Genet.* 34 (2018) 142–157.  
984 doi:10.1016/j.tig.2017.11.005.
- 985 [77] A. Velázquez-Cruz, B. Baños-Jaime, A. Díaz-Quintana, M.A.D. la Rosa, I. Díaz-  
986 Moreno, Post-translational control of RNA-binding proteins and disease-related  
987 dysregulation, *Front. Mol. Biosci.* 8 (2021) 658852.  
988 doi:10.3389/fmolb.2021.658852.
- 989 [78] M. Kubo, N. Ijichi, K. Ikeda, K. Horie-Inoue, S. Takeda, S. Inoue, Modulation of  
990 adipogenesis-related gene expression by estrogen-related receptor  $\gamma$  during  
991 adipocytic differentiation, *Biochim. Biophys. Acta - Gene Regul. Mech.* 1789  
992 (2009) 71–77. doi:10.1016/j.bbgram.2008.08.012.
- 993 [79] X. Huang, G. Liu, J. Guo, Z. Su, The PI3K/AKT pathway in obesity and type 2



- 994 diabetes, *Int. J. Biol. Sci.* 14 (2018) 1483. doi:10.7150/ijbs.27173.
- 995 [80] R. Tao, X. Xiong, S. Liangpunsakul, X.C. Dong, Sestrin 3 protein enhances  
996 hepatic insulin sensitivity by direct activation of the mTORC2-Akt signaling,  
997 *Diabetes*. 64 (2015) 1211–1223. doi:10.2337/db14-0539.
- 998 [81] Z. Chen, W. Holland, J.M. Shelton, A. Ali, X. Zhan, S. Won, W. Tomisato, C.  
999 Liu, X. Li, E.M.Y. Moresco, B. Beutler, Mutation of mouse *Samd4* causes  
1000 leanness, myopathy, uncoupled mitochondrial respiration, and dysregulated  
1001 mTORC1 signaling, *Proc. Natl. Acad. Sci.* 111 (2014) 7367–7372.  
1002 doi:10.1073/pnas.1406511111.
- 1003 [82] Y. Liu, H. Liu, Y. Li, R. Mao, H. Yang, Y. Zhang, Y. Zhang, P. Guo, D. Zhan, T.  
1004 Zhang, Circular RNA *SAMD4A* controls adipogenesis in obesity through the  
1005 miR-138-5p/EZH2 axis, *Theranostics*. 10 (2020) 4705–4719.  
1006 doi:10.7150/thno.42417.
- 1007 [83] B. Xiao, S.M. Gu, M.J. Li, J. Li, B. Tao, Y. Wang, Y. Wang, S. Zuo, Y. Shen, Y.  
1008 Yu, D. Chen, G. Chen, D. Kong, J. Tang, Q. Liu, D.R. Cheng, Y. Liu, S. Alberti,  
1009 M. Dovizio, R. Landolfi, L. Mucci, P.-Z. Miao, P. Gao, D.-L. Zhu, J. Wang, B.  
1010 Li, P. Patrignani, Y. Yu, Rare SNP rs12731181 in the miR-590-3p target site of  
1011 the Prostaglandin F<sub>2α</sub> receptor gene confers risk for essential hypertension in the  
1012 Han Chinese population, *Arterioscler. Thromb. Vasc. Biol.* 35 (2015) 1687–  
1013 1695. doi:10.1161/atvbaha.115.305445.
- 1014 [84] Y. Wang, S. Yan, B. Xiao, S. Zuo, Q. Zhang, G. Chen, Y. Yu, D. Chen, Q. Liu,  
1015 Y. Liu, Y. Shen, Y. Yu, Prostaglandin F<sub>2α</sub> facilitates hepatic glucose production  
1016 through CaMKII $\gamma$ /p38/FOXO1 signaling pathway in fasting and obesity,  
1017 *Diabetes*. 67 (2018) 1748–1760. doi:10.2337/db17-1521.
- 1018 [85] P. Kaur, M.D. Reis, G.R. Couchman, S.N. Forjuoh, J.F. Greene, Jr, A. Asea,

- 1019 SERPINE 1 links obesity and diabetes: a pilot study, *J. Proteomics Bioinform.* 3  
1020 (2010) 191. doi:10.4172/jpb.1000139.
- 1021 [86] G.M. Coudriet, J. Stoops, A.V. Orr, B. Bhushan, K. Koral, S. Lee, D.M. Previte,  
1022 H.H. Dong, G.K. Michalopoulos, W.M. Mars, J.D. Piganelli, A Noncanonical  
1023 role for plasminogen activator inhibitor type 1 in obesity-induced diabetes, *Am.*  
1024 *J. Pathol.* 189 (2019) 1413–1422. doi:10.1016/j.ajpath.2019.04.004.
- 1025 [87] C.-S. Kuo, J.-S. Chen, L.-Y. Lin, G.W. Schmid-Schönbein, S. Chien, P.-H.  
1026 Huang, J.-W. Chen, S.-J. Lin, Inhibition of serine protease activity protects  
1027 against high fat diet-induced inflammation and insulin resistance, *Sci. Reports.*  
1028 10 (2020) 1–11. doi:10.1038/s41598-020-58361-4.
- 1029 [88] J. Kosacka, M. Nowicki, S. Paeschke, P. Baum, M. Blüher, N. Klöting, Up-  
1030 regulated autophagy: as a protective factor in adipose tissue of WOKW rats with  
1031 metabolic syndrome, *Diabetol. Metab. Syndr.* 10 (2018) 13. doi:10.1186/S13098-  
1032 018-0317-6.
- 1033 [89] J. Perttilä, K. Merikanto, J. Naukkarinen, I. Surakka, N.W. Martin, K.  
1034 Tanhuanpää, V. Grimard, M.-R. Taskinen, C. Thiele, V. Salomaa, A. Jula, M.  
1035 Perola, I. Virtanen, L. Peltonen, V.M. Oikonen, OSBPL10, a novel candidate  
1036 gene for high triglyceride trait in dyslipidemic Finnish subjects, regulates cellular  
1037 lipid metabolism, *J. Mol. Med.* 2009 878. 87 (2009) 825–835.  
1038 doi:10.1007/S00109-009-0490-Z.
- 1039 [90] R.F. Bowen, N.S. Raikwar, L.K. Olson, M.A. Deeg, Glucose and insulin regulate  
1040 glycosylphosphatidylinositol-specific phospholipase D expression in islet beta  
1041 cells, *Metabolism.* 50 (2001) 1489–1492. doi:10.1053/meta.2001.28087.
- 1042 [91] S. Ussar, O. Bezy, M. Blüher, C.R. Kahn, Glypican-4 enhances insulin signaling  
1043 via interaction with the insulin receptor and serves as a novel adipokine,

- 1044           Diabetes. 61 (2012) 2289–2298. doi:10.2337/db11-1395.
- 1045   [92] J. Xu, X. Bao, Z. Peng, L. Wang, L. Du, W. Niu, Y. Sun, Comprehensive  
1046       analysis of genome-wide DNA methylation across human polycystic ovary  
1047       syndrome ovary granulosa cell, *Oncotarget*. 7 (2016) 27899.  
1048       doi:10.18632/oncotarget.8544.
- 1049   [93] F. Yeung, C.M. Ramírez, P.A. Mateos-Gomez, A. Pinzaro, G. Ceccarini, S.  
1050       Kabir, C. Fernández-Hernando, A. Sfeir, Nontelomeric role for Rap1 in  
1051       regulating metabolism and protecting against obesity, *Cell Rep*. 3 (2013) 1847–  
1052       1856. doi:10.1016/j.celrep.2013.05.032.
- 1053   [94] P. Martínez, G. Gómez-López, F. García, E. Mercken, S. Mitchell, J.M. Flores,  
1054       R. de Cabo, M.A. Blasco, RAP1 protects from obesity through its extratelomeric  
1055       role regulating gene expression, *Cell Rep*. 3 (2013) 2059–2074.  
1056       doi:10.1016/j.celrep.2013.05.030.
- 1057   [95] W. Yang, T. Kelly, J. He, Genetic epidemiology of obesity, *Epidemiol. Rev.* 29  
1058       (2007) 49–61. doi:10.1093/epirev/mxm004.
- 1059   [96] Y. Zhou, L. Rui, Leptin signaling and leptin resistance, *Front. Med.* 7 (2013)  
1060       207–222. doi:10.1007/s11684-013-0263-5.
- 1061   [97] A.G. Izquierdo, A.B. Crujeiras, F.F. Casanueva, M.C. Carreira, Leptin, obesity,  
1062       and leptin resistance: where are we 25 years later?, *Nutrients*. 11 (2019) 2704.  
1063       doi:10.3390/nu11112704.
- 1064
- 1065
- 1066
- 1067

1068 **Table 1:** mRNA genes with the top 5% post-transcriptional (PTc) scores and at least 2-  
 1069 folds exonic fraction ( $\Delta Ex$ ) reduction (equivalent to -1 in the  $\log_2$  scale) from *gluteus*  
 1070 *medius* skeletal muscle expression profiles of fasting (*AL-T0*, N = 11) and fed (*AL-T2*,  
 1071 N = 12) Duroc gilts.

| ID                  | Gene           | $\log_2 FC$ | $\Delta Ex$ | PT <sub>c</sub> | P-value   | q-value   | DE | miRNA target |
|---------------------|----------------|-------------|-------------|-----------------|-----------|-----------|----|--------------|
| ENSSSCG00000032094  | <i>DKK2</i>    | -2.010      | -1.431      | -4.738          | 1.654E-05 | 3.830E-03 | •  | x            |
| ENSSSCG00000015334  | <i>PDK4</i>    | -2.108      | -5.250      | -4.698          | 4.693E-03 | 1.330E-01 | x  | x            |
| ENSSSCG00000015037  | <i>IL18</i>    | -1.655      | -1.191      | -3.682          | 4.787E-03 | 1.340E-01 | •  | x            |
| ENSSSCG00000005385  | <i>NR4A3</i>   | -1.337      | -3.082      | -3.646          | 4.038E-02 | 4.098E-01 | x  | x            |
| ENSSSCG00000003766  | <i>DNAJB4</i>  | -1.391      | -1.008      | -3.348          | 8.358E-03 | 1.905E-01 |    | x            |
| ENSSSCG00000015969  | <i>CHRNA1</i>  | -1.561      | -1.339      | -3.341          | 2.606E-03 | 9.406E-02 | x  | x            |
| ENSSSCG00000039419  | <i>SLCO4A1</i> | -1.055      | -2.279      | -3.180          | 2.820E-02 | 3.544E-01 | x  | x            |
| ENSSSCG000000049158 |                | -1.107      | -1.096      | -3.164          | 3.182E-02 | 3.735E-01 |    | x            |
| ENSSSCG00000004347  | <i>FBXL4</i>   | -1.298      | -1.126      | -3.133          | 1.422E-03 | 6.520E-02 | x  | x            |
| ENSSSCG00000004979  | <i>MYO9A</i>   | -1.239      | -1.003      | -3.043          | 7.296E-03 | 1.731E-01 |    | x            |
| ENSSSCG00000013351  | <i>NAV2</i>    | -1.163      | -1.196      | -2.863          | 2.605E-04 | 2.301E-02 | x  | x            |
| ENSSSCG00000032741  | <i>TBC1D9</i>  | -0.913      | -1.061      | -2.736          | 1.534E-02 | 2.583E-01 | •  | x            |
| ENSSSCG00000031728  | <i>ABRA</i>    | -1.238      | -1.393      | -2.704          | 1.295E-03 | 6.116E-02 | x  | x            |
| ENSSSCG00000006331  | <i>PBX1</i>    | -0.891      | -1.039      | -2.480          | 1.135E-02 | 2.177E-01 | x  | x            |
| ENSSSCG00000035037  | <i>SIK1</i>    | -1.357      | -1.289      | -2.475          | 3.999E-03 | 1.212E-01 | x  | x            |
| ENSSSCG00000038374  | <i>CIART</i>   | -1.027      | -1.321      | -2.052          | 1.543E-02 | 2.587E-01 | x  |              |
| ENSSSCG00000023806  | <i>LRRN1</i>   | -0.776      | -1.013      | -1.983          | 1.580E-01 | 7.074E-01 |    | x            |
| ENSSSCG00000009157  | <i>TET2</i>    | -0.381      | -1.123      | -1.792          | 4.880E-01 | 9.582E-01 |    | x            |
| ENSSSCG00000011133  | <i>PFKFB3</i>  | -0.022      | -2.256      | -1.785          | 9.712E-01 | 9.987E-01 | x  | x            |
| ENSSSCG00000002283  | <i>FUT8</i>    | -0.578      | -1.286      | -1.784          | 9.887E-02 | 6.059E-01 | x  | x            |
| ENSSSCG00000023133  | <i>OSBPL6</i>  | -0.432      | -1.088      | -1.772          | 3.835E-01 | 9.108E-01 | x  |              |
| ENSSSCG00000017986  | <i>NDELI</i>   | -0.767      | -1.644      | -1.759          | 1.006E-02 | 2.081E-01 | x  | x            |
| ENSSSCG00000031321  | <i>NR4A1</i>   | -0.630      | -1.328      | -1.720          | 6.298E-02 | 5.006E-01 | x  |              |
| ENSSSCG00000035101  | <i>KLF5</i>    | -0.519      | -1.487      | -1.708          | 2.942E-01 | 8.488E-01 | x  | x            |
| ENSSSCG00000004332  | <i>BACH2</i>   | -0.714      | -2.105      | -1.705          | 9.089E-02 | 5.861E-01 | x  | x            |
| ENSSSCG00000017983  | <i>PER1</i>    | -0.773      | -1.073      | -1.627          | 3.000E-02 | 3.662E-01 | x  |              |

1072

1073 <sup>a</sup>Log<sub>2</sub>FC: estimated log<sub>2</sub> fold change for mean exonic fractions from *gluteus medius* expression profiles of fasted *AL-*  
 1074 *T0* and fed *AL-T2* Duroc gilts; <sup>b</sup> $\Delta Ex$ : exonic fraction increment ( $Ex_2 - Ex_1$ ) when comparing exon abundances in *AL-*  
 1075 *T0* ( $Ex_1$ ) vs *AL-T2* ( $Ex_2$ ) Duroc gilts; <sup>c</sup>PTc: post-transcriptional signal ( $\Delta Ex - \Delta Int$ ) in z-score scale; <sup>d</sup>q-value: q-value  
 1076 calculated with the false discovery rate (FDR) approach [40]. The “x” symbols represent differentially expressed  
 1077 (DE) genes ( $FC < -2$ ;  $q\text{-value} < 0.05$ ) according to their exonic fractions, as well as those targeted by at least one of  
 1078 the upregulated miRNAs excluding redundant seeds (N = 6, **Table S5**). The “•” symbol represents suggestive  
 1079 canonical differential expression ( $P\text{-value} < 0.01$ , **Table S4**).

1080

## 1081 **Figure legends**

1082 **Figure 1:** (A) Scatterplot depicting mRNA genes with the top 5% negative PTc scores  
1083 and at least 2-folds  $\Delta\text{Ex}$  reduction according to exonic ( $\Delta\text{Ex}$ ) and PTc ( $\Delta\text{Ex} - \Delta\text{Int}$ )  
1084 values (in purple) and putatively targeted by DE upregulated miRNAs ( $\text{FC} > 1.5$ ;  $q$ -  
1085 value  $< 0.05$ ) from *gluteus medius* skeletal muscle expression profiles of fasted (*AL-T0*,  
1086  $N = 11$ ) and fed (*AL-T2*,  $N = 12$ ) Duroc gilts. (B) Enrichment analyses of the number of  
1087 mRNA genes with the top 5% negative PTc scores and at least 2-folds  $\Delta\text{Ex}$  reduction  
1088 putatively targeted by DE upregulated miRNAs ( $\text{FC} > 1.5$ ;  $q$ -value  $< 0.05$ ), DE  
1089 downregulated miRNAs ( $\text{FC} < -1.5$ ;  $q$ -value  $< 0.05$ ) and the top 5% most highly  
1090 expressed miRNAs, excluding DE upregulated miRNAs. (C) Scatterplot depicting DE  
1091 upregulated (in green) and downregulated (in red) mRNA genes ( $|\text{FC}| > 2$ ;  $q$ -value  $<$   
1092  $0.05$ ) according to exonic ( $\Delta\text{Ex}$ ) and PTc ( $\Delta\text{Ex} - \Delta\text{Int}$ ) values. (D) Covariation  
1093 enrichment scores (CES) for the exonic and intronic fractions of mRNA genes with the  
1094 top 5% negative PTc scores and at least 2-folds  $\Delta\text{Ex}$  reduction, putatively targeted by  
1095 upregulated miRNAs from *gluteus medius* skeletal muscle expression profiles of fasted  
1096 (*AL-T0*,  $N = 11$ ) and fed (*AL-T2*,  $N = 12$ ) Duroc gilts. The control set of CES values  
1097 were generated by permuted ( $N = 1,000$ ) random sets of exonic and intronic profiles of  
1098 genes with same size as those used before ( $N = 21$ ). Significant differences were  
1099 assessed using a Mann-Whitney U non-parametric test [48].

1100

1101 **Figure 2:** (A) Scatterplot depicting mRNA genes with the top 5% negative PTc scores  
1102 and at least 2-folds  $\Delta\text{Ex}$  reduction according to exonic ( $\Delta\text{Ex}$ ) and PTc ( $\Delta\text{Ex} - \Delta\text{Int}$ )  
1103 values (in purple) and putatively targeted by upregulated miRNAs ( $\text{FC} > 1.5$ ;  $P$ -value  $<$   
1104  $0.01$ ) from adipocyte expression profiles of *lean* ( $N = 5$ ) and *obese* ( $N = 5$ ) Duroc-  
1105 Göttingen minipigs according to their body mass index (BMI). (B) Enrichment analyses

1106 of the number of mRNA genes with the top 5% negative PTc scores and at least 2-folds  
1107  $\Delta\text{Ex}$  reduction putatively targeted by DE upregulated miRNAs ( $\text{FC} > 1.5$ ;  $q\text{-value} <$   
1108  $0.05$ ), DE downregulated miRNAs ( $\text{FC} < -1.5$ ;  $q\text{-value} < 0.05$ ) and the top 5% most  
1109 highly expressed miRNAs, excluding DE upregulated miRNAs. (C) Scatterplot  
1110 depicting DE upregulated (in green) and downregulated (in red) mRNA genes ( $|\text{FC}| > 2$ ;  
1111  $q\text{-value} < 0.05$ ) according to exonic ( $\Delta\text{Ex}$ ) and PTc ( $\Delta\text{Ex} - \Delta\text{Int}$ ) values. (D)  
1112 Covariation enrichment scores (CES) for the exonic and intronic fractions of mRNA  
1113 genes with the top 5% negative PTc scores and at least 2-folds  $\Delta\text{Ex}$  reduction,  
1114 putatively targeted by upregulated miRNAs from adipocyte expression profiles of *lean*  
1115 ( $N = 5$ ) and *obese* ( $N = 5$ ) Duroc-Göttingen minipigs. The control set of CES values  
1116 were generated by permuted ( $N = 1,000$ ) random sets of exonic and intronic profiles of  
1117 genes with same size as those used before ( $N = 25$ ). Significant differences were  
1118 assessed using a Mann-Whitney U non-parametric test [48]. (E) Barplots depicting  
1119 qPCR  $\log_2$  transformed relative quantities (Rq) for *LEP*, *OSBPL10*, *PRSS23*, *RNF157*  
1120 and *SERPINE2* mRNA transcripts measured in adipocytes from the retroperitoneal fat  
1121 of *lean* ( $N = 5$ ) and *obese* ( $N = 5$ ) Duroc-Göttingen minipigs. (F) Barplots depicting  
1122 qPCR  $\log_2$  transformed relative quantities (Rq) for ssc-miR-148a-3p, ssc-miR-214-3p  
1123 and ssc-miR-92b-3p miRNA transcripts measured in the isolated adipocytes from the  
1124 retroperitoneal fat of *lean* ( $N = 5$ ) and *obese* ( $N = 5$ ) Duroc-Göttingen minipigs.

1125

1126

## 1127 **Supplementary Tables**

1128 **Table S1:** Phenotype values for selected Duroc-Göttingen minipigs from the F2-UNIK  
1129 resource population according to their body mass indexes (BMI).

1130

1131 **Table S2:** Primers for qPCR validation of selected mRNA and miRNA genes according  
1132 to EISA results in the F2-UNIK Duroc-Göttingen minipig population comparing *lean*  
1133 (N = 5) and *obese* (N = 5) individuals.

1134

1135 **Table S3:** Raw Cq values from qPCR analyses after efficiency correction measuring  
1136 adipocyte expression profiles of selected mRNAs and miRNAs from *lean* (N = 5) and  
1137 *obese* (N = 5) Duroc-Göttingen minipigs.

1138

1139 **Table S4:** Genes detected by *edgeR* tool as differentially expressed when comparing  
1140 *gluteus medius* expression profiles of fasted *AL-T0* (N = 11) and fed *AL-T2* (N = 12)  
1141 Duroc gilts.

1142

1143 **Table S5:** microRNAs detected by *edgeR* tool as differentially expressed when  
1144 comparing *gluteus medius* expression profiles of fasted *AL-T0* (N = 11) and fed *AL-T2*  
1145 (N = 12) Duroc gilts.

1146

1147 **Table S6:** EISA results for post-transcriptional signals (PTc) detected in *gluteus medius*  
1148 skeletal muscle expression profiles of fasted (*AL-T0*, N = 11) and fed (*AL-T2*, N = 12)  
1149 Duroc gilts.

1150

1151 **Table S7:** Binding sites for differentially upregulated miRNAs found in mRNA genes  
1152 with the top 5% negative PT<sub>c</sub> scores and at least 2-folds reduction in the exonic fraction  
1153 ( $\Delta$ Ex) of *gluteus medius* skeletal muscle expression profiles from fasting (*AL-T0*, N =  
1154 11) and fed (*AL-T2*, N = 12) Duroc gilts.

1155

1156 **Table S8:** Covariation enrichment scores (CES) for the exonic and intronic fractions of  
1157 mRNA genes with the top 5% negative post-transcriptional signals (PTc) and at least 2-  
1158 folds reduction in their exonic ( $\Delta\text{Ex}$ ) fraction, that were putatively targeted by DE  
1159 upregulated miRNAs from *gluteus medius* skeletal muscle expression profiles *AL-T0* vs  
1160 *AL-T2* Duroc gilts (N = 21).

1161

1162 **Table S9:** Genes detected by *edgeR* tool as differentially expressed when comparing  
1163 adipocyte expression profiles from *lean* (N = 5) and *obese* (N = 5) Duroc-Göttingen  
1164 minipigs according to their body mass index (BMI).

1165

1166 **Table S10:** microRNA genes detected by *edgeR* tool as differentially expressed when  
1167 comparing adipocyte expression profiles from *lean* (N = 5) and *obese* (N = 5) Duroc-  
1168 Göttingen minipigs according to their body mass index (BMI).

1169

1170 **Table S11:** mRNA genes with the top 5% post-transcriptional signals (PTc) and at  
1171 least 2-fold exonic fraction ( $\Delta\text{Ex}$ ) reduction (equivalent to -1 in the log2 scale) from  
1172 adipocyte expression profiles of *lean* (N = 5) and *obese* (N = 5) Duroc-Göttingen  
1173 minipigs according to their body mass index (BMI).

1174

1175 **Table S12:** EISA results for post-transcriptional signals (PTc) detected in adipocyte  
1176 expression profiles of *lean* (N = 5) and *obese* (N = 5) Duroc-Göttingen minipigs  
1177 according to their body mass index (BMI).

1178



1179 **Table S13:** Binding sites for differentially upregulated miRNAs found in mRNA genes  
1180 with the top 5% negative PTc scores and at least 2-folds reduction in the exonic fraction  
1181 ( $\Delta\text{Ex}$ ) of adipocyte expression profiles from *lean* (N = 5) and *obese* (N = 5) Duroc-  
1182 Göttingen minipigs according to their body mass index (BMI).

1183

1184 **Table S14:** Covariation enrichment scores (CES) for the exonic and intronic fractions  
1185 of mRNA genes with the top 5% negative post-transcriptional signals (PTc) and at least  
1186 2-folds reduction in their exonic ( $\Delta\text{Ex}$ ) fraction, that were putatively targeted by DE  
1187 upregulated miRNAs from adipocyte expression profiles of *lean vs obese* Duroc-  
1188 Göttingen minipigs (N = 25).

1189

1190

## 1191 **Supplementary Figures**

1192 **Figure S1:** Diagram depicting the consecutive steps implemented for studying miRNA-  
1193 driven post-transcriptional regulatory signals applying the EISA approach and  
1194 additional enrichment and covariation analyses.

1195

1196 **Figure S2:** Scatterplots depicting the exonic ( $\Delta\text{Ex}$ ) and intronic ( $\Delta\text{Int}$ ) fractions from  
1197 *gluteus medius* skeletal muscle expression profiles of fasting (*AL-T0*, N = 11) and fed  
1198 (*AL-T2*, N = 12) Duroc gilts. **(A)** mRNA genes with the top 5% post-transcriptional  
1199 (PTc) negative scores and at least 2-folds reduced exonic ( $\Delta\text{Ex}$ ) fractions (equivalent to  
1200  $-1$  in the  $\log_2$  scale), suggestive of miRNA-driven post-transcriptional regulation. **(B)**  
1201 mRNA genes differentially expressed showing upregulation ( $\text{FC} > 2$ ;  $q\text{-value} < 0.05$ , in  
1202 green) and downregulation ( $\text{FC} < -2$ ,  $q\text{-value} < 0.05$ , in red) in fed (*AL-T2*, N = 12)  
1203 Duroc gilts with respect to their fasted (*AL-T0*, N = 11) counterparts.

1204

1205 **Figure S3:** Enrichment analyses of the number of genes with the (A) top 1% and (B)  
1206 top 5% negative PTC scores and at least 2-fold reduced exonic fractions ( $\Delta Ex$ )  
1207 putatively targeted by upregulated miRNAs ( $FC > 1.5$ ;  $q$ -value  $< 0.05$ ) from *gluteus*  
1208 *medius* skeletal muscle expression profiles of fasting (*AL-T0*,  $N = 11$ ) and fed (*AL-T2*,  
1209  $N = 12$ ) Duroc gilts. Results show the change in enrichment significance when  
1210 incorporating context-based pruning of miRNA binding sites of type 8mer, 7mer-m8  
1211 and 7mer-A1. R: Raw enrichment analyses without any additional context-based  
1212 pruning. AU: Enrichment analyses removing miRNA binding sites without AU-rich  
1213 flanking sequences (30 nts upstream and downstream). M: Enrichment analyses  
1214 removing miRNA binding sites located in the middle of the 3'-UTR sequence (45-  
1215 55%). E: Enrichment analyses removing miRNA binding sites located too close ( $< 15$   
1216 nts) to the beginning or the end of the 3'-UTR sequences. The black dashed line  
1217 represents a  $P$ -value = 0.05.

1218

1219

1220

1221

1222

1223

1224

1225

1226

1227

1228

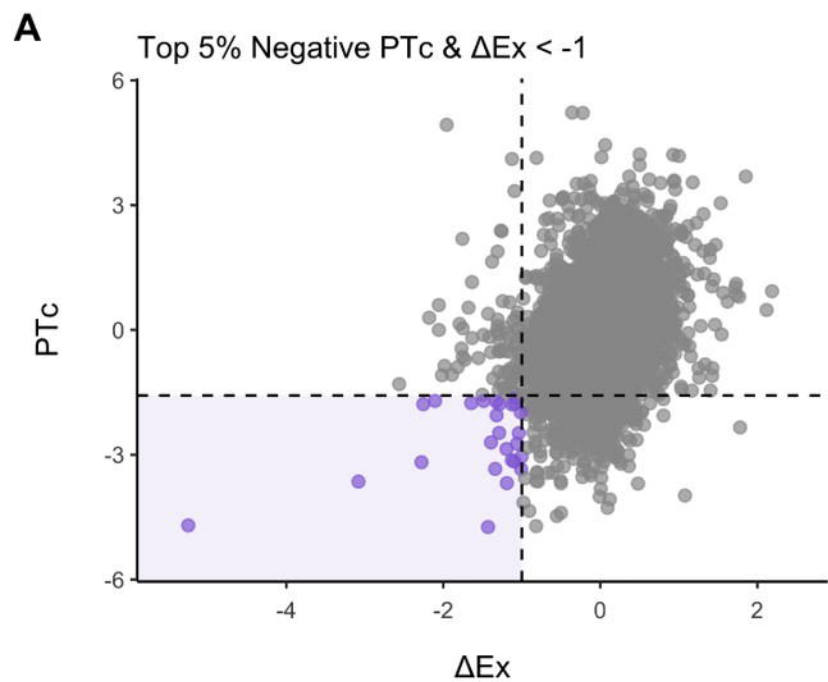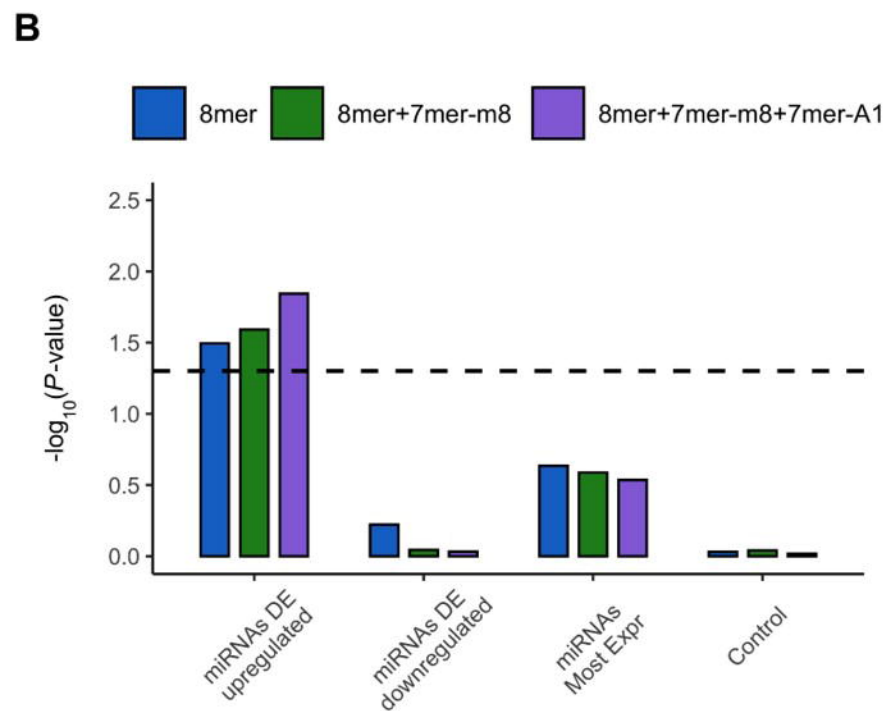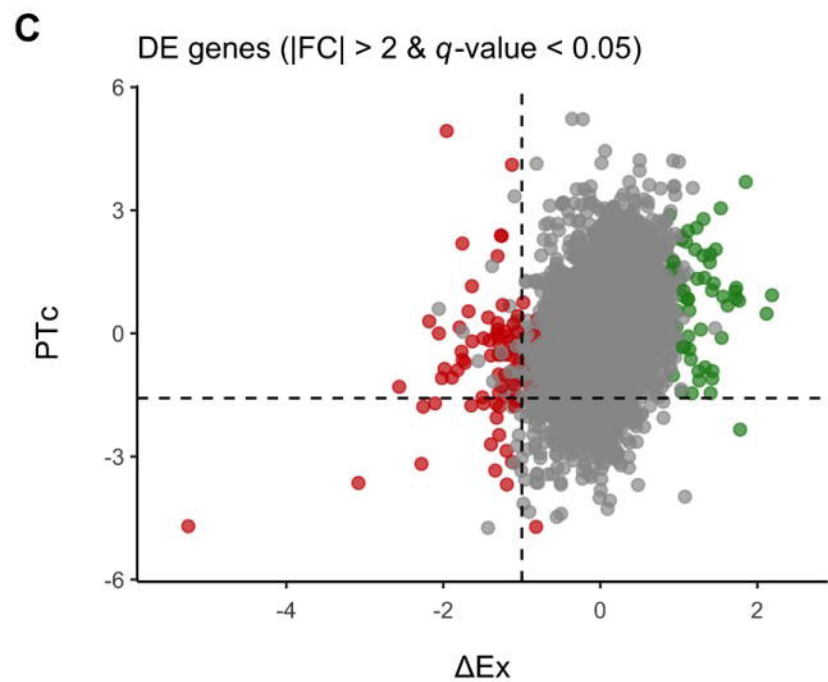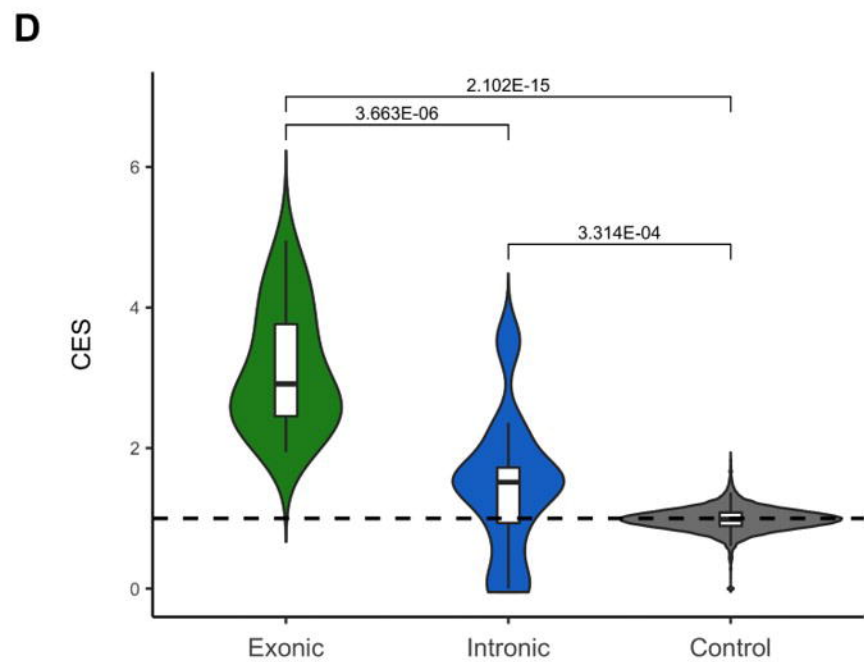

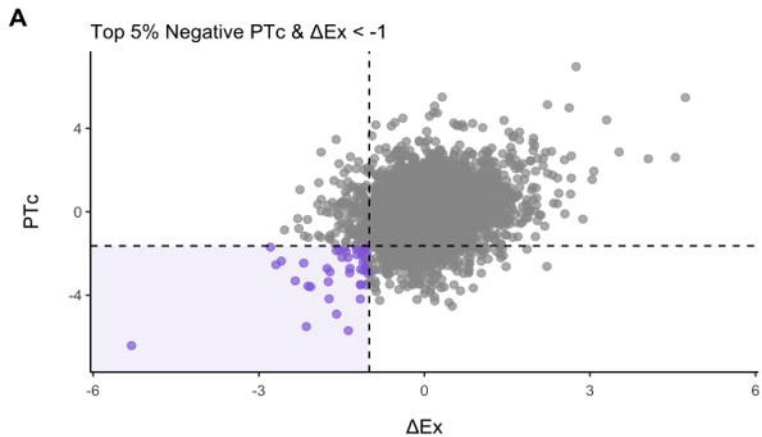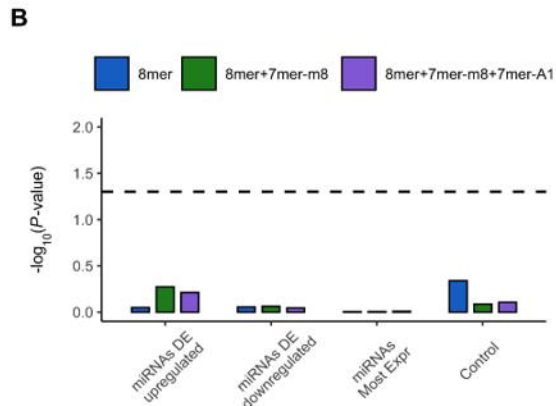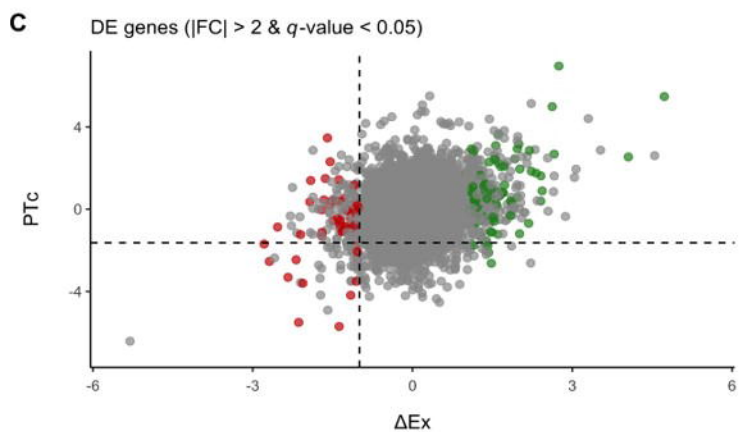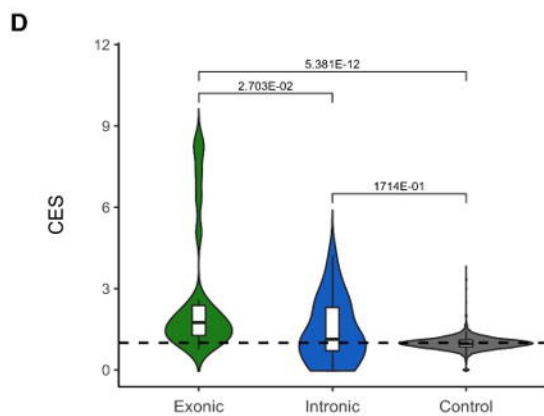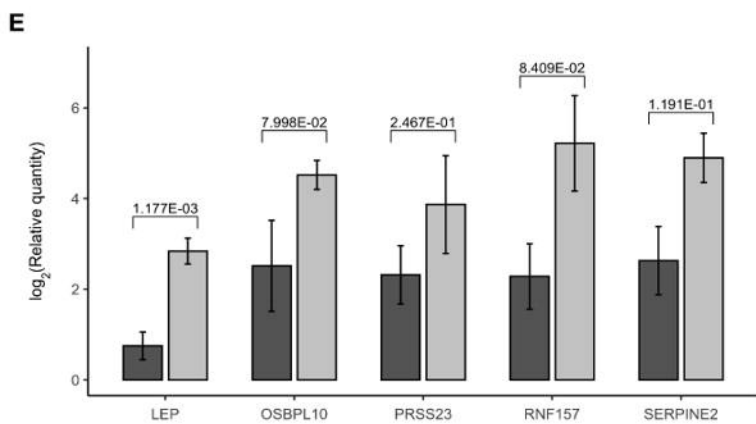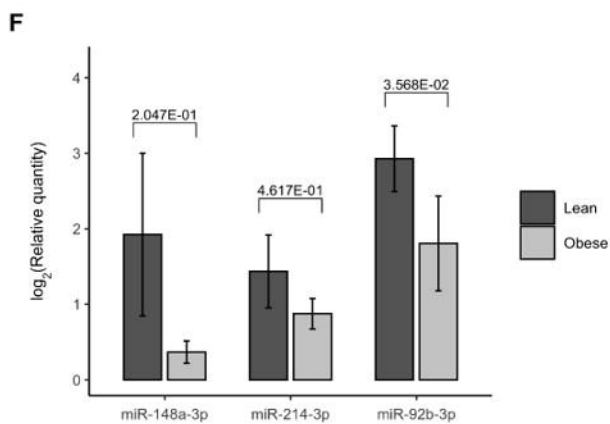

Source: https://www.biorxiv.org/content/10.1101/2021.07.14.452370v4.full.pdf
