1 **An exon-intron split framework to prioritize miRNA-driven post-**  
2 **transcriptional regulatory signals and its application to study energy**  
3 **homeostasis in pigs**

4 Emilio Mármol-Sánchez<sup>1\*</sup>, Susanna Cirera<sup>2</sup>, Laura M. Zingaretti<sup>3</sup>, Mette Juul Jacobsen<sup>2</sup>,  
5 Yulixaxis Ramayo-Caldas<sup>4</sup>, Claus B. Jørgensen<sup>2</sup>, Merete Fredholm<sup>2</sup>, Tainã Figueiredo  
6 Cardoso<sup>1†</sup>, Raquel Quintanilla<sup>4</sup>, Marcel Amills<sup>1,5</sup>

7  
8 <sup>1</sup>Centre for Research in Agricultural Genomics (CRAG), CSIC-IRTA-UAB-UB,  
9 Universitat Autònoma de Barcelona, 08193 Bellaterra, Spain.

10 <sup>2</sup>Department of Veterinary and Animal Sciences, Faculty of Health and Medical  
11 Sciences, University of Copenhagen, 1871 Frederiksberg C, Denmark.

12 <sup>3</sup>Universidad Nacional de Villa María, Villa María, Córdoba, Argentina.

13 <sup>4</sup>Animal Breeding and Genetics Program, Institute for Research and Technology in  
14 Food and Agriculture (IRTA), Torre Marimon, 08140 Caldes de Montbui, Spain.

15 <sup>5</sup>Departament de Ciència Animal i dels Aliments, Universitat Autònoma de Barcelona,  
16 08193 Bellaterra, Barcelona, Spain.

17

18 \*Emilio Mármol-Sánchez current address: Stockholm University, The Wenner-Gren  
19 Institute, Department of Molecular Biosciences, SciLifelab.

20 †Tainã Figueiredo Cardoso current address: Embrapa Pecuária Sudeste, Empresa  
21 Brasileira de Pesquisa Agropecuária (EMBRAPA), 13560-970, São Carlos, SP, Brazil.

22

23 **Corresponding author:** Emilio Mármol-Sánchez. Stockholm University, The Wenner-  
24 Gren Institute, Department of Molecular Biosciences, SciLifelab. Email:

25 [emilio.marmol.sanchez@gmail.com](mailto:emilio.marmol.sanchez@gmail.com)

26 **Abstract**

27 Bulk sequencing of RNA transcripts has typically been used to quantify gene expression  
28 levels and regulatory signals in different experimental systems. However, linking  
29 differentially expressed (DE) mRNA transcripts to gene expression regulators, such as  
30 miRNAs, remains challenging, as miRNA-mRNA interactions are commonly identified  
31 post hoc after selecting sets of genes of interest, thus biasing the interpretation of  
32 underlying gene regulatory networks.

33 In this study, we aimed at disentangling miRNA-driven post-transcriptional signals  
34 using the pig as a model. We performed an exon-intron split analysis (EISA) to muscle  
35 and fat RNA-seq data from two Duroc pig populations subjected to fasting-feeding  
36 conditions and with divergent fatness profiles, respectively. After running EISA  
37 analyses, protein-coding mRNA genes with downregulated exonic fractions and high  
38 post-transcriptional signals were significantly enriched for binding sites of upregulated  
39 DE miRNAs. Moreover, these genes showed an increased expression covariation for the  
40 exonic fraction compared to that of the intronic fraction. On the contrary, they did not  
41 show enrichment for binding sites of highly expressed and/or downregulated DE  
42 miRNAs. Among the set of loci displaying miRNA-driven post-transcriptional  
43 regulatory signals, we observed genes related to glucose homeostasis (*DKK2*, *PDK4*,  
44 *IL18*, *NR4A3*, *CHRNA1*, *TET2*), cell differentiation (*PBX1*, *BACH2*) or adipocytes  
45 metabolism (*LEP*, *ESRRG*, *PTGFR*, *SERPINE2*, *RNF157*, *GPLD1*, *OSBPL10*,  
46 *PRSS23*). Our results highlighted mRNA genes showing post-transcriptional signals  
47 linked to miRNA-driven downregulation by using exonic and intronic fractions of  
48 RNA-seq datasets from muscle and adipose tissues in pigs.

49 **Keywords:**

50 Exon-intron split analysis, microRNA, pigs, energy homeostasis.

## 51 **1. Introduction**

52 RNA dynamics in the cell metabolism are subjected to complex yet poorly characterized  
53 regulatory mechanisms that contribute to shaping fine-tuned biological responses to  
54 different stimuli [1]. Cellular metabolic changes are hence a direct manifestation of  
55 intricate interactions between expressed transcripts and other regulatory elements that  
56 modify their abundance, localization, fate and degradation rate. MicroRNAs (miRNAs)  
57 are primarily engaged in post-transcriptional control of gene expression through  
58 inhibition of translation and/or destabilization of target mRNAs through poly(A)  
59 shortening and subsequent degradation [2]. These short non-coding regulatory RNAs  
60 trigger changes in the abundance of targeted transcripts, which can ultimately be  
61 modelled as covariation patterns that might help unravel direct or indirect molecular  
62 interplays regulating biological pathways.

63 In order to disentangle regulatory functions driven by miRNAs, researchers typically  
64 focus on genes of their interest showing significant changes in mRNA abundance or  
65 protein levels that such regulatory effectors might putatively target. This approach,  
66 however, introduces *post hoc* selection of deregulated genes and *ad hoc* search of  
67 predicted interactions between the 3'-UTRs of mRNAs and the seed regions of  
68 miRNAs, causing a bias that may obscure other minor but relevant regulatory  
69 interactions [2–4].

70 Several studies have addressed the effects of post-transcriptionally perturbed genes in  
71 expression datasets [5–7], or how transcriptional dynamics can reflect the cellular  
72 transition between homeostasis and stress-induced responses or differentiation stages  
73 [8–11]. In an attempt to capture both regulatory components based on expression data,  
74 Gaidatzis *et al.* [5] described the use of intronic mapping sequences as direct indicators  
75 of primary mRNA oscillations related to transcriptional activation. This study was

76 based on early reports describing intronic expression as a proxy of nascent transcription  
77 and co-transcriptional splicing events [12–14]. Besides, the post-transcriptional effect  
78 was defined as a function of the expressed exonic and intronic fraction [5]. Although  
79 many studies have took advantage of this approach to discern transcriptional and post-  
80 transcriptional responses within co-expressed mRNAs and their corresponding putative  
81 regulators [5–7], its application remains limited.

82 In the present study, we aimed to characterize miRNA-driven post-transcriptional  
83 signals in skeletal muscle in response to nutrient boost after food intake. We also  
84 explored post-transcriptional regulatory signals in adipose tissue using an independent  
85 pig population with divergent fatness profiles and qPCR analyses for cross-validation.  
86 Using a set of expression data from RNA-seq and miRNA-seq experiments, we  
87 predicted in silico miRNA-mRNA interactions and we then evaluated the perturbed  
88 expression status of relevant genes at the post-transcriptional level beyond canonical  
89 differential expression analyses. In this way, we were able to disentangle hidden  
90 regulatory effects driven by miRNA post-transcriptional regulation contributing to  
91 modulating energy usage, glucose homeostasis and lipids metabolism in the skeletal  
92 muscle and adipose tissue of pigs.

93

94

## 95 **2. Materials and methods**

### 96 **2.1. Experimental design and tissue collection**

97 Expression data and experimental conditions employed to infer gene covariation  
98 networks and regulatory connections were previously described in [15–17]. In brief, two  
99 independent experimental designs comprising expression profiles from mRNAs and  
100 miRNAs in Duroc pigs were used:

101 (i) The transcriptomic profile of *gluteus medius* (GM) skeletal muscle samples from a  
102 total of 23 Duroc gilts were measured employing RNA-seq and small RNA-seq  
103 sequencing using the same biological material as reported in [15,17,18]. All gilts were  
104 fed *ad libitum* during their productive lives [15,18] until reaching ~150 days of age and  
105 they were subsequently slaughtered at the IRTA Experimental Slaughterhouse in  
106 Monells (Girona, Spain) following Spanish welfare regulations. Prior to slaughtering,  
107 all animals were fasted during 12 h. Gilts were then divided in two fasting/feeding  
108 regimes, *i. e.* 11 gilts (*AL-T0*) were slaughtered in fasting conditions upon arrival at the  
109 abattoir, whereas the rest of the animals were slaughtered immediately after 7 h (*AL-T2*,  
110 N =12) with access to *ad libitum* feed intake. After slaughtering, *gluteus medius* skeletal  
111 muscle samples were collected, conserved in RNAlater solution (Thermo Fisher  
112 Scientific, Barcelona, Spain) and subsequently snap-frozen in liquid nitrogen.

113 (ii) A total of 10 Duroc-Göttingen minipig inter-cross F2 animals with divergent fatness  
114 profiles according to body mass index (BMI) metric (*5 lean* and *5 obese*) were selected  
115 from the UNIK resource population comprising a total of 502 F2 pigs [19,20], as  
116 described in Jacobsen et al. 2019 [16]. Pigs were slaughtered when they reach 8-13  
117 months of age according to the Danish “Animal Maintenance Act” (Act 432 dated  
118 09/06/2004). Tissue samples from retroperitoneal tissue of each animal were collected  
119 and mature adipocytes were isolated following the protocol of Decaunes et al. 2011 [21]  
120 with modifications as reported by Jacobsen et al. 2019 [16]. Once extracted, adipocyte  
121 pellets were snap-frozen at -80°C until further experimental procedures.

122

## 123 **2.2. RNA extraction and sequencing**

124 RNA extraction, RNA-Seq and small RNA-Seq sequencing protocols, quality-check  
125 preprocessing and mapping were performed as previously described [15–17]. In brief,

126 total RNA was isolated from GM tissue using the RiboPure kit (Ambion, Austin, TX),  
127 while for RNA from adipocytes, the protocol from Cirera et al. 2013 [22] specifically  
128 adapted to adipose tissue was implemented. Sequencing libraries were prepared with  
129 dedicated TruSeq stranded total RNA kits (Illumina Inc. CA) [16,17] and paired-end  
130 sequenced in a HiSeq 2000 equipment (Illumina Inc. CA). Small RNA-specific libraries  
131 were prepared from total RNA isolates following the TruSeq Small RNA Sample  
132 Preparation Kit (Illumina Inc., CA) and subjected to single-end (1 x 50 bp) sequencing  
133 in a HiSeq 2500 equipment (Illumina Inc., CA).

134

### 135 **2.3. Quality check, filtering and mapping of sequences**

136 Sequenced reads from RNA-Seq and small RNA-Seq data sets belonging to both fasting  
137 and fed Duroc gilts, as well as to lean and obese Duroc-Göttingen minipigs, were  
138 trimmed to remove any remaining sequencing adapters and quality-checked with the  
139 Cutadapt software [23]. Subsequently, reads were mapped against the Sscrofa11.1  
140 porcine reference assembly with the HISAT2 aligner [24] and default parameters for  
141 RNA-Seq reads, and with the Bowtie Alignment v.1.2.1.1 software [25] using small  
142 sequence reads specifications (*bowtie -n 0 -l 25 -m 20 -k 1 --best --strata*) for small  
143 RNA-Seq reads, respectively.

144

### 145 **2.4. Exon/Intron quantification**

146 We generated exonic and intronic ranges spanning all gene annotations available using  
147 the gtf formatted Sscrofa.11.1 v.103 gene annotation file retrieved from Ensembl  
148 repositories ([http://ftp.ensembl.org/pub/release-103/gtf/sus\\_scrofa/](http://ftp.ensembl.org/pub/release-103/gtf/sus_scrofa/)). Overlapping  
149 intronic/exonic regions, as well as singleton positions were removed from intronic  
150 ranges [26]. To avoid the counting of exonic reads mapping close to exon/intron

151 junctions that could bias the quantification of intronic regions, we removed 10 basepairs  
152 (bp) from both sides of each intronic range.

153 Once the corresponding exonic and intronic ranges for Sscrofa11.1 v.103 were retrieved,  
154 we used the featureCounts function within the Rsubread package [27] to quantify gene  
155 expression profiles based on exon/intron expression patterns for each gene. MiRNA  
156 expression profiles were extracted from small RNA-Seq sequencing data using the  
157 Sscrofa11.1 v.103 mature miRNA annotation with featureCounts software tool [28] in  
158 single-end mode and with default parameters.

159

## 160 **2.5. Exon/intron split analysis (EISA) for assessing post-transcriptional effects on** 161 **gene expression**

162 We applied EISA analyses to differentiate gene expression regulation based on post-  
163 transcriptional effects [5–7]. To this end, we separately estimated the exonic/intronic  
164 abundance of each annotated mRNA gene using the Sscrofa11.1 v.103 exon/intron  
165 custom annotation ranges previously generated. Only genes showing average expression  
166 values above 1 count-per-million (CPM) in at least 50% of animals were retained for  
167 further analyses.

168 Counts were processed following the methods described in Gaidatzis *et al.* [5].

169 Normalization was performed independently for exon and intron counts by multiplying  
170 each  $i^{th}$  gene expression in each  $j^{th}$  sample by the corresponding mean gene expression  
171 and dividing by the total number of quantified counts per sample.

172 Normalized and expression filtered gene abundances for exonic and intronic ranges  
173 were subsequently transformed in the  $\log_2$  scale, adding a pseudo-count of 1.  
174 Exon/intron  $\log_2$  transformed abundances for each gene were averaged within each

175 considered treatment groups (*AL-T0* and *AL-T2* for GM tissues and *lean* and *obese* for  
176 adipocyte isolates).

177 Only genes with successful exonic and intronic quantified read counts were further  
178 considered in our analyses, hence removing mono-exonic genes and poliexonic genes  
179 where exonic and/or intronic expression was undetected. The transcriptional component  
180 (Tc) contribution to observed differences in each  $i^{th}$  gene expression levels between  
181 contrast groups was expressed as the increment of intron counts in fed (*AL-T2*) and  
182 *obese* animals with respect to fasting (*AL-T0*) and *lean* animals, respectively, denoted as  
183  $\Delta Int = Int_{2i} - Int_{1i}$ . The increment of exonic counts  $\Delta Ex$  was defined accordingly, and  
184 the post-transcriptional component (PTc) effect was expressed as  $\Delta Ex - \Delta Int = (Ex_{2i} -$   
185  $Ex_{1i}) - (Int_{2i} - Int_{1i})$ . Both components were z-scored to represent comparable ranges  
186 between  $\Delta Ex$  and  $\Delta Int$  estimates. Post-transcriptional expected effects according to  $\Delta Ex$   
187 and PTc ( $\Delta Ex - \Delta Int$ ) distribution are depicted in **Fig. S1A**. The classification and  
188 interpretation of the combinatorial possibilities among  $\Delta Ex$ ,  $\Delta Int$  (Tc) and  $\Delta Ex - \Delta Int$   
189 (PTc) values explored in the current work are shown in **Fig. S1B**. All implemented  
190 analyses have been summarized in **Fig. S1C**. A ready-to-use modular pipeline for  
191 running EISA is publicly available at <https://github.com/emarmolsanchez/EISACompR>.

192

## 193 **2.6. Post-transcriptional signal prioritization**

194 In order to obtain a prioritized list of genes showing meaningful signals of post-  
195 transcriptional regulatory activity, the top 5% genes with the highest negative PTc  
196 scores were retrieved for each of the two experimental contrasts (i.e., *AL-T0* vs *AL-T2*  
197 from Duroc GM muscle and *lean* vs *obese* from UNIK Duroc-Göttingen adipocytes).  
198 We only focused on genes showing strong reduced  $\Delta Ex$  values  $> 2$  folds for post-  
199 transcriptional signals in *AL-T0* vs *AL-T2* animals and reduced  $\Delta Ex > 3$  folds in *lean* vs



200 *obese* animals. The higher fold change in exonic fractions used for the *lean vs obese*  
201 experimental design was motivated by the overall weaker differential expression  
202 obtained at both mRNA and miRNA levels for these data sets. MiRNAs act as post-  
203 transcriptional repressors of targeted mRNAs were considered as the main effectors of  
204 the observed mRNA downregulation.

205

## 206 **2.7. Differential expression and significance of regulatory signals**

207 Canonical differential expression analyses were carried out with the *edgeR* package [29]  
208 using the exonic fraction of mRNAs and miRNA expression profiles from RNA-Seq  
209 and small RNA-Seq data sets comprising *AL-T0 vs AL-T2* and *lean vs obese contrasts*.  
210 Expression filtered raw counts for exonic reads were normalized with the trimmed mean  
211 of M-values normalization (TMM) method [30]. Subsequently, after dispersion  
212 estimation with a Cox-Reid profile-adjusted likelihood method [31], a generalized log-  
213 linear model of the negative binomial distribution was fitted and significance in  
214 expression differences was tested with a quasi-likelihood F-test implemented in the  
215 *glmQLFit* function from *edgeR* method [29]. Correction for multiple hypothesis testing  
216 was applied using the Benjamini-Hochberg false discovery rate approach [32]. Genes  
217 were considered as differentially expressed (DE) when they had  $|FC| > 2$  and  $q$ -value  $<$   
218  $0.05$  for mRNAs, and  $|FC| > 1.5$  and  $q$ -value  $< 0.05$  for miRNAs.

219 The statistical significance of the post-transcriptional (PTc) component variation  
220 between groups (*AL-T0 vs AL-T2* and *lean vs obese*) was evaluated using *edgeR* and  
221 incorporating the intronic quantification as an interaction factor for exonic abundances.  
222 In this way we accounted for the previous intronic variation effect on the differences  
223 shown at the exonic level for the mature mRNA after intron splicing.

224

## 225 **2.8. miRNA target prediction**

226 Target interactions between the seed regions of expressed miRNAs from small RNA-  
227 seq datasets and 3'-UTRs of expressed protein-coding mRNA genes from RNA-seq  
228 datasets were assessed on the basis of sequence identity using the Sscrofa11.1 reference  
229 assembly. The annotated 3'-UTRs from porcine mRNAs were retrieved from  
230 Sscrofa11.1 v.103 available at bioMart database (<http://www.ensembl.org/biomart>) and  
231 miRBase database [33]. The 3'-UTR sequences shorter than 30 nts were discarded.  
232 Redundant seeds from mature porcine microRNAs were removed.

233 The seedVicious v1.1 tool [34] was used to infer miRNA-mRNA interactions against  
234 the non-redundant set of porcine miRNA seeds and 3'-UTRs retrieved from the  
235 Sscrofa11.1 v.103 annotation ([http://ftp.ensembl.org/pub/release-103/gtf/sus\\_scrofa/](http://ftp.ensembl.org/pub/release-103/gtf/sus_scrofa/)).

236 MiRNA-mRNA interactions of type 8mer, 7mer-m8 and 7mer-A1 were considered as  
237 the most relevant and potentially functional among the set of other alternative non-  
238 canonical occurring interactions [2,35,36]. Following early reports about the effects of  
239 miRNA binding site context in determining the miRNA-mRNA interaction efficacy  
240 [35], we removed *in silico*-predicted miRNA-mRNA interactions complying with any  
241 of the following criteria: (i) Binding sites are located in 3'-UTRs at less than 15 nts  
242 close to the end of the ORF (and the stop codon) or less than 15 nts close to the terminal  
243 poly(A) tail, (ii) binding sites are located in the middle of the 3'-UTR in a range  
244 comprising 45-55% of the central body of the non-coding sequence and (iii) binding  
245 sites lack AU-rich elements in their immediate upstream and downstream flanking  
246 regions comprising 30 nts each.

247 Covariation patterns between miRNAs and their predicted mRNA targets at gene-wise  
248 level were assessed on the basis of Spearman's correlation coefficients ( $\rho$ ) using the  
249 TMM normalized and  $\log_2$  transformed expression profiles of the exonic fractions of

250 mRNA and miRNA genes. Only miRNA-mRNA predicted pairs comprising DE  
251 upregulated miRNAs ( $FC > 1.5$ ;  $q$ -value  $< 0.05$ ) and mRNA genes with relevant PTC  
252 scores (see post-transcriptional signal prioritization section) were taken into  
253 consideration. Correlations were considered significant at  $P$ -value  $< 0.05$ .

254

## 255 **2.9. Gene-wise miRNA enrichment analyses**

256 After the identification of mRNA genes showing marked post-transcriptional signals in  
257 both experimental conditions considered and the prediction of putative miRNA binding  
258 sites in their 3'-UTRs, we sought to determine if the overall number of mRNA genes  
259 (gene-wise) targeted by at least one of the upregulated miRNAs ( $FC > 1.5$ ;  $q$ -value  $<$   
260  $0.05$ ) was significantly enriched. The whole sets of expressed mRNA genes with  
261 available 3'-UTRs from both *AL-T0* vs *AL-T2* and *lean* vs *obese* datasets were used as a  
262 contrast background for statistical significance of enrichment analyses, which were  
263 carried out using the Fisher's exact test implementation included in the *fisher.test* R  
264 function. Results were considered significant at  $P$ -value  $< 0.05$ .

265 Besides, we also tested whether these genes were enriched for binding sites of the top 5%  
266 most highly expressed miRNA genes, excluding the significantly upregulated DE  
267 miRNAs, as well as for binding sites of significantly downregulated miRNAs ( $FC <$   
268  $1.5$ ;  $q$ -value  $< 0.05$ ). Upregulated or downregulated miRNAs showing redundant seeds  
269 were considered as one single binding site event. Given the relatively low significant  
270 differences in miRNA expression obtained for the small RNA-Seq profiles of UNIK  
271 Duroc-Gottingen minipigs (*lean* vs *obese*), miRNAs were considered upregulated at  
272  $FC > 1.5$  and  $P$ -value  $< 0.01$  for such experimental setup.

273 As a control test, we implemented a randomized bootstrap corrected iteration to  
274 generate 100 random sets of 10 expressed mature miRNA genes without seed

275 redundancy. These sets of miRNAs were used as input for miRNA target prediction  
276 with the sets of prioritized mRNA genes with the top 5% P<sub>Tc</sub> scores as previously  
277 described. The distribution of odds ratios obtained after iterating over each random set  
278 of miRNAs (N = 100) were then compared with odds ratios obtained with the set of  
279 significantly upregulated miRNAs (FC > 1.5; *q*-value < 0.05).

280 The *P*-value for the significance of the deviation of observed odds ratios against the  
281 bootstrapped odds ratios distribution was defined as,  $P - value = 1 - \frac{r+1}{k+1}$ , where *r*  
282 is the number of permuted odds ratios with values equal or higher than the observed  
283 odds ratio for enrichment analyses with the set of upregulated miRNAs, and *k* is the  
284 number of defined permutations (N = 100).

285

## 286 **2.10. Gene covariation network and covariation enrichment score**

287 We hypothesized that genes showing relevant post-transcriptional downregulatory  
288 effects might be regulated by the same set of significantly upregulated miRNAs, which  
289 could induce shared covariation in their expression profiles at the exonic level. On the  
290 contrary, their intronic fractions would be mainly unaffected, as introns would have  
291 been excised prior to any given miRNA-driven downregulation, if occurring. In this  
292 way, an increased gene covariation might be detectable within the sets of commonly  
293 targeted mRNA genes with relevant post-transcriptional signals at the exon but not at  
294 the intron level, as opposed to covariation events of these set of genes with the rest of  
295 DE genes.

296 In order to test such hypothesis, we computed pairwise correlation coefficients among  
297 the whole set of DE mRNA genes in the *AL-T0* vs *AL-T2* (*q*-value < 0.05, N = 454) and  
298 *lean* vs *obese* (*q*-value < 0.05, N = 299) experimental contrasts, with respect to the set  
299 of genes with relevant post-transcriptional signals and putatively targeted by DE

300 upregulated miRNAs. Normalized exonic and intronic estimates in the  $\log_2$  scale  
301 obtained from EISA analyses were used to compute Spearman's correlation coefficients  
302 ( $\rho$ ) for each possible pair of DE mRNA genes plus those with post-transcriptional  
303 signals but not DE ( $q$ -value  $> 0.05$ ), excluding self-correlation pairs. Significant  
304 covariation events were identified with the Partial Correlation with Information Theory  
305 (PCIT) network inference algorithm [37] implemented in the *pcit* R package [38]. Non-  
306 significant covarying pairs were set to zero, while significant covarying pairs with both  
307 positive or negative coefficients  $|\rho| > 0.6$  were assigned a value of 1.  
308 The functional regulatory implications of miRNAs in shaping covariation patterns were  
309 then assessed by a covariation enrichment score (CES) following Tarbier et al. 2020  
310 [39]. Significant differences among the set of exonic, intronic and control CES values  
311 were tested with a non-parametric approach using a Mann-Whitney U non-parametric  
312 test [40]. Further details about CES calculation and implementation can be found in  
313 **Supplementary Methods File S1.**

314

### 315 **2.11. Expression analyses of miRNAs and putative mRNA targets by qPCR**

316 Retroperitoneal adipose tissue (~20 ml) was taken from the abdominal cavity of UNIK  
317 intercrossed Duroc-Göttingen minipigs pigs quickly after slaughtering (more details  
318 about UNIK minipig population are described elsewhere [19,20]). We then isolated  
319 adipocyte cells as described in Jacobsen et al. 2019 [16] and they were used for RNA  
320 extraction following the method of Cirera (2013) [22]. Total RNA from adipocytes was  
321 subsequently employed for quantitative real-time polymerase chain reaction (qPCR)  
322 verification of expression changes. Five mRNAs (*LEP*, *OSBLP10*, *PRSS23*, *RNF157*  
323 and *SERPINE2*) among the top 5% with the highest negative P<sub>Tc</sub> values and showing  
324 reduced  $\Delta$ Ex higher than 3-fold (equivalent to -1.58 in the  $\log_2$  scale) were selected for

325 expression profiling. The same 5 *lean* and 5 *obese* animals (according to BMI profiles,  
326 **Table S1**) used for RNA-Seq and small RNA-seq analyses [16,41] were selected, with  
327 the exception of animal 572, for which no additional RNA was available and that was  
328 replaced by animal 503, which had the closest BMI profile within the *obese* group of  
329 animals (**Table S1**). Two reference genes (*TBP* and *ACTB*, according to Nygard et al.  
330 2007 [42]) were used as normalizers. Primers were collected from available stocks from  
331 previous studies [42,43] or designed using the PRIMER3 software within the PRIMER-  
332 BLAST tool [44], considering exon–exon junction spanning primers for poly-exonic  
333 candidates and accounting for multiple transcript capture when possible.

334 Accordingly, three miRNAs among the most significantly differentially expressed in  
335 small RNA sequencing data from UNIK samples were selected for qPCR profiling (*ssc-*  
336 *miR-92b-3p*, *ssc-miR-148a-3p* and *ssc-miR-214-3p*), plus two miRNAs for  
337 normalization which were among the most highly expressed and with no differential  
338 expression signal in the *lean vs obese* small RNA-Seq data set (*ssc-let-7a* and *ssc-miR-*  
339 *23a-3p*). The same RNA samples used for mRNA profiling were subsequently  
340 processed for microRNA profiling using 50 ng of total RNA for cDNA synthesis in  
341 duplicate and following the protocol for microRNAs of Balcells et al. 2011 [45] with  
342 recommendations reported by Cirera & Busk 2014 [46]. Primers for miRNA qPCR  
343 amplification were designed using the miRprimer software [47]. Further details about  
344 qPCR experimental procedures are available in **Supplementary Methods File S1**. All  
345 primers for mRNA and miRNA expression profiling are available at **Table S2**. Raw Cq  
346 values for each assay are available at **Table S3**.

347

348

349

## 350 **3. Results**

### 351 **3.1. Determining post-transcriptional signals in porcine skeletal muscle using the** 352 **EISA approach**

353 After the processing, mapping and quantification of mRNA and miRNA gene  
354 expression profiles in GM skeletal muscle samples encompassing 11 fasting (*AL-T0*)  
355 and 12 fed (*AL-T2*) Duroc gilts, an average of 45.2 million reads per sample (~93%)  
356 were successfully mapped to annotated genes (N = 31,908, including protein coding and  
357 non-coding genes) in the Sscrofa11.1 v.103 assembly. Besides, around 2.2 million reads  
358 per sample (~42%) from an average of 6.2 million small RNA sequences mapped to  
359 annotated porcine miRNA genes (N = 370).

360 A total of 30,322 genes based on exonic regions and 22,769 genes based on intronic  
361 regions were successfully quantified after splitting the reference Sscrofa11.1 v.103  
362 assembly between exonic and intronic ranges. The reduced number of genes for intronic  
363 ranges was produced upon the removal of singleton regions, mono-exonic genes and  
364 exon-overlapping intronic ranges that could disturb the accurate determination of  
365 intronic fractions.

366 The exonic fraction accounted for an average of 1,923.94 estimated counts per gene,  
367 whereas the intronic fraction was represented by an average of 83.02 counts per gene,  
368 meaning that counts in exonic ranges exceeded those in intronic ranges by ~23 fold.

369 EISA analyses were run using exonic and intronic fractions from the *AL-T0* vs *AL-T2*  
370 contrast excluding genes with expression levels below 1 CPM in at least 50% of the  
371 samples (N = 12). Only genes represented by both exonic and intronic mapping counts  
372 were retained, resulting in a total of 9,492 mRNA genes used for determining  $\Delta\text{Ex}$  and  
373  $\Delta\text{Int}$  values and using the fasting group (*AL-T0*) as baseline control, i.e., any given  
374 upregulation in  $\Delta\text{Ex}$  or  $\Delta\text{Int}$  values represents and overexpression in fed (*AL-T2*) over

375 fasting (*AL-T0*) Duroc gilts. Finally, PTC scores were obtained from z-scored values of  
376  $\Delta\text{Ex} - \Delta\text{Int}$  estimates and differential expression analyses based on exonic fractions  
377 were carried out using the 9,492 genes retrieved.

378 Differential expression analyses resulted in a total of 454 DE genes ( $q$ -value  $< 0.05$ ),  
379 and of those, only genes with  $|\text{FC}| > 2$  were retained, totaling 52 upregulated and 80  
380 downregulated genes (**Table S4, Fig. S2A**). Besides, differential expression analyses on  
381 small RNA-seq data for *AL-T0* vs *AL-T2* pigs revealed a total of 16 DE miRNAs ( $|\text{FC}| >$   
382  $1.5$ ;  $q$ -value  $< 0.05$ ), of which 8 were upregulated (representing 6 unique miRNA seeds,  
383 **Table S5**). The non-redundant seeds of miRNAs with significantly differential  
384 upregulation in fed *AL-T2* animals ( $N = 6$ ; ssc-miR-148a-3p, ssc-miR-7-5p, ssc-miR-  
385 30-3p, ssc-miR-151-3p, ssc-miR-374a-3p and ssc-miR-421-5p, **Table S5**) were selected  
386 as those potentially affecting genes post-transcriptionally after nutrient supply. Post-  
387 transcriptional signal analyses revealed a total of 133 genes with significant post-  
388 transcriptional effects ( $|\text{FC}| > 2$ ;  $q$ -value  $< 0.05$ , **Table S6**), of which three had reduced  
389  $\Delta\text{Ex}$  fractions  $> 2$  folds and two of them had significantly negative PTC scores ( $q$ -value  
390  $< 0.05$ , **Table 1**).

391 From these results, we aimed at determining relevant genes putatively downregulated  
392 by miRNAs at the post-transcriptional level. Genes within the top most extreme 5%  
393 negative PTC scores with visibly reduced  $\Delta\text{Ex}$  values  $> 2$  folds were selected as genes  
394 showing putative miRNA-driven post-transcriptional downregulation (**Fig. S2B**). This  
395 resulted in a total of 26 selected genes (**Table 1**), from which one of them did not have a  
396 3'-UTR annotated (ENSSSCG00000049158) and was hence excluded from miRNA  
397 seed target prediction at the 3'-UTR level. Among this set of 26 genes with high post-  
398 transcriptional signals, 18 of them were also downregulated considering canonical  
399 differential expression analyses on their exonic fractions ( $\text{FC} < -2$ ;  $q$ -value  $< 0.05$ ,



400 **Table 1** and **Table S4**), while three additional genes showed suggestive yet not  
401 evidently significant downregulation ( $P$ -value < 0.01, **Table 1** and **Table S4**).

402

### 403 **3.2. Context-based pruning of predicted miRNA-mRNA interactions removes** 404 **spurious unreliable target events**

405 As a first step to determine if genes with highly negative P<sub>Tc</sub> scores and showing a  
406 marked reduction in exonic fractions were possibly affected by the repressor activity of  
407 upregulated DE miRNAs (**Table S5**), we aimed to investigate the accuracy and  
408 reliability of *in silico* predicted miRNA binding sites in their 3'-UTRs (**Table S7**).

409 We evaluated the presence of enriched binding sites gene-wise over a random  
410 background of expressed genes with no context-based removal of predicted binding  
411 sites, applying each one of the three established removal criteria independently (see  
412 methods), and combining them pairwise and altogether. As depicted in **Fig. S3A** and  
413 **S3B**, introducing additional context-based filtering criteria for removing spurious  
414 unreliable binding site predictions resulted in an overall increased enrichment of  
415 miRNA targeted genes within the top 1% (**Fig. S3A**) and 5% (**Fig. S3B**) negative P<sub>Tc</sub>  
416 scores and with reduced  $\Delta Ex > 2$  folds. This increased enrichment significance was  
417 more prevalent for the AU-rich-based criterion, and was slightly improved when adding  
418 the other two context-based removal criteria (**Fig. S3A**). These results were, however,  
419 less evident for the list of the top 5% genes (**Fig. S3B**), probably due to the reduced  
420 stringency of gene prioritization and the inclusion of putative false positive candidate  
421 genes that are not targeted by the non-redundant seeds of detected upregulated miRNAs  
422 ( $N = 6$ , **Table S5**). Nevertheless, still an increased enrichment was detectable for all  
423 combined filtering criteria, especially for binding sites of type 7mer-A1, and probably at  
424 the expense of the scarcer and more efficient 8mer binding sites.

425 Supported by the observed increased reliability of retrieved miRNA binding sites and  
426 targeted genes after context-based site pruning, we applied the three joint  
427 aforementioned criteria for further target enrichment analyses.

428

### 429 **3.3. Genes with relevant post-transcriptional signals are enriched for putative** 430 **miRNA binding sites in their 3'-UTRs.**

431 Target prediction and context-based pruning of miRNA-mRNA interactions for mRNA  
432 genes with the top 5% negative PTc scores and a reduction in the exonic fraction ( $\Delta\text{Ex}$ )  
433 of at least 2 folds ( $N = 25$  after excluding ENSSSCG00000049158) resulted in a total of  
434 11 binding sites of type 8mer, 21 of type 7mer-m8 and 22 of type 7mer-A1 (**Table S7**)  
435 belonging to non-redundant seeds of DE upregulated miRNAs ( $N = 6$ ) in *AL-T2* gilts  
436 (**Table S5**).

437 Furthermore, we aimed at investigating if these genes showing putative post-  
438 transcriptional signals were enriched for miRNA-derived target events at the gene-wide  
439 level (i.e., assessing whether the number of these genes being putative targets of  
440 upregulated miRNAs were significantly higher compared with a random background).  
441 The set of genes with the top 5% ( $N = 25$ , **Fig. 1A**) PTc scores and reduced  $\Delta\text{Ex} > 2$   
442 folds obtained significant enrichment results ( $P\text{-value} < 0.05$ ) for 8mer, 7mer-m8 and  
443 7mer-A1 targeted genes (**Fig. 1B**), and this was especially relevant for all target types  
444 combined. More importantly, 21 out of 25 genes from the top 5% PTc scores (**Table**  
445 **S7**) were predicted as putative targets for miRNAs upregulated in *AL-T2* fed gilts  
446 (**Table S5**), the majority of which were concentrated among those with the highest PTc  
447 scores (**Table 1**). The gene with the highest post-transcriptional signal was the Dickkopf  
448 WNT Signaling Pathway Inhibitor 2 (*DKK2*, **Table 1**), and was the only gene gathering  
449 two miRNA binding sites of type 8mer simultaneously (**Table S7**). Other genes with the

450 top PTC score that gathered multiple miRNA binding sites were, to mention a few,  
451 pyruvate dehydrogenase kinase 4 (*PDK4*), interleukin 18 (*IL18*), nuclear receptor  
452 subfamily 4 group A member 3 (*NR4A3*) or cholinergic receptor nicotinic  $\alpha 1$  subunit  
453 (*CHRNA1*). The most relevant miRNAs gathering the highest amount of significant  
454 miRNA-mRNA interactions in terms of their correlation patterns were ssc-miR-30a-3p  
455 and ssc-miR-421-5p, which showed 9 and 8 significant miRNA-mRNA interactions,  
456 followed by ssc-miR-148-3p with a total of 4 significant interactions among the set of  
457 mRNA genes with post-transcriptional signals (**Table S7**).

458 A special case was represented by the ENSSSCG00000049158 gene (**Table 1** and  
459 **Table S8**), with no 3'-UTR available in the Sscrofa11.1 annotation. Interestingly, this  
460 gene has a relatively long and fragmented 5'-UTR, and we decided to investigate  
461 whether putative miRNA targets could happen in this region. No context-based filtering  
462 was implemented for these analyses. Surprisingly, we found a total of 7 and 9 binding  
463 sites (**Table S8**) for the set of DE upregulated miRNAs (**Table S5**) across the two  
464 annotated transcripts of this gene, respectively.

465 We also evaluated the gene-wise enrichment for this set of genes ( $N = 25$ , **Table 1**) with  
466 the following sets of miRNAs: (i) Non-redundant seeds from downregulated miRNAs in  
467 *AL-T2* fed gilts (ssc-miR-1285, ssc-miR-758, ssc-miR-339, sc-miR-22-3p, ssc-miR-  
468 296-5p, ssc-miR-129a-3p, ssc-miR-181c and ssc-miR-19b, **Table S5**), (ii) the top 5%  
469 most expressed non-redundant miRNA seeds, excluding those being upregulated, if  
470 present (ssc-miR-1, ssc-miR-133a-3p, ssc-miR-26a, ssc-miR-10b, ssc-miR-378, ssc-  
471 miR-99a-5p, ssc-miR-27b-3p, ssc-miR-30d, ssc-miR-486 and ssc-let-7f-5p) and (iii) for  
472 an iteration ( $N = 100$ ) of random sets of 10 expressed miRNAs, irrespective of their DE  
473 and abundance status, as a control test. None of these additional analyses recovered a

474 significant enrichment for any type of the three considered miRNA target subtypes (**Fig.**  
475 **1B**).

476 To exclude the possibility that any additional DE downregulated mRNA genes (**Table**  
477 **S4**) were also putatively regulated by miRNAs, removing those previously analyzed for  
478 post-transcriptional signals (which were not necessarily downregulated in a significant  
479 manner), we also repeated our enrichment analyses for binding sites on this set of genes  
480 with 3'-UTR available (N = 48). When we analyzed the enrichment of the number of  
481 DE downregulated genes (**Fig. 1C**) being putative targets of upregulated, downregulated  
482 or highly expressed miRNAs, no significant results were observed, except for a slight  
483 enrichment of genes targeted for highly expressed miRNAs considering 8mer + 7mer-  
484 m8 binding sites only (**Fig. 1D**).

485

#### 486 **3.4. Studying post-transcriptional signals in adipocytes metabolism using an** 487 **independent Duroc-Göttingen minipig population**

488 We decided to evaluate the performance of EISA analyses on the miRNA target  
489 prioritization using an additional independent experimental setup with the adipocyte  
490 mRNA and miRNA expression profiles of a Duroc-Göttingen minipig population with  
491 divergent fatness profiles well characterized at the metabolic and molecular level  
492 [19,20]. A total of 10 animals divided into two groups of 5 animals each with high and  
493 low BMI profiles (*lean vs obese*, **Table S1**) were selected for sequencing of adipocyte  
494 homogenates collected from retroperitoneal adipose tissue. After pre-processing and  
495 filtering of sequenced reads, an average of ~98.1 and ~0.87 million mRNA and small  
496 RNA reads per sample were generated, of which ~96.5% and ~73.4% mapped to  
497 annotated porcine mRNA and miRNA genes, respectively. Differential expression  
498 analyses revealed a total of 299 DE mRNAs ( $q$ -value < 0.05), of which 52 mRNAs were

499 downregulated and 95 were upregulated ( $|\text{FC}| > 2$ ;  $q$ -value  $< 0.05$ ), respectively (**Table**  
500 **S9**). Regarding miRNAs, only one gene (ssc-miR-92b-3p) was significantly upregulated  
501 in *lean* pigs ( $|\text{FC}| > 2$ ;  $q$ -value  $< 0.05$ ), while 7 additional miRNAs showed suggestive  
502 differential expression ( $P$ -value  $< 0.01$ , **Table S10**).

503 After running EISA analyses on the mRNA expression profiles for exonic and intronic  
504 fractions, a total of 15 downregulated mRNAs in *lean* pigs were among the top 5% PTC  
505 scores with reduced  $\Delta\text{Ex} > 3$  folds (**Table 2, Fig. 2A**). The whole set of mRNA genes  
506 from PTC EISA analyses is available at **Table S11**. A total of 12 out of the initial 15  
507 mRNA genes were then classified as putative miRNA targets from the set of  
508 upregulated miRNA genes in *lean* pigs (ssc-miR-92b-3p, ssc-miR-148a-3p, ssc-miR-  
509 204 and ssc-miR-214-3p; **Table S10**), respectively. Among these, it is worth  
510 mentioning leptin (*LEP*), oxysterol binding protein like 10 (*OSBPL10*), serine protease  
511 23 (*PRSS23*), ring finger protein 157 (*RNF157*), serpin family E member 2  
512 (*SERPINE2*), estrogen related receptor  $\gamma$  (*ESRRG*) or prostaglandin F receptor  
513 (*PTGFR*). Moreover, the number of obtained miRNA-mRNA interactions were 1 of  
514 type 8mer, 10 of type 7mer-m8 and 11 of type 7mer-A1 (**Table S12**). The strongest  
515 covariation patterns among miRNAs and targeted mRNAs were those between ssc-miR-  
516 204, ssc-miR-214-3p and ssc-miR92b-3p (**Table S12**), which were also the miRNAs  
517 showing the more relevant significant differences in overexpression in *lean* pigs (**Table**  
518 **S10**).

519 Gene-wise enrichment analyses for the set of putative miRNA target genes with post-  
520 transcriptional signals ( $N = 12$ , **Table 2** and **Table S12**) revealed a slight yet consistent  
521 enrichment for miRNA targets of type 7mer-m8 and 7mer-A1, although it did not reach  
522 significant levels ( $P$ -value  $> 0.05$ , **Fig. 2B**). Nonetheless, these binding sites showed  
523 suggestive enrichment compared to analyses assessing the presence of enriched miRNA

524 target genes with the set of downregulated miRNAs in *lean* pigs (ssc-miR-190a and ssc-  
525 miR-1839-5p), as well as with those within the top 5% most highly expressed miRNAs  
526 (**Table S10, Fig. 2B**).

527 Furthermore, in order to validate the results obtained for mRNAs with high post-  
528 transcriptional signals and the miRNAs putatively interacting with them, we selected 5  
529 mRNAs (*LEP*, *OSBPL10*, *PRSS23*, *RNF157* and *SERPINE2*) and 3 miRNAs (ssc-miR-  
530 148a-30, ssc-miR-214-3p and ssc-miR-92b-3p) for qPCR expression profiling  
531 verification. All the analyzed mRNA genes showed a reduced expression in *lean* pigs  
532 compared with their *obese* counterparts (**Fig. 2C**) and the *LEP* gene was the most  
533 significantly downregulated gene ( $P$ -value = 1.12E-10), a result that was in agreement  
534 with the strong downregulation observed in differential expression analyses of the  
535 RNA-Seq data set (**Table S9**). With regard to miRNAs, the opposite expression  
536 pattern was revealed, with all the three profiled miRNA genes being upregulated in *lean*  
537 pigs. Moreover, as described in the small RNA-Seq differential expression results  
538 (**Table S10**), the ssc-miR-92b-3p gene was the miRNA with the most significant  
539 upregulation observed in qPCR analyses ( $P$ -value = 3.57E-02, **Fig. 2D**).

540

### 541 **3.5. Genes showing post-transcriptional regulatory signals predominantly covary** 542 **at the exonic level.**

543 To further elucidate whether genes with top 5% post-transcriptional regulatory signals  
544 could account for truly targeted genes by miRNAs according to in silico predictions ( $N$   
545 = 21), we evaluated the covariation patterns among them and with the whole set of DE  
546 mRNA genes ( $q$ -value < 0.05,  $N$  = 454) in our RNA-seq data from *AL-T0* and *AL-T2*  
547 gilts. In this way, if a set of genes were to be downregulated by any upregulated  
548 miRNAs in a coordinated manner, we would expect a reduced abundance in their

549 mature spliced mRNA forms, i.e., only the exonic fractions but not the intronic fractions  
550 might predominantly covary. The intronic fraction, eventually spliced and degraded in  
551 the nucleus, should not reflect any posterior post-transcriptional regulatory effects in the  
552 cytoplasm, and a reduced or null covariation in their abundances might be expected.

553 Using CES values previously described for the top 5% mRNA genes with highest  
554 negative PTC scores, reduced  $\Delta\text{Ex}$  fractions  $> 2$  folds and putatively targeted by DE  
555 upregulated miRNAs ( $N = 21$ ), we obtained an estimation of the fold change in their  
556 observed covariation with respect to other DE mRNAs ( $N = 435$ ), and this was  
557 measured for both their exonic and their intronic abundances. Our analyses revealed that  
558 set of mRNA genes with the top 5% negative PTC scores and reduced  $\Delta\text{Ex} > 2$  folds  
559 predicted as miRNA targets ( $N = 21$ , **Table S7**) of upregulated miRNAs ( $N = 6$ , **Table**  
560 **S5**) showed an average significantly increased covariation of  $\sim 2$  folds in their exonic  
561 fractions compared with their intronic fractions (**Fig. 3A**). When we analyzed the  
562 observed fold change in covariation for random sets of genes iteratively ( $N = 1,000$ ),  
563 they fell towards null covariation changes, i.e.,  $\text{CES} \approx 1$  (**Fig. 3A**). The observed CES  
564 distributions of exonic, intronic and control sets were significantly different after  
565 running non-parametric tests (**Fig. 3A**), thus supporting the expected predominant effect  
566 at the exon level by miRNA-driven post-transcriptional downregulation.

567 In agreement with results obtained for the *AL-T0* vs *AL-T2* contrast, an increased  
568 covariation of  $\sim 2$  folds was also observed for exonic and intronic fractions of putatively  
569 targeted mRNA genes ( $N = 12$ ) by DE upregulated miRNAs in the *lean* vs *obese*  
570 contrast, although not at a significant level (**Fig. 3B**).

571 Moreover, 19 out of 21 (*AL-T0* vs *AL-T2*) and 9 out of 12 (*lean* vs *obese*) analyzed  
572 mRNA genes putatively targeted by DE upregulated miRNAs showed an overall  
573 increased covariation in their exonic fractions compared with their intronic fractions,

574 expressed as the increment in their CES values ( $\Delta\text{CES} = \text{exonic CES} - \text{intronic CES}$ ,  
575 **Table S13**). From these, the mRNA genes with a highest fold change increment in  
576 exonic covariation were, to mention a few, the Dickkopf WNT Signaling Pathway  
577 Inhibitor 2 (*DKK2*), which also had the highest post-transcriptional signal (**Table 1**),  
578 leucine rich repeat neuronal 1 (*LRRN1*), PBX homeobox 1 (*PBX1*), cholinergic receptor  
579 nicotinic  $\alpha 1$  subunit (*CHRNA1*), Tet methylcytosine dioxygenase 2 (*TET2*), 6-  
580 Phosphofructo-2-Kinase/Fructose-2,6-Biphosphatase 3 (*PFKFB3*) or nuclear receptor  
581 subfamily 4 group A member 3 (*NR4A3*) for the *AL-T0* vs *AL-T2* contrast, as well as  
582 glycosylphosphatidylinositol specific phospholipase D1 (*GPLD1*), tumor protein P53  
583 inducible protein 11 (*TP53I11*), serine protease 23 (*PRSS23*) or estrogen related  
584 receptor  $\gamma$  (*ESRRG*) for the *lean* vs *obese* contrast.

585

586

## 587 **4. Discussion**

588 In the present study we have applied an exon/intron split approach [5], which provides  
589 an unbiased methodology to prioritize mRNA genes showing post-transcriptional  
590 downregulatory signals linking them to upregulated miRNAs that might be targeting  
591 these mRNAs and triggering their observed decay in differential expression analyses.

592 Motivated by the notion that genes showing strong downregulation in exonic variance  
593 ( $\Delta\text{Ex}$ ) between groups, combined with highly negative PTc scores ( $\Delta\text{Ex} - \Delta\text{Int}$ ), would  
594 represent a proxy for post-transcriptionally regulated genes, we selected those mRNAs  
595 showing a reduced exonic fraction while also having highly negative PTc scores. The  
596 strong downregulation observed in  $\Delta\text{Ex}$  values would exceed that observed in the  $\Delta\text{Int}$   
597 fraction, resulting in a lack of intronic downregulation that might result from post-  
598 transcriptional changes only at the exonic level after mRNA splicing in the nucleus.



599 We observed that the majority of mRNA genes with highly negative PTc scores, i.e.,  
600 predominantly downregulated at their exonic fractions, also had a coordinated  
601 downregulatory effect in their intronic fractions, taken as a proxy of transcriptional  
602 repression. This was evidenced by the overall low significance of post-transcriptional  
603 signals within the mRNA genes with the top 5% negative PTc scores and reduced  $\Delta Ex$   
604 in both analyzed experimental conditions (**Tables 1** and **2**). It is worth noting that we  
605 did not consider the significance of PTc scores as a relevant criterion for prioritizing  
606 putative post-transcriptionally downregulated genes, as these will appear as significant  
607 only when the post-transcriptional activity was the unique mechanism modulating the  
608 target gene expression profile. Only co-occurring yet opposite transcriptional and post-  
609 transcriptional events or single post-transcriptional signals would arise as significant,  
610 excluding those genes with both coordinated downregulation at the post-transcriptional  
611 level. Only two genes (*DKK2* and *NAV2*) in the *AL-T0* vs *AL-T2* contrast showed  
612 significant PTc scores ( $q$ -value < 0.05, **Table 1**), revealing the overall coordinated  
613 downregulatory effect at transcriptional and post-transcriptional level we found, which  
614 is in agreement with previous reports using EISA [6,7].

615 Since the efficacy of miRNA targeting depends on the context of the target site within  
616 the 3'-UTR [35], we have described the usefulness of introducing context-based  
617 filtering criteria for removing spurious in silico-predicted target sites for miRNAs. The  
618 increase in enrichment significance shown for targeted mRNAs with post-  
619 transcriptional signals and upregulated miRNAs, as opposed to other highly expressed  
620 and/or downregulated miRNAs, highlighted the ability of such criteria to discriminate  
621 and remove weak or false positive target sites located within unfavored regions of the  
622 3'-UTR. However, highly efficient target sites such as those of type 8mer, although  
623 scarcer than 7mer-m8 sites, might still be functional even at unfavored positions

624 [35,48,49], which may partially explain the relative lack of 8mer sites found in the top  
625 post-transcriptionally regulated mRNA genes.

626 We opted for using the intronic fraction of expressed mRNAs as a proxy of their  
627 transcriptional activity. In this way, the intronic fraction might reflect an approximation  
628 to transcriptional activity of yet unspliced mRNA transcripts leading to the  
629 accumulation of intronic sequences prior to their debranching and degradation by  
630 exonucleases. Previous reports have also explored the use of specific techniques to  
631 capture nascent transcripts before they are spliced [8,50,51], and these have been used  
632 to account for the transcriptional activity in a similar approach to EISA [52]. The use of  
633 intronic fractions as a signal of transcription allows the use of RNA-seq datasets to  
634 apply EISA without the need of further experimental procedures and it can also be  
635 applied to investigate transcriptional regulatory signals [7]. Nevertheless, the use of  
636 more advanced methodologies to measure transient transcription of mRNAs might  
637 provide a better resolution for future experimental designs [52], while EISA would be  
638 still useful to explore already available RNA-seq data.

639 From the analysis of top mRNA genes showing the strongest post-transcriptional  
640 downregulatory effects in fasted (*AL-T0*) vs fed (*AL-T2*) gilts, relevant biological  
641 functions putatively regulated by miRNAs were highlighted. The *DKK2* gene was the  
642 one showing the highest negative P<sub>Tc</sub> score, and its post-transcriptional regulatory  
643 signal was also significant (**Table 1**), meaning that no additional coordinated  
644 transcriptional downregulation was found for this particular gene. Moreover, this gene  
645 also showed the strongest covariation difference in its exonic fraction compared with its  
646 intronic fraction (**Table S13**). This consistent post-transcriptional regulatory effect  
647 might be explained by the presence of two miRNA target sites of type 8mer in its 3'-  
648 UTR for ssc-miR-421-5p and ssc-miR-30a-3p, two differentially upregulated miRNAs

649 in the same experimental setup (**Table S5**). Besides, ssc-miR-30e-3p, a miRNA sharing  
650 its seed and regulatory effect with ssc-miR-30a-3p, was also upregulated in fed (*AL-T2*)  
651 gilts, which would reinforce the repression of the mRNA transcripts. The *DKK2* gene is  
652 a member of the dickkopf family that inhibits the Wnt signaling pathway through its  
653 interaction with the LDL-receptor related protein 6 (*LRP6*). Its repression has been  
654 associated with reduced blood-glucose levels and improved glucose uptake [53], as well  
655 as with improved adipogenesis [54] and inhibition of aerobic glycolysis [55]. Moreover,  
656 the miR-493-5p, a miRNA that was also upregulated in fed gilts (**Table S5**) although  
657 only at nominal level, has been shown to directly regulate its expression [55]. These  
658 results would be in agreement with the increased glucose usage and triggered  
659 adipogenesis in muscle tissue after nutrient supply. Other additional relevant post-  
660 transcriptionally downregulated mRNA genes worth mentioning are: *PDK4*, a  
661 mitochondrial enzyme that inhibits pyruvate to acetyl-CoA conversion thus hindering  
662 glucose utilization and that promotes fatty acids oxidation in energy-deprived cells  
663 under fasting conditions [56,57], *IL18*, a proinflammatory interleukin involved in  
664 controlling energy homeostasis in the muscle by inducing AMP-activated protein kinase  
665 (AMPK) [58], a master metabolic regulator that is suppressed upon nutrient influx in  
666 cells [59], *NR4A3*, an orphan nuclear receptor that activates both glycolytic and  
667 glycogenic factors [60], as well as  $\beta$ -oxidation in muscle cells [61], *CHRNA1*, the  $\alpha$   
668 subunit of the nicotinic cholinergic receptor of muscle cells, whose repression was  
669 linked to the inhibition of nicotine-dependent *STAT3* upregulation [62], a transcription  
670 factor that promotes insulin resistance in muscle [63], *PBX1*, a stage-specific regulator  
671 of adipocyte differentiation [64], *TET2*, a tumor suppressor linked to glucose-dependent  
672 AMPK phosphorylation [65] and BTB domain and CNC homolog (*BACH2*), whose  
673 inhibition is directly associated with mTOR complex 2 (mTORC2) glucose-dependent

674 activation [66,67] and the repression of forkhead box protein O1 (*FOXO1*) [68] and  
675 *PDK4* in a coordinated manner [17,69]. Overall, the highlighted downregulated genes in  
676 the muscle of fed gilts after nutrient supply pointed towards a common regulatory  
677 function of miRNAs in modulating glucose uptake and energy homeostasis of the  
678 skeletal myocytes.

679 Although miRNAs were the major post-transcriptional regulators that we considered in  
680 this study, it is important to remark that other additional post-transcriptional  
681 modifications and interactions might be responsible of the observed downregulation of  
682 mRNAs [70–74]. This could explain the presence of non-miRNA targets within the top  
683 post-transcriptional signals, as well as additional regulatory mechanisms not directly  
684 involved in energy homeostasis or glucose usage among the highlighted genes. For  
685 instance, three circadian clock-related mRNA genes that showed high post-  
686 transcriptional signals were the circadian associated repressor of transcription (*CIART*),  
687 period 1 (*PER1*) and salt inducible kinase 1 (*SIK1*), yet the first two were not detected  
688 as targets of differentially expressed miRNAs, as shown in **Table 1**. As previously  
689 reported for this experimental design [15], the presence of several genes showing  
690 abundance differences might reflect a tight feedback interplay among them, where their  
691 expression and accumulation are coordinately regulated.

692 Regarding EISA analyses in RNA-seq profiles of adipocytes from lean and obese  
693 Duroc-Göttingen minipigs, several of the mRNA genes that showed high post-  
694 transcriptional repression were involved in lipids metabolism and the regulation of  
695 energy homeostasis. For instance, the gene showing the highest post-transcriptional  
696 signal was *ESRRG*, an orphan nuclear receptor that modulates oxidative metabolism and  
697 mitochondrial function in adipose tissue and that results in the downregulation of  
698 adipogenic markers and adipocyte differentiation when repressed [75]. The

699 prostaglandin F2- receptor protein (PTGFR) overexpression has been associated with  
700 hypertension and obesity-related risks [76], and its repression improved insulin  
701 sensitivity and glucose homeostasis [77]. High expression of *SERPINE2* gene and its  
702 paralog *SERPINE1* were linked to obesogenic states and diabetic symptoms [78], while  
703 their inhibition improved glucose metabolism [79]. The serine protease PRSS23  
704 regulates insulin sensitivity and cytokine expression in adipose tissue, and its  
705 downregulation confers protective effects against inflammation, reduced fasting glucose  
706 level and improved insulin resistance [80], while a high expression of *RNF157* has been  
707 described in adipose tissue with high fatness profiles and increased autophagy [81].  
708 Silencing of ORP10 protein, encoded by the *OSBLP10* gene, promotes low-density  
709 lipoprotein (LDL) synthesis and inhibits lipogenesis [82]. The serum levels of GPLD1,  
710 the gene showing the highest increase in covariation at the exonic fraction (**Table S13**),  
711 are regulated by insulin and glucose metabolism [83] and linked to the development of  
712 insulin resistance and metabolic syndrome [84]. Finally, leptin production was also  
713 decreased in lean pigs compared to their obese counterparts, and was among the top  
714 post-transcriptionally regulated mRNA genes. This adipokine is mainly produced in  
715 adipose tissue [85] and regulates appetite, energy expenditure and body weight [86,87].  
716 In summary, similar to what we found for glucose metabolism and energy homeostasis  
717 in fasted vs fed Duroc pigs, we were also able to describe a set of post-transcriptionally  
718 regulated genes in lean vs obese minipigs related to adipose tissue metabolism  
719 regulation dependent of their fatness profiles.

720

721

722

723

## 724 **5. Conclusions**

725 In this study we have implemented an exon/intron split analysis of RNA-seq data from  
726 skeletal muscle and adipose tissue of pigs, in order to disentangle miRNA-driven post-  
727 transcriptional signals that are not evident from the solely analysis of differentially  
728 expressed mRNAs comparing divergent experimental conditions. In this way, we were  
729 able to prioritize regulatory relationships between upregulated miRNAs and their  
730 putative mRNA targets. We demonstrated that incorporating context-based pruning of  
731 in silico-predicted miRNA targets increased the reliability of the putative miRNA-  
732 mRNA interactions. Besides, these downregulated mRNAs with relevant post-  
733 transcriptional signals were significantly enriched for being cooperatively targeted by a  
734 set of upregulated miRNAs, as opposed to other highly expressed and/or downregulated  
735 miRNAs. The majority of these genes showed an average of 2-folds increase in  
736 expression covariation in their exonic fractions compared to their intronic fractions, a  
737 result that reinforced their putative post-transcriptional downregulation by miRNA-  
738 driven transcript decay. Our results highlight an efficient framework to prioritize  
739 mRNA genes showing post-transcriptional signals linked to miRNA-driven  
740 downregulation using exonic and intronic fractions of commonly available RNA-seq  
741 datasets.

742

## 743 **Support**

744 The present research work was funded by grants AGL2013-48742-C2-1-R and  
745 AGL2013-48742-C2-2-R awarded by the Spanish Ministry of Economy and  
746 Competitiveness. E. Mármol-Sánchez was funded with a PhD fellowship FPU15/01733  
747 awarded by the Spanish Ministry of Education and Culture (MECD).

748

749 **Conflict of interest**

750 The authors declare no conflict of interest.

751

752 **Acknowledgements**

753 The authors would like to thank the Department of Veterinary Animal Sciences in the  
754 Faculty of Health and Medical Sciences of the University of Copenhagen for providing  
755 sequencing data and their facilities and resources for RT-qPCR experiments. We also  
756 acknowledge Selección Batallé S.A. for providing animal material and the Spanish  
757 Ministry of Economy and Competitivity for the Center of Excellence Severo Ochoa  
758 2016-2019 (SEV-2015-0533) grant awarded to the Center for Research in Agricultural  
759 Genomics (CRAG). Thanks also to the CERCA Programme of the Generalitat the  
760 Catalunya for their support.

761

762

763 **References**

- 764 [1] N.J. Martinez, A.J.M. Walhout, The interplay between transcription factors and  
765 microRNAs in genome-scale regulatory networks, *BioEssays*. 31 (2009) 435–  
766 445. doi:10.1002/bies.200800212.
- 767 [2] D.P. Bartel, Metazoan microRNAs, *Cell*. 173 (2018) 20–  
768 51. doi:10.1016/j.cell.2018.03.006.
- 769 [3] D. Baek, J. Villén, C. Shin, F.D. Camargo, S.P. Gygi, D.P. Bartel, The impact of  
770 microRNAs on protein output, *Nature*. 455 (2008) 64–71.  
771 doi:10.1038/nature07242.
- 772 [4] M.S. Ebert, P.A. Sharp, Roles for microRNAs in conferring robustness to  
773 biological processes, *Cell*. 149 (2012) 515–524. doi:10.1016/j.cell.2012.04.005.

- 774 [5] D. Gaidatzis, L. Burger, M. Florescu, M.B. Stadler, Analysis of intronic and  
775 exonic reads in RNA-seq data characterizes transcriptional and post-  
776 transcriptional regulation, *Nat. Biotechnol.* 33 (2015) 722–729.  
777 doi:10.1038/nbt.3269.
- 778 [6] J. Cursons, K.A. Pillman, K.G. Scheer, P.A. Gregory, M. Foroutan, S. Hediye-  
779 Zadeh, J. Toubia, E.J. Crampin, G.J. Goodall, C.P. Bracken, M.J. Davis,  
780 Combinatorial targeting by microRNAs co-ordinates post-transcriptional control  
781 of EMT, *Cell Syst.* 7 (2018) 77-91.e7. doi:10.1016/j.cels.2018.05.019.
- 782 [7] K.A. Pillman, K.G. Scheer, E. Hackett-Jones, K. Saunders, A.G. Bert, J. Toubia,  
783 H.J. Whitfield, S. Sapkota, L. Sourdin, H. Pham, T.D. Le, J. Cursons, M.J. Davis,  
784 P.A. Gregory, G.J. Goodall, C.P. Bracken, Extensive transcriptional responses  
785 are co-ordinated by microRNAs as revealed by Exon–Intron Split Analysis  
786 (EISA), *Nucleic Acids Res.* 47 (2019) 8606-8619. doi:10.1093/nar/gkz664.
- 787 [8] L.J. Core, J.J. Waterfall, J.T. Lis, Nascent RNA sequencing reveals widespread  
788 pausing and divergent initiation at human promoters, *Science.* 322 (2008) 1845–  
789 1848. doi:10.1126/science.1162228.
- 790 [9] Y.L. Khodor, J. Rodriguez, K.C. Abruzzi, C.-H.A. Tang, M.T. Marr, M.  
791 Rosbash, Nascent-seq indicates widespread cotranscriptional pre-mRNA splicing  
792 in *Drosophila.*, *Genes Dev.* 25 (2011) 2502–12. doi:10.1101/gad.178962.111.
- 793 [10] A. Zeisel, W.J. Köstler, N. Molotski, J.M. Tsai, R. Krauthgamer, J. Jacob-Hirsch,  
794 G. Rechavi, Y. Soen, S. Jung, Y. Yarden, E. Domany, Coupled pre-mRNA and  
795 mRNA dynamics unveil operational strategies underlying transcriptional  
796 responses to stimuli., *Mol. Syst. Biol.* 7 (2011) 529. doi:10.1038/msb.2011.62.
- 797 [11] G. La Manno, R. Soldatov, A. Zeisel, E. Braun, H. Hochgerner, V. Petukhov, K.  
798 Lidschreiber, M.E. Kastrioti, P. Lönnerberg, A. Furlan, J. Fan, L.E. Borm, Z. Liu,



- 799 D. van Bruggen, J. Guo, X. He, R. Barker, E. Sundström, G. Castelo-Branco, P.  
800 Cramer, I. Adameyko, S. Linnarsson, P. V Kharchenko, RNA velocity of single  
801 cells., *Nature*. 560 (2018) 494–498. doi:10.1038/s41586-018-0414-6.
- 802 [12] A. Ameer, A. Zaghlool, J. Halvardson, A. Wetterbom, U. Gyllensten, L.  
803 Cavelier, L. Feuk, Total RNA sequencing reveals nascent transcription and  
804 widespread co-transcriptional splicing in the human brain., *Nat. Struct. Mol.*  
805 *Biol.* 18 (2011) 1435–40. doi:10.1038/nsmb.2143.
- 806 [13] J.M. Gray, D.A. Harmin, S.A. Boswell, N. Cloonan, T.E. Mullen, J.J. Ling, N.  
807 Miller, S. Kuersten, Y.-C. Ma, S.A. McCarroll, S.M. Grimmond, M. Springer,  
808 SnapShot-Seq: a method for extracting genome-wide, in vivo mRNA dynamics  
809 from a single total RNA sample., *PLoS One*. 9 (2014) e89673.  
810 doi:10.1371/journal.pone.0089673.
- 811 [14] G.-J. Hendriks, D. Gaidatzis, F. Aeschmann, H. Großhans, Extensive oscillatory  
812 gene expression during *C. elegans* larval development., *Mol. Cell*. 53 (2014)  
813 380–92. doi:10.1016/j.molcel.2013.12.013.
- 814 [15] T.F. Cardoso, R. Quintanilla, J. Tibau, M. Gil, E. Mármol-Sánchez, O. González-  
815 Rodríguez, R. González-Prendes, M. Amills, Nutrient supply affects the mRNA  
816 expression profile of the porcine skeletal muscle, *BMC Genomics*. 18 (2017)  
817 603. doi:10.1186/s12864-017-3986-x.
- 818 [16] M.J. Jacobsen, J.H. Havgaard, C. Anthon, C.M.J. Mentzel, S. Cirera, P.M.  
819 Krogh, S. Pundhir, P. Karlskov-Mortensen, C.S. Bruun, P. Lesnik, M. Guerin, J.  
820 Gorodkin, C.B. Jørgensen, M. Fredholm, R. Barrès, Epigenetic and  
821 transcriptomic characterization of pure adipocyte fractions from obese pigs  
822 identifies candidate pathways controlling metabolism, *Front. Genet.* 10 (2019)  
823 1268. doi:10.3389/fgene.2019.01268.

- 824 [17] E. Mármol-Sánchez, Y. Ramayo-Caldas, R. Quintanilla, T.F. Cardoso, R.  
825 González-Prendes, J. Tibau, M. Amills, Co-expression network analysis predicts  
826 a key role of microRNAs in the adaptation of the porcine skeletal muscle to  
827 nutrient supply, *J. Anim. Sci. Biotechnol.* 11 (2020) 10. doi:10.1186/s40104-019-  
828 0412-z.
- 829 [18] M. Ballester, M. Amills, O. González-Rodríguez, T.F. Cardoso, M. Pascual, R.  
830 González-Prendes, N. Panella-Riera, I. Díaz, J. Tibau, R. Quintanilla, Role of  
831 AMPK signalling pathway during compensatory growth in pigs, *BMC Genomics.*  
832 19 (2018) 682. doi:10.1186/s12864-018-5071-5.
- 833 [19] L.J.A. Kogelman, H.N. Kadarmideen, T. Mark, P. Karlskov-Mortensen, C.S.  
834 Bruun, S. Cirera, M.J. Jacobsen, C.B. Jørgensen, M. Fredholm, An F2 pig  
835 resource population as a model for genetic studies of obesity and obesity-related  
836 diseases in humans: Design and genetic parameters, *Front. Genet.* 4 (2013) 29.  
837 doi:10.3389/fgene.2013.00029.
- 838 [20] S.D. Pant, P. Karlskov-Mortensen, M.J. Jacobsen, S. Cirera, L.J.A. Kogelman,  
839 C.S. Bruun, T. Mark, C.B. Jørgensen, N. Grarup, E.V.R. Appel, E.A.A.  
840 Galjatovic, T. Hansen, O. Pedersen, M. Guerin, T. Huby, P. Lesnik, T.H.E.  
841 Meuwissen, H.N. Kadarmideen, M. Fredholm, Comparative analyses of QTLs  
842 influencing obesity and metabolic phenotypes in pigs and humans, *PLoS One.* 10  
843 (2015) e0137356. doi:10.1371/journal.pone.0137356.
- 844 [21] P. Decaunes, D. Estève, A. Zakaroff-Girard, C. Sengenès, J. Galitzky, A.  
845 Bouloumié, Adipose-derived stromal cells: cytokine expression and immune cell  
846 contaminants., *Methods Mol. Biol.* 702 (2011) 151–161. doi:10.1007/978-1-  
847 61737-960-4\_12.
- 848 [22] S. Cirera, Highly efficient method for isolation of total RNA from adipose

- 849 tissue., *BMC Res. Notes.* 6 (2013) 472. doi:10.1186/1756-0500-6-472.
- 850 [23] M. Martin, Cutadapt removes adapter sequences from high-throughput  
851 sequencing reads, *EMBnet.Journal.* 17 (2011) 10. doi:10.14806/ej.17.1.200.
- 852 [24] D. Kim, B. Langmead, S.L. Salzberg, HISAT: a fast spliced aligner with low  
853 memory requirements, *Nat. Methods.* 12 (2015) 357–360.  
854 doi:10.1038/nmeth.3317.
- 855 [25] B. Langmead, C. Trapnell, M. Pop, S.L. Salzberg, Ultrafast and memory-efficient  
856 alignment of short DNA sequences to the human genome, *Genome Biol.* 10  
857 (2009) R25. doi:10.1186/gb-2009-10-3-r25.
- 858 [26] M. Lawrence, W. Huber, H. Pagès, P. Aboyoun, M. Carlson, R. Gentleman, M.T.  
859 Morgan, V.J. Carey, Software for computing and annotating genomic ranges,  
860 *PLoS Comput. Biol.* 9 (2013) e1003118. doi:10.1371/journal.pcbi.1003118.
- 861 [27] Y. Liao, G.K. Smyth, W. Shi, The R package Rsubread is easier, faster, cheaper  
862 and better for alignment and quantification of RNA sequencing reads, *Nucleic  
863 Acids Res.* 47 (2019) e47–e47. doi:10.1093/nar/gkz114.
- 864 [28] Y. Liao, G.K. Smyth, W. Shi, featureCounts: an efficient general purpose  
865 program for assigning sequence reads to genomic features, *Bioinformatics.* 30  
866 (2014) 923–930. doi:10.1093/bioinformatics/btt656.
- 867 [29] M.D. Robinson, D.J. McCarthy, G.K. Smyth, edgeR: a Bioconductor package for  
868 differential expression analysis of digital gene expression data., *Bioinformatics.*  
869 26 (2010) 139–40. doi:10.1093/bioinformatics/btp616.
- 870 [30] M.D. Robinson, A. Oshlack, A scaling normalization method for differential  
871 expression analysis of RNA-seq data, *Genome Biol.* 11 (2010) R25.  
872 doi:10.1186/gb-2010-11-3-r25.
- 873 [31] D.J. McCarthy, Y. Chen, G.K. Smyth, Differential expression analysis of

- 874 multifactor RNA-Seq experiments with respect to biological variation, *Nucleic*  
875 *Acids Res.* 40 (2012) 4288–4297. doi:10.1093/nar/gks042.
- 876 [32] Y. Benjamini, Y. Hochberg, Controlling the false discovery rate: a practical and  
877 powerful approach to multiple testing, *J. R. Stat. Soc. Ser. B.* 57 (1995) 289–300.  
878 doi:10.2307/2346101.
- 879 [33] A. Kozomara, M. Birgaoanu, S. Griffiths-Jones, MiRBase: From microRNA  
880 sequences to function, *Nucleic Acids Res.* 47 (2019) D155–D162.  
881 doi:10.1093/nar/gky1141.
- 882 [34] A. Marco, SeedVicious: Analysis of microRNA target and near-target sites, *PLoS*  
883 *One.* 13 (2018) e0195532. doi:10.1371/journal.pone.0195532.
- 884 [35] A. Grimson, K.K.H. Farh, W.K. Johnston, P. Garrett-Engele, L.P. Lim, D.P.  
885 Bartel, MicroRNA targeting specificity in mammals: determinants beyond seed  
886 pairing, *Mol. Cell.* 27 (2007) 91–105. doi:10.1016/j.molcel.2007.06.017.
- 887 [36] R.C. Friedman, K.K.H. Farh, C.B. Burge, D.P. Bartel, Most mammalian mRNAs  
888 are conserved targets of microRNAs, *Genome Res.* 19 (2009) 92–105.  
889 doi:10.1101/gr.082701.108.
- 890 [37] A. Reverter, E.K.F. Chan, Combining partial correlation and an information  
891 theory approach to the reversed engineering of gene co-expression networks,  
892 *Bioinformatics.* 24 (2008) 2491–2497. doi:10.1093/bioinformatics/btn482.
- 893 [38] N.S. Watson-Haigh, H.N. Kadarmideen, A. Reverter, PCIT: an R package for  
894 weighted gene co-expression networks based on partial correlation and  
895 information theory approaches, *Bioinformatics.* 26 (2010) 411–413.  
896 doi:10.1093/bioinformatics/btp674.
- 897 [39] M. Tarbier, S.D. Mackowiak, J. Frade, S. Catuara-Solarz, I. Biryukova, E. Gelali,  
898 D.B. Menéndez, L. Zapata, S. Ossowski, M. Bienko, C.J. Gallant, M.R.

- 899 Friedländer, Nuclear gene proximity and protein interactions shape transcript  
900 covariations in mammalian single cells, *Nat. Commun.* 11 (2020) 5445.  
901 doi:10.1038/s41467-020-19011-5.
- 902 [40] H.B. Mann, D.R. Whitney, On a test of whether one of two random variables is  
903 stochastically larger than the other, *Ann. Math. Stat.* 18 (1947) 50–60.  
904 doi:10.1214/aoms/1177730491.
- 905 [41] P.M. Sørensen, MicroRNA's in obesity and obesity related phenotypes: Using  
906 pig as a model, University of Copenhagen, 2014.
- 907 [42] A.B. Nygard, C.B. Jørgensen, S. Cirera, M. Fredholm, Selection of reference  
908 genes for gene expression studies in pig tissues using SYBR green qPCR, *BMC*  
909 *Mol. Biol.* 8 (2007) 67. doi:10.1186/1471-2199-8-67.
- 910 [43] C.M.J. Mentzel, F. Alkan, H. Keinicke, M.J. Jacobsen, J. Gorodkin, M.  
911 Fredholm, S. Cirera, Joint profiling of miRNAs and mRNAs reveals miRNA  
912 mediated gene regulation in the Göttingen minipig obesity model, *PLoS One.* 11  
913 (2016) e0167285. doi:10.1371/journal.pone.0167285.
- 914 [44] A. Untergasser, I. Cutcutache, T. Koressaar, J. Ye, B.C. Faircloth, M. Remm,  
915 S.G. Rozen, Primer3—new capabilities and interfaces, *Nucleic Acids Res.* 40  
916 (2012) e115–e115. doi:10.1093/nar/gks596.
- 917 [45] I. Balcells, S. Cirera, P.K. Busk, Specific and sensitive quantitative RT-PCR of  
918 miRNAs with DNA primers, *BMC Biotechnol.* 11 (2011) 70. doi:10.1186/1472-  
919 6750-11-70.
- 920 [46] S. Cirera, P.K. Busk, Quantification of miRNAs by a simple and specific qPCR  
921 method, in: *Methods Mol. Biol.* 1182 (2014) 73–81. doi:10.1007/978-1-4939-  
922 1062-5\_7.
- 923 [47] P.K. Busk, A tool for design of primers for microRNA-specific quantitative RT-

- 924 qPCR, *BMC Bioinformatics*. 15 (2014) 29. doi:10.1186/1471-2105-15-29.
- 925 [48] R. Denzler, S.E. McGeary, A.C. Title, V. Agarwal, D.P. Bartel, M. Stoffel,  
926 Impact of microRNA levels, target-site complementarity, and cooperativity on  
927 competing endogenous RNA-regulated gene expression, *Mol. Cell*. 64 (2016)  
928 565-579. doi:10.1016/j.molcel.2016.09.027.
- 929 [49] S.E. McGeary, K.S. Lin, C.Y. Shi, T.M. Pham, N. Bisaria, G.M. Kelley, D.P.  
930 Bartel, The biochemical basis of microRNA targeting efficacy, *Science*. 366  
931 (2019) eaav1741. doi:10.1126/science.aav1741.
- 932 [50] D.B. Mahat, H. Kwak, G.T. Booth, I.H. Jonkers, C.G. Danko, R.K. Patel, C.T.  
933 Waters, K. Munson, L.J. Core, J.T. Lis, Base-pair resolution genome-wide  
934 mapping of active RNA polymerases using precision nuclear run-on (PRO-seq),  
935 *Nat. Protoc.* 11 (2016) 1455. doi:10.1038/nprot.2016.086.
- 936 [51] A. Blumberg, Y. Zhao, Y.-F. Huang, N. Dukler, E.J. Rice, A.G. Chivu, K.  
937 Krumholz, C.G. Danko, A. Siepel, Characterizing RNA stability genome-wide  
938 through combined analysis of PRO-seq and RNA-seq data, *BMC Biol.* 19 (2021)  
939 30. doi:10.1186/s12915-021-00949-x.
- 940 [52] R.K. Patel, J.D. West, Y. Jiang, E.A. Fogarty, A. Grimson, Robust partitioning of  
941 microRNA targets from downstream regulatory changes, *Nucleic Acids Res.* 48  
942 (2020) 9724–9746. doi:10.1093/nar/gkaa687.
- 943 [53] X. Li, J. Shan, W. Chang, I. Kim, J. Bao, H.-J. Lee, X. Zhang, V.T. Samuel, G.I.  
944 Shulman, D. Liu, J.J. Zheng, D. Wu, Chemical and genetic evidence for the  
945 involvement of Wnt antagonist Dickkopf2 in regulation of glucose metabolism,  
946 *Proc. Natl. Acad. Sci.* 109 (2012) 11402–11407. doi:10.1073/PNAS.1205015109.
- 947 [54] J. Yang, B. Yin Shi, Dickkopf (Dkk)-2 is a beige fat-enriched adipokine to  
948 regulate adipogenesis, *Biochem. Biophys. Res. Commun.* 548 (2021) 211–216.

- 949           doi:10.1016/J.BBRC.2021.02.068.
- 950   [55] F. Deng, R. Zhou, C. Lin, S. Yang, H. Wang, W. Li, K. Zheng, W. Lin, X. Li, X.  
951       Yao, M. Pan, L. Zhao, Tumor-secreted dickkopf2 accelerates aerobic glycolysis  
952       and promotes angiogenesis in colorectal cancer, *Theranostics*. 9 (2019) 1001-  
953       1014. doi:10.7150/THNO.30056.
- 954   [56] J.Y. Jeong, N.H. Jeoung, K.-G. Park, I.-K. Lee, Transcriptional regulation of  
955       pyruvate dehydrogenase kinase, *Diabetes Metab. J.* 36 (2012) 328–35.  
956       doi:10.4093/dmj.2012.36.5.328.
- 957   [57] S. Zhang, M.W. Hulver, R.P. McMillan, M.A. Cline, E.R. Gilbert, The pivotal  
958       role of pyruvate dehydrogenase kinases in metabolic flexibility, *Nutr. Metab.* 11  
959       (2014) 10. doi:10.1186/1743-7075-11-10.
- 960   [58] B. Lindegaard, V.B. Mathews, C. Brandt, P. Hojman, T.L. Allen, E. Estevez,  
961       M.J. Watt, C.R. Bruce, O.H. Mortensen, S. Syberg, C. Rudnika, J. Abildgaard, H.  
962       Pilegaard, J. Hidalgo, S. Ditlevsen, T.J. Alsted, A.N. Madsen, B.K. Pedersen,  
963       M.A. Febbraio, Interleukin-18 activates skeletal muscle AMPK and reduces  
964       weight gain and insulin resistance in mice, *Diabetes*. 62 (2013) 3064–3074.  
965       doi:10.2337/DB12-1095.
- 966   [59] P. Jiang, L. Ren, L. Zhi, Z. Yu, F. Lv, F. Xu, W. Peng, X. Bai, K. Cheng, L,  
967       Quang, X. Zhang, X. Wang, Y. Zhang, D. Yang, X. Hu, R.P. Xiao, Negative  
968       regulation of AMPK signaling by high glucose via E3 ubiquitin ligase MG53,  
969       *Mol. Cell*. 81 (2021) 629-637.e5. doi:10.1016/J.MOLCEL.2020.12.008.
- 970   [60] C. Zhang, B. Zhang, X. Zhang, G. Sun, X. Sun, Targeting orphan nuclear  
971       receptors NR4As for energy homeostasis and diabetes, *Front. Pharmacol.* 11  
972       (2020) 587457. doi:10.3389/FPHAR.2020.587457.
- 973   [61] M.A. Pearen, J.M. Goode, R.L. Fitzsimmons, N.A. Eriksson, G.P. Thomas, G.J.

- 974 Cowin, S.C. Wang, Z.K. Tuong, G.E. Muscat, Transgenic muscle-specific Nor-1  
975 expression regulates multiple pathways that effect adiposity, metabolism, and  
976 endurance, *Mol. Endocrinol.* 27 (2013) 1897–1917. doi:10.1210/ME.2013-1205.
- 977 [62] S. Xu, H. Ni, H. Chen, Q. Dai, The interaction between STAT3 and nAChR $\alpha$ 1  
978 interferes with nicotine-induced atherosclerosis via Akt/mTOR signaling  
979 cascade, *Aging.* 11 (2019) 8120–8138. doi:10.18632/AGING.102296.
- 980 [63] L. Zhang, Z. Chen, Y. Wang, D.J. Tweardy, W.E. Mitch, Stat3 activation induces  
981 insulin resistance via a muscle-specific E3 ubiquitin ligase Fbxo40, *Am. J.*  
982 *Physiol. Endocrinol. Metab.* 318 (2020) E625–E635.  
983 doi:10.1152/AJPENDO.00480.2019.
- 984 [64] M.C. Monteiro, M. Sanyal, M.L. Cleary, C. Sengenès, A. Bouloumié, C. Dani, N.  
985 Billon, PBX1: a novel stage-specific regulator of adipocyte development, *Stem*  
986 *Cells.* 29 (2011) 1837–1848. doi:10.1002/STEM.737.
- 987 [65] D. Wu, D. Hu, H. Chen, G. Shi, I.S. Fetahu, F. Wu, K. Rabidou, R. Fang, L. Tan,  
988 S. Xu, H. Liu, C. Argueta, L. Zhang, F. Mao, G. Yan, J. Chen, Z. Dong, R. Lv,  
989 Y. Xu, M. Wang, Y. Ye, S. Zhang, D. Duquette, S. Geng, C. Yin, C.G. Lian, G.F.  
990 Murphy, G.K. Adler, R. Garg, L. Lynch, P. Yang, Y. Li, F. Lan, J. Fan, Y. Shi,  
991 Y.G. Shi, Glucose-regulated phosphorylation of TET2 by AMPK reveals a  
992 pathway linking diabetes to cancer, *Nature.* 559 (2018) 637–641.  
993 doi:10.1038/s41586-018-0350-5.
- 994 [66] T. Tamahara, K. Ochiai, A. Muto, Y. Kato, N. Sax, M. Matsumoto, T. Koseki, K.  
995 Igarashi, The mTOR-Bach2 cascade controls cell cycle and class switch  
996 recombination during B cell differentiation, *Mol. Cell. Biol.* 37 (2017) e00418-  
997 17. doi:10.1128/MCB.00418-17.
- 998 [67] G. Leprivier, B. Rotblat, How does mTOR sense glucose starvation? AMPK is



- 999 the usual suspect, *Cell Death Discov.* 6 (2020) 27. doi:10.1038/S41420-020-  
1000 0260-9.
- 1001 [68] A. Itoh-Nakadai, M. Matsumoto, H. Kato, J. Sasaki, Y. Uehara, Y. Sato, R.  
1002 Ebina-Shibuya, M. Morooka, R. Funayama, K. Nakayama, K. Ochiai, A. Muto,  
1003 K. Igarashi, A Bach2-Cebp gene regulatory network for the commitment of  
1004 multipotent hematopoietic progenitors, *Cell Rep.* 18 (2017) 2401–2414.  
1005 doi:10.1016/J.CELREP.2017.02.029.
- 1006 [69] K. Gopal, B. Saleme, R. Al Batran, H. Aburasayn, A. Eshreif, K.L. Ho, W.K.  
1007 Ma, M. Almutairi, F. Eaton, M. Gandhi, E.A. Park, G. Sutendra, J.R. Ussher,  
1008 FoxO1 regulates myocardial glucose oxidation rates via transcriptional control of  
1009 pyruvate dehydrogenase kinase 4 expression, *Am. J. Physiol. Circ. Physiol.* 313  
1010 (2017) H479–H490. doi:10.1152/ajpheart.00191.2017.
- 1011 [70] T. Glisovic, J.L. Bachorik, J. Yong, G. Dreyfuss, RNA-binding proteins and  
1012 post-transcriptional gene regulation, *FEBS Lett.* 582 (2008) 1977–1986.  
1013 doi:10.1016/J.FEBSLET.2008.03.004.
- 1014 [71] B.S. Zhao, I.A. Roundtree, C. He, Post-transcriptional gene regulation by mRNA  
1015 modifications, *Nat. Rev. Mol. Cell Biol.* 18 (2017) 31.  
1016 doi:10.1038/NRM.2016.132.
- 1017 [72] M.W. Hentze, A. Castello, T. Schwarzl, T. Preiss, A brave new world of RNA-  
1018 binding proteins, *Nat. Rev. Mol. Cell Biol.* 19 (2018) 327–341.  
1019 doi:10.1038/nrm.2017.130.
- 1020 [73] Q. Sun, Q. Hao, K. V. Prasanth, Nuclear long noncoding RNAs: key regulators  
1021 of gene expression, *Trends Genet.* 34 (2018) 142–157.  
1022 doi:10.1016/J.TIG.2017.11.005.
- 1023 [74] A. Velázquez-Cruz, B. Baños-Jaime, A. Díaz-Quintana, M.A.D. la Rosa, I. Díaz-

- 1024 Moreno, Post-translational control of RNA-binding proteins and disease-related  
1025 dysregulation, *Front. Mol. Biosci.* 8 (2021) 658852.  
1026 doi:10.3389/FMOLB.2021.658852.
- 1027 [75] M. Kubo, N. Ijichi, K. Ikeda, K. Horie-Inoue, S. Takeda, S. Inoue, Modulation of  
1028 adipogenesis-related gene expression by estrogen-related receptor  $\gamma$  during  
1029 adipocytic differentiation, *Biochim. Biophys. Acta - Gene Regul. Mech.* 1789  
1030 (2009) 71–77. doi:10.1016/J.BBAGRM.2008.08.012.
- 1031 [76] B. Xiao, S.M. Gu, M.J. Li, J. Li, B. Tao, Y. Wang, Y. Wang, S. Zuo, Y. Shen, Y.  
1032 Yu, D. Chen, G. Chen, D. Kong, J. Tang, Q. Liu, D.R. Cheng, Y. Liu, S. Alberti,  
1033 M. Dovizio, R. Landolfi, L. Mucci, P.-Z. Miao, P. Gao, D.-L. Zhu, J. Wang, B.  
1034 Li, P. Patrignani, Y. Yu, Rare SNP rs12731181 in the miR-590-3p target site of  
1035 the Prostaglandin F $2\alpha$  receptor gene confers risk for essential hypertension in the  
1036 Han Chinese population, *Arterioscler. Thromb. Vasc. Biol.* 35 (2015) 1687–  
1037 1695. doi:10.1161/ATVBAHA.115.305445.
- 1038 [77] Y. Wang, S. Yan, B. Xiao, S. Zuo, Q. Zhang, G. Chen, Y. Yu, D. Chen, Q. Liu,  
1039 Y. Liu, Y. Shen, Y. Yu, Prostaglandin F  $2\alpha$  facilitates hepatic glucose production  
1040 through CaMKII $\gamma$ /p38/FOXO1 signaling pathway in fasting and obesity,  
1041 *Diabetes.* 67 (2018) 1748–1760. doi:10.2337/DB17-1521.
- 1042 [78] P. Kaur, M.D. Reis, G.R. Couchman, S.N. Forjuoh, J.F. Greene, Jr, A. Asea,  
1043 SERPINE 1 links obesity and diabetes: a pilot study, *J. Proteomics Bioinform.* 3  
1044 (2010) 191. doi:10.4172/JPB.1000139.
- 1045 [79] G.M. Coudriet, J. Stoops, A.V. Orr, B. Bhushan, K. Koral, S. Lee, D.M. Previte,  
1046 H.H. Dong, G.K. Michalopoulos, W.M. Mars, J.D. Piganelli, A Noncanonical  
1047 role for plasminogen activator inhibitor type 1 in obesity-induced diabetes, *Am.*  
1048 *J. Pathol.* 189 (2019) 1413–1422. doi:10.1016/J.AJPATH.2019.04.004.

- 1049 [80] C.-S. Kuo, J.-S. Chen, L.-Y. Lin, G.W. Schmid-Schönbein, S. Chien, P.-H.  
1050 Huang, J.-W. Chen, S.-J. Lin, Inhibition of serine protease activity protects  
1051 against high fat diet-induced inflammation and insulin resistance, *Sci. Reports*.  
1052 10 (2020) 1–11. doi:10.1038/s41598-020-58361-4.
- 1053 [81] J. Kosacka, M. Nowicki, S. Paeschke, P. Baum, M. Blüher, N. Klöting, Up-  
1054 regulated autophagy: as a protective factor in adipose tissue of WOKW rats with  
1055 metabolic syndrome, *Diabetol. Metab. Syndr.* 10 (2018) 13. doi:10.1186/S13098-  
1056 018-0317-6.
- 1057 [82] J. Perttilä, K. Merikanto, J. Naukkarinen, I. Surakka, N.W. Martin, K.  
1058 Tanhuanpää, V. Grimard, M.-R. Taskinen, C. Thiele, V. Salomaa, A. Jula, M.  
1059 Perola, I. Virtanen, L. Peltonen, V.M. Oikonen, OSBPL10, a novel candidate  
1060 gene for high triglyceride trait in dyslipidemic Finnish subjects, regulates cellular  
1061 lipid metabolism, *J. Mol. Med.* 2009 878. 87 (2009) 825–835.  
1062 doi:10.1007/S00109-009-0490-Z.
- 1063 [83] R.F. Bowen, N.S. Raikwar, L.K. Olson, M.A. Deeg, Glucose and insulin regulate  
1064 glycosylphosphatidylinositol-specific phospholipase D expression in islet beta  
1065 cells, *Metabolism.* 50 (2001) 1489–1492. doi:10.1053/META.2001.28087.
- 1066 [84] S. Ussar, O. Bezy, M. Blüher, C.R. Kahn, Glypican-4 enhances insulin signaling  
1067 via interaction with the insulin receptor and serves as a novel adipokine,  
1068 *Diabetes.* 61 (2012) 2289–2298. doi:10.2337/DB11-1395.
- 1069 [85] W. Yang, T. Kelly, J. He, Genetic epidemiology of obesity, *Epidemiol. Rev.* 29  
1070 (2007) 49–61. doi:10.1093/epirev/mxm004.
- 1071 [86] Y. Zhou, L. Rui, Leptin signaling and leptin resistance, *Front. Med.* 7 (2013)  
1072 207–222. doi:10.1007/s11684-013-0263-5.
- 1073 [87] A.G. Izquierdo, A.B. Crujeiras, F.F. Casanueva, M.C. Carreira, Leptin, obesity,

1074 and leptin resistance: where are we 25 years later?, *Nutrients*. 11 (2019) 2704.

1075 doi:10.3390/NU11112704.

1076

1077

1078

1079

1080

1081

1082

1083

1084

1085

1086

1087

1088

1089

1090

1091

1092

1093

1094

1095

1096

1097

1098 **Table 1:** mRNA genes with the top 5% post-transcriptional signals (PTc) and reduced  
 1099 exonic fractions ( $\Delta Ex$ ) > 2 folds (equivalent to -1 in the  $\log_2$  scale) from *gluteus medius*  
 1100 skeletal muscle expression profiles of fasting (*AL-T0*, N = 11) and fed (*AL-T2*, N = 12)  
 1101 Duroc gilts.

| ID                 | Gene           | $\log_2FC$ | $\Delta Ex$ | PT <sub>c</sub> | P-value   | q-value   | DE | miRNA target |
|--------------------|----------------|------------|-------------|-----------------|-----------|-----------|----|--------------|
| ENSSSCG00000032094 | <i>DKK2</i>    | -2.010     | -1.431      | -4.738          | 1.654E-05 | 3.830E-03 | •  | x            |
| ENSSSCG00000015334 | <i>PDK4</i>    | -2.108     | -5.250      | -4.698          | 4.693E-03 | 1.330E-01 | x  | x            |
| ENSSSCG00000015037 | <i>IL18</i>    | -1.655     | -1.191      | -3.682          | 4.787E-03 | 1.340E-01 | •  | x            |
| ENSSSCG00000005385 | <i>NR4A3</i>   | -1.337     | -3.082      | -3.646          | 4.038E-02 | 4.098E-01 | x  | x            |
| ENSSSCG00000003766 | <i>DNAJB4</i>  | -1.391     | -1.008      | -3.348          | 8.358E-03 | 1.905E-01 |    | x            |
| ENSSSCG00000015969 | <i>CHRNA1</i>  | -1.561     | -1.339      | -3.341          | 2.606E-03 | 9.406E-02 | x  | x            |
| ENSSSCG00000039419 | <i>SLCO4A1</i> | -1.055     | -2.279      | -3.180          | 2.820E-02 | 3.544E-01 | x  | x            |
| ENSSSCG00000049158 |                | -1.107     | -1.096      | -3.164          | 3.182E-02 | 3.735E-01 |    | x            |
| ENSSSCG00000004347 | <i>FBXL4</i>   | -1.298     | -1.126      | -3.133          | 1.422E-03 | 6.520E-02 | x  | x            |
| ENSSSCG00000004979 | <i>MYO9A</i>   | -1.239     | -1.003      | -3.043          | 7.296E-03 | 1.731E-01 |    | x            |
| ENSSSCG00000013351 | <i>NAV2</i>    | -1.163     | -1.196      | -2.863          | 2.605E-04 | 2.301E-02 | x  | x            |
| ENSSSCG00000032741 | <i>TBC1D9</i>  | -0.913     | -1.061      | -2.736          | 1.534E-02 | 2.583E-01 | •  | x            |
| ENSSSCG00000031728 | <i>ABRA</i>    | -1.238     | -1.393      | -2.704          | 1.295E-03 | 6.116E-02 | x  | x            |
| ENSSSCG00000006331 | <i>PBX1</i>    | -0.891     | -1.039      | -2.480          | 1.135E-02 | 2.177E-01 | x  | x            |
| ENSSSCG00000035037 | <i>SIK1</i>    | -1.357     | -1.289      | -2.475          | 3.999E-03 | 1.212E-01 | x  | x            |
| ENSSSCG00000038374 | <i>CIART</i>   | -1.027     | -1.321      | -2.052          | 1.543E-02 | 2.587E-01 | x  |              |
| ENSSSCG00000023806 | <i>LRRN1</i>   | -0.776     | -1.013      | -1.983          | 1.580E-01 | 7.074E-01 |    | x            |
| ENSSSCG00000009157 | <i>TET2</i>    | -0.381     | -1.123      | -1.792          | 4.880E-01 | 9.582E-01 |    | x            |
| ENSSSCG00000011133 | <i>PFKFB3</i>  | -0.022     | -2.256      | -1.785          | 9.712E-01 | 9.987E-01 | x  | x            |
| ENSSSCG00000002283 | <i>FUT8</i>    | -0.578     | -1.286      | -1.784          | 9.887E-02 | 6.059E-01 | x  | x            |
| ENSSSCG00000023133 | <i>OSBPL6</i>  | -0.432     | -1.088      | -1.772          | 3.835E-01 | 9.108E-01 | x  |              |
| ENSSSCG00000017986 | <i>NDELI</i>   | -0.767     | -1.644      | -1.759          | 1.006E-02 | 2.081E-01 | x  | x            |
| ENSSSCG00000031321 | <i>NR4A1</i>   | -0.630     | -1.328      | -1.720          | 6.298E-02 | 5.006E-01 | x  |              |
| ENSSSCG00000035101 | <i>KLF5</i>    | -0.519     | -1.487      | -1.708          | 2.942E-01 | 8.488E-01 | x  | x            |
| ENSSSCG00000004332 | <i>BACH2</i>   | -0.714     | -2.105      | -1.705          | 9.089E-02 | 5.861E-01 | x  | x            |
| ENSSSCG00000017983 | <i>PER1</i>    | -0.773     | -1.073      | -1.627          | 3.000E-02 | 3.662E-01 | x  |              |

1102

1103 <sup>a</sup>Log<sub>2</sub>FC: estimated log<sub>2</sub> fold change for mean exonic fractions from *gluteus medius* expression profiles of fasted *AL-*  
 1104 *T0* and fed *AL-T2* Duroc gilts; <sup>b</sup> $\Delta Ex$ : exonic fraction increment ( $Ex_2 - Ex_1$ ) when comparing exon abundances in *AL-*  
 1105 *T0* ( $Ex_1$ ) vs *AL-T2* ( $Ex_2$ ) Duroc gilts; <sup>c</sup>PTc: post-transcriptional signal ( $\Delta Ex - \Delta Int$ ) in z-score scale; <sup>d</sup>q-value: q-value  
 1106 calculated with the false discovery rate (FDR) approach [32]. The “x” symbols represent differentially expressed  
 1107 (DE) genes ( $FC < -2$ ;  $q$ -value  $< 0.05$ ) according to their exonic fractions, as well as those targeted by at least one of  
 1108 the upregulated miRNAs excluding redundant seeds (N = 6, **Table S5**). The “•” symbol represents suggestive  
 1109 canonical differential expression ( $P$ -value  $< 0.01$ , **Table S4**).

1110

1111 **Table 2:** mRNA genes with the top 5% post-transcriptional signals (PTc) and reduced  
 1112 exonic fractions ( $\Delta\text{Ex}$ ) > 3 folds (equivalent to -1.58 in the  $\log_2$  scale) from adipocyte  
 1113 expression profiles of *lean* (N = 5) and *obese* (N = 5) Duroc-Göttingen minipigs  
 1114 according to their body mass index (BMI).

| mRNA               | Gene             | $\log_2\text{FC}^a$ | $\Delta\text{Ex}^b$ | PTc <sup>c</sup> | P-value   | q-value <sup>d</sup> | DE | miRNA target |
|--------------------|------------------|---------------------|---------------------|------------------|-----------|----------------------|----|--------------|
| ENSSSCG00000010814 | <i>ESRRG</i>     | -0.591              | -5.305              | -6.425           | 7.364E-01 | 9.996E-01            |    | x            |
| ENSSSCG00000032452 | <i>WFS1</i>      | -2.198              | -2.138              | -5.510           | 9.509E-03 | 9.996E-01            | x  |              |
| ENSSSCG00000039548 | <i>PTGFR</i>     | -1.634              | -1.590              | -4.915           | 8.804E-03 | 9.996E-01            | •  | x            |
| ENSSSCG00000002265 | <i>FAM174B</i>   | -1.244              | -1.726              | -4.179           | 5.385E-02 | 9.996E-01            | •  | x            |
| ENSSSCG00000016233 | <i>SERPINE2*</i> | -1.735              | -2.060              | -3.603           | 5.684E-02 | 9.996E-01            | x  | x            |
| ENSSSCG00000006243 | <i>PENK</i>      | -0.42               | -2.104              | -3.573           | 7.628E-01 | 9.996E-01            |    |              |
| ENSSSCG00000014921 | <i>PRSS23*</i>   | -1.141              | -1.739              | -3.360           | 2.719E-01 | 9.996E-01            | •  | x            |
| ENSSSCG00000017186 | <i>RNF157*</i>   | -1.218              | -2.338              | -3.317           | 2.413E-01 | 9.996E-01            | x  | x            |
| ENSSSCG00000031819 | <i>TP53III</i>   | -1.002              | -1.711              | -2.883           | 4.102E-01 | 9.996E-01            |    | x            |
| ENSSSCG00000001089 | <i>GPLDI</i>     | -0.872              | -1.761              | -2.723           | 4.302E-01 | 9.996E-01            |    | x            |
| ENSSSCG00000003377 | <i>ACOT7</i>     | -0.79               | -2.688              | -2.544           | 3.439E-01 | 9.996E-01            | x  |              |
| ENSSSCG00000040464 | <i>LEP*</i>      | -0.747              | -2.186              | -2.463           | 1.880E-01 | 9.996E-01            | x  | x            |
| ENSSSCG00000025652 | <i>CDH1</i>      | -0.472              | -2.592              | -2.372           | 6.533E-01 | 9.996E-01            | •  | x            |
| ENSSSCG00000011230 | <i>OSBPL10*</i>  | -0.576              | -1.594              | -1.869           | 4.272E-01 | 9.996E-01            | •  | x            |
| ENSSSCG00000017328 | <i>ARHGAP27</i>  | -0.235              | -2.788              | -1.699           | 8.113E-01 | 9.996E-01            | x  | x            |

1115

1116 <sup>a</sup> $\log_2\text{FC}$ : estimated  $\log_2$  fold change for mean exonic fractions from adipocyte expression profiles of *lean* and *obese*  
 1117 Duroc-Göttingen minipigs; <sup>b</sup> $\Delta\text{Ex}$ : exonic fraction increment ( $\text{Ex}_2 - \text{Ex}_1$ ) when comparing exon abundances in *obese*  
 1118 ( $\text{Ex}_1$ ) vs *lean* ( $\text{Ex}_2$ ) Duroc gilts; <sup>c</sup>PTc: post-transcriptional signal ( $\Delta\text{Ex} - \Delta\text{Int}$ ) in z-score scale; <sup>d</sup>q-value: q-value  
 1119 calculated with the false discovery rate (FDR) approach [32]. The “x” symbols represent differentially expressed  
 1120 (DE) genes ( $\text{FC} < -2$ ;  $q\text{-value} < 0.05$ ) according to their exonic fractions, as well as those targeted by at least one of  
 1121 the upregulated miRNAs excluding redundant seeds (N = 4, **Table S10**). The “•” symbol represents suggestive  
 1122 canonical differential expression ( $P\text{-value} < 0.01$ , **Table S9**).

1123

1124

1125

1126

1127

1128

1129

## 1130 **Figure legends**

1131 **Figure 1:** (A) Scatterplot depicting mRNA genes with the top 5% negative post-  
1132 transcriptional regulatory signals according to exonic ( $\Delta\text{Ex}$ ) and PTc ( $\Delta\text{Ex} - \Delta\text{Int}$ )  
1133 scores (in purple) and putatively targeted by upregulated ( $\text{FC} > 1.5$ ;  $q\text{-value} < 0.05$ )  
1134 miRNAs from *gluteus medius* skeletal muscle expression profiles of fasted (*AL-T0*,  $N =$   
1135 11) and fed (*AL-T2*,  $N = 12$ ) Duroc gilts. (B) Enrichment analyses of the number of  
1136 mRNA genes with the top 5% negative post-transcriptional signals (PTc) and reduced  
1137 exonic fractions ( $\Delta\text{Ex}$ )  $> 2$  folds putatively targeted by DE upregulated miRNAs ( $\text{FC} >$   
1138  $1.5$ ;  $q\text{-value} < 0.05$ ), DE downregulated miRNAs ( $\text{FC} < -1.5$ ;  $q\text{-value} < 0.05$ ) and the  
1139 top 5% most highly expressed miRNAs excluding DE upregulated miRNAs. (C)  
1140 Scatterplot depicting DE upregulated (in green) and downregulated (in red) mRNA  
1141 genes ( $|\text{FC}| > 2$ ;  $q\text{-value} < 0.05$ ) according to exonic ( $\Delta\text{Ex}$ ) and PTc ( $\Delta\text{Ex} - \Delta\text{Int}$ )  
1142 scores. (D) Enrichment analyses considering DE downregulated mRNA genes ( $\text{FC} < -2$ ;  
1143  $q\text{-value} < 0.05$ ) and excluding those with the top 5% putative post-transcriptional  
1144 regulatory signals previously analyzed. The black dashed line represents a  $P\text{-value} =$   
1145 0.05.

1146

1147 **Figure 2:** (A) Scatterplot depicting mRNA genes with the top 5% negative post-  
1148 transcriptional regulatory signals according to exonic ( $\Delta\text{Ex}$ ) and PTc ( $\Delta\text{Ex} - \Delta\text{Int}$ )  
1149 scores (in purple) and putatively targeted by upregulated ( $\text{FC} > 1.5$ ;  $P\text{-value} < 0.01$ )  
1150 miRNAs from adipocyte expression profiles of *lean* ( $N = 5$ ) and *obese* ( $N = 5$ ) Duroc-  
1151 Göttingen minipigs according to their body mass index (BMI). (B) Enrichment analyses  
1152 of the number of mRNA genes with the top 5% negative post-transcriptional signals  
1153 (PTc) and reduced exonic fractions ( $\Delta\text{Ex}$ )  $> 3$  folds (equivalent to 1.58 in the  $\log_2$  scale)  
1154 putatively targeted by DE upregulated miRNAs ( $\text{FC} > 1.5$ ;  $P\text{-value} < 0.01$ ), DE

1155 downregulated miRNAs ( $FC < -1.5$ ;  $P$ -value  $< 0.01$ ) and the top 5% most highly  
1156 expressed miRNAs excluding DE upregulated miRNAs. (C) Barplots depicting qPCR  
1157  $\log_2$  transformed relative quantities (Rq) for *LEP*, *OSBPL10*, *PRSS23*, *RNF157* and  
1158 *SERPINE2* mRNA transcripts measured in adipocytes from the retroperitoneal fat of  
1159 *lean* (N = 5) and *obese* (N = 5) Duroc-Göttingen minipigs. (D) Barplots depicting qPCR  
1160  $\log_2$  transformed relative quantities (Rq) for ssc-miR-148a-3p, ssc-miR-214-3p and ssc-  
1161 miR-92b-3p miRNA transcripts measured in the isolated adipocytes from the  
1162 retroperitoneal fat of *lean* (N = 5) and *obese* (N = 5) Duroc-Göttingen minipigs.

1163

1164 **Figure 3:** Covariation enrichment scores (CES) for the exonic and intronic fractions of  
1165 mRNA genes with post-transcriptional signals (PTc) and putatively targeted by  
1166 upregulated miRNAs from (A) *gluteus medius* skeletal muscle expression profiles of  
1167 fasted (*AL-T0*, N = 11) and fed (*AL-T2*, N = 12) Duroc gilts and (B) adipocyte  
1168 expression profiles of *lean* (N = 5) and *obese* (N = 5) Duroc-Göttingen minipigs  
1169 according to their body mass index (BMI). The top post-transcriptional signals were  
1170 defined as the 5% most negative PTc scores and reduced exonic fractions ( $\Delta Ex$ )  $> 2$   
1171 folds for *AL-T0* vs *ALT-2* Duroc gilts (N = 21) and ( $\Delta Ex$ )  $> 3$  folds for *lean* vs *obese*  
1172 Duroc-Göttingen minipigs (N = 12), respectively. The control set of CES values were  
1173 generated by permuted (N = 1,000) random sets of exonic and intronic profiles of genes  
1174 with same length as those with post-transcriptional signals in both contrasts (N = 21 for  
1175 *AL-T0* vs *ALT-2* and N = 12 for *lean* vs *obese*). Significant differences were assessed  
1176 using a Mann-Whitney U non-parametric test [40].

1177

1178

1179



## 1180 **Supplementary Tables**

1181 **Table S1:** Phenotype values for selected Duroc-Göttingen minipigs from the F2-UNIK  
1182 source population according to their body mass indexes (BMI).

1183

1184 **Table S2:** Primers for qPCR validation of selected mRNA and miRNA genes according  
1185 to EISA results in the F2-UNIK Duroc-Göttingen minipig population comparing *lean*  
1186 (N = 5) and *obese* (N = 5) individuals.

1187

1188 **Table S3:** Raw Cq values after efficiency correction measuring adipocyte expression  
1189 profiles of selected mRNAs and miRNAs from *lean* (N = 5) and *obese* (N = 5) Duroc-  
1190 Göttingen minipigs.

1191

1192 **Table S4:** Genes detected by *edgeR* tool as differentially expressed when comparing  
1193 *gluteus medius* expression profiles of fasted *AL-T0* (N = 11) and fed *AL-T2* (N = 12)  
1194 Duroc gilts.

1195

1196 **Table S5:** microRNA genes detected by *edgeR* tool as differentially expressed when  
1197 comparing *gluteus medius* expression profiles of fasted *AL-T0* (N = 11) and fed *AL-T2*  
1198 (N = 12) Duroc gilts.

1199

1200 **Table S6:** EISA analyses for post-transcriptional signals detected in *gluteus medius*  
1201 skeletal muscle expression profiles of fasted (*AL-T0*, N = 11) and fed (*AL-T2*, N = 12)  
1202 Duroc gilts.

1203

1204 **Table S7:** Binding sites for differentially upregulated miRNAs from mRNA genes with  
1205 the top 5% negative PTc scores and reduced  $\Delta\text{Ex} > 2$  folds from *gluteus medius* skeletal  
1206 muscle expression profiles of fasting (*AL-T0*, N = 11) and fed (*AL-T2*, N = 12) Duroc  
1207 gilts.

1208

1209 **Table S8:** Binding sites for differentially upregulated miRNAs from the 5'-UTR of the  
1210 two transcripts annotated for the ENSSSCG00000049158 mRNA gene.

1211

1212 **Table S9:** Genes detected by *edgeR* tool as differentially expressed when comparing  
1213 adipocyte expression profiles from *lean* (N = 5) and *obese* (N = 5) Duroc-Göttingen  
1214 minipigs according to their body mass index (BMI).

1215

1216 **Table S10:** microRNA genes detected by *edgeR* tool as differentially expressed when  
1217 comparing adipocyte expression profiles from *lean* (N = 5) and *obese* (N = 5) Duroc-  
1218 Göttingen minipigs according to their body mass index (BMI).

1219

1220 **Table S11:** Genes with the top 5% post-transcriptional signals (PTc) and reduced  
1221 exonic fractions ( $\Delta\text{Ex} > 3$  folds (equivalent to -1.58 in the  $\log_2$  scale) from adipocyte  
1222 expression profiles of *lean* (N = 5) and *obese* (N = 5) Duroc-Göttingen minipigs  
1223 according to their body mass index (BMI).

1224

1225 **Table S12:** Binding sites for differentially upregulated miRNAs from mRNA genes  
1226 with top 5% negative PTc scores and reduced  $\Delta\text{Ex} > 3$  folds from adipocyte expression  
1227 profiles of *lean* (N = 5) and *obese* (N = 5) Duroc-Göttingen minipigs according to their  
1228 body mass index (BMI).

1229

1230 **Table S13:** Covariation enrichment scores (CES) for the exonic and intronic fractions  
1231 of mRNA genes with the top 5% post-transcriptional signals (PTc) that were putatively  
1232 targeted by DE upregulated miRNAs from *gluteus medius* skeletal muscle expression  
1233 profiles *AL-T0* vs *AL-T2* Duroc gilts (N = 21), as well as from adipocyte expression  
1234 profiles of *lean* vs *obese* Duroc-Göttingen minipigs (N = 12).

1235

1236

### 1237 **Supplementary Figures**

1238 **Figure S1:** (A) Scatterplot depicting post-transcriptional regulatory signals according to  
1239 differences in the exonic fraction ( $\Delta\text{Ex}$ ) and PTc ( $\Delta\text{Ex} - \Delta\text{Int}$ ) scores. (B) The  
1240 classification and interpretation of post-transcriptional signals according to  $\Delta\text{Ex}$ ,  $\Delta\text{Int}$   
1241 (Tc) and  $\Delta\text{Ex} - \Delta\text{Int}$  (PTc) values. (C) Diagram depicting the consecutive steps  
1242 implemented for studying miRNA-driven post-transcriptional regulatory signals  
1243 applying the EISA approach and additional enrichment and covariation analyses.

1244

1245 **Figure S2:** Scatterplots depicting the exonic ( $\Delta\text{Ex}$ ) and intronic ( $\Delta\text{Int}$ ) fractions from  
1246 *gluteus medius* skeletal muscle expression profiles of fasting (*AL-T0*, N = 11) and fed  
1247 (*AL-T2*, N = 12) Duroc gilts. (A) mRNA genes with the top 5% post-transcriptional  
1248 (PTc) negative scores and reduced exonic ( $\Delta\text{Ex}$ ) fractions > 2 folds (equivalent to -1 in  
1249 the  $\log_2$  scale), suggestive of miRNA-driven post-transcriptional regulation. (B) mRNA  
1250 genes differentially expressed showing upregulation (FC > 2;  $q$ -value < 0.05, in green)  
1251 and downregulation (FC < -2,  $q$ -value < 0.05, in red) in fed (*AL-T2*, N = 12) Duroc gilts  
1252 with respect to their fasted (*AL-T0*, N = 11) counterparts.

1253

1254 **Figure S3:** Enrichment analyses of the number of genes with the **(A)** top 1% and **(B)**  
1255 top 5% negative post-transcriptional signals (PTc) and reduced exonic fractions ( $\Delta\text{Ex}$ ) >  
1256 2 folds putatively targeted by upregulated miRNAs ( $\text{FC} > 1.5$ ;  $q\text{-value} < 0.05$ ) from  
1257 *gluteus medius* skeletal muscle expression profiles of fasting (*AL-T0*,  $N = 11$ ) and fed  
1258 (*AL-T2*,  $N = 12$ ) Duroc gilts and the consequences of incorporating context-based  
1259 pruning of miRNA binding sites of type 8mer, 7mer-m8 and 7mer-A1. R: Raw  
1260 enrichment analyses without any additional context-based pruning. AU: Enrichment  
1261 analyses removing miRNA binding sites without AU-rich flanking sequences (30 nts  
1262 upstream and downstream). M: Enrichment analyses removing miRNA binding sites  
1263 located in the middle of the 3'-UTR sequence (45-55%). E: Enrichment analyses  
1264 removing miRNA binding sites located too close ( $< 15$  nts) to the beginning or the end  
1265 of the 3'-UTR sequences. The black dashed line represents a  $P\text{-value} = 0.05$ .  
1266

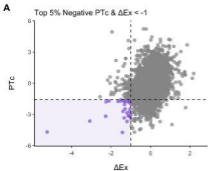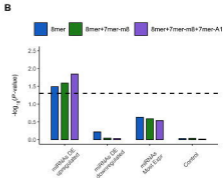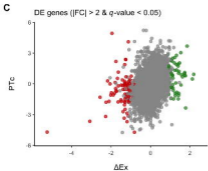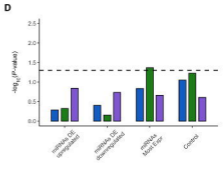

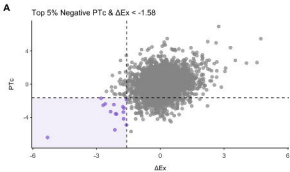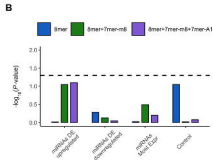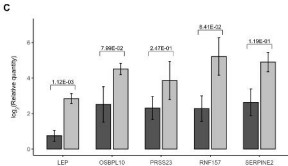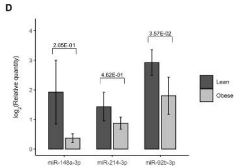

**A**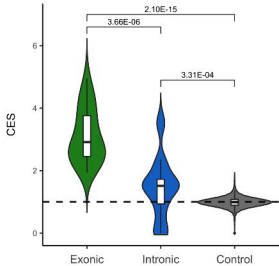**B**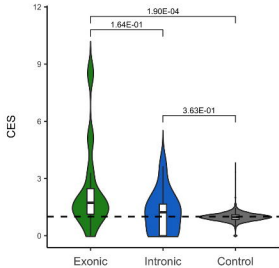

Source: https://www.biorxiv.org/content/biorxiv/early/2021/08/15/2021.07.14.452370.full.pdf
