1 **Modeling miRNA-driven post-transcriptional regulation by**  
2 **using exon-intron split analysis (EISA) in pigs**

3

4 Emilio Mármol-Sánchez<sup>1\*</sup>, Susanna Cirera<sup>2</sup>, Laura M. Zingaretti<sup>3</sup>, Mette Juul Jacobsen<sup>2</sup>,  
5 Yuliaxis Ramayo-Caldas<sup>4</sup>, Claus B. Jørgensen<sup>2</sup>, Merete Fredholm<sup>2</sup>, Tainã Figueiredo  
6 Cardoso<sup>1†</sup>, Raquel Quintanilla<sup>4</sup>, Marcel Amills<sup>1,5</sup>

7

8 <sup>1</sup>Centre for Research in Agricultural Genomics (CRAG), CSIC-IRTA-UAB-UB,  
9 Universitat Autònoma de Barcelona, 08193 Bellaterra, Spain.

10 <sup>2</sup>Department of Veterinary and Animal Sciences, Faculty of Health and Medical Sciences,  
11 University of Copenhagen, 1871 Frederiksberg C, Denmark.

12 <sup>3</sup>Universidad Nacional de Villa María, Villa María, Córdoba, Argentina.

13 <sup>4</sup>Animal Breeding and Genetics Program, Institute for Research and Technology in Food  
14 and Agriculture (IRTA), Torre Marimon, 08140 Caldes de Montbui, Barcelona, Spain.

15 <sup>5</sup>Departament de Ciència Animal i dels Aliments, Universitat Autònoma de Barcelona,  
16 08193 Bellaterra, Barcelona, Spain.

17

18 \*Emilio Mármol-Sánchez current address: Stockholm University, The Wenner-Gren  
19 Institute, Department of Molecular Biosciences, SciLifelab.

20 †Tainã Figueiredo Cardoso current address: Embrapa Pecuária Sudeste, Empresa  
21 Brasileira de Pesquisa Agropecuária (EMBRAPA), 13560-970, São Carlos, SP, Brazil.

22

23 **Corresponding author:** Emilio Mármol-Sánchez. Stockholm University, The Wenner-  
24 Gren Institute, Department of Molecular Biosciences, SciLifelab. Email:  
25 [emilio.marmol.sanchez@gmail.com](mailto:emilio.marmol.sanchez@gmail.com)

## 26 **Abstract**

27 Bulk sequencing of RNA transcripts has typically been used to quantify gene expression  
28 levels in different experimental systems. However, linking differentially expressed (DE)  
29 mRNA transcripts to gene expression regulators, such as miRNAs, remains challenging,  
30 as miRNA-mRNA interactions are commonly identified *post hoc* after selecting sets of  
31 genes of interest, thus biasing the interpretation of underlying gene regulatory networks.  
32 In this study, we aimed at disentangling miRNA-driven post-transcriptional signals linked  
33 to porcine muscle and adipose tissue energy homeostasis. For this purpose, we performed  
34 an exon-intron split analysis (EISA) on muscle and fat RNA-seq data from two  
35 independent pig populations. One of these populations was subjected to fasting-feeding  
36 conditions, while the other represented divergent fatness profiles. After running EISA,  
37 protein-coding mRNA genes with downregulated exonic fractions and high post-  
38 transcriptional signals were significantly enriched for binding sites of DE upregulated  
39 miRNAs. Moreover, these downregulated genes showed an increased expression  
40 covariation for the exonic fraction compared to the intronic fraction. On the contrary, they  
41 did not show enrichment for binding sites of non-DE highly expressed or downregulated  
42 DE miRNAs. Among the set of loci displaying miRNA-driven post-transcriptional  
43 regulatory signals, we observed genes related to glucose homeostasis (*DKK2*, *PDK4*,  
44 *IL18*, *NR4A3*, *CHRNA1*, *TET2*), cell differentiation (*PBX1*, *BACH2*) and adipocytes  
45 metabolism (*SESN3*, *ESRRG*, *SAMD4*, *LEP*, *PTGFR*, *SERPINE2*, *RNF157*, *GPLD1*,  
46 *NCF2*, *OSBPL10*, *PRSS23*). Our results highlighted mRNA genes showing post-  
47 transcriptional miRNA-driven downregulation using the exonic and intronic fractions of  
48 RNA-seq datasets from muscle and adipose tissues in pigs.

49 **Keywords:** Exon-intron split analysis, microRNA, pigs, energy homeostasis.

50

## 51 **1. Introduction**

52 Messenger RNA (mRNA) expression and turnover in metabolic processes are subjected  
53 to complex yet poorly characterized regulatory mechanisms that contribute to shaping  
54 fine-tuned biological responses to different stimuli [1]. Cellular metabolic changes are  
55 hence a direct manifestation of intricate interactions between expressed transcripts and  
56 other regulatory elements that modify their abundance, localization, fate and degradation  
57 rate. MicroRNAs (miRNAs) are primarily engaged in the post-transcriptional control of  
58 gene expression through inhibition of translation and/or destabilization of target mRNAs  
59 by poly(A) shortening and subsequent degradation [2].

60 Changes in the abundance of mRNAs targeted by miRNAs can be inferred through  
61 covariation analysis. Such approach can help to unravel direct or indirect molecular  
62 interactions connecting and regulating biological networks.

63 In order to disentangle regulatory functions driven by miRNAs, research studies typically  
64 focus on specific sets of genes of interest, showing significant expression changes and  
65 harboring binding sites for DE miRNAs [3–9]. This approach, however, is biased by the  
66 fact that genes are selected after differential expression analysis and by the performance  
67 of an *ad hoc* search of predicted interactions between the 3'-UTRs of mRNAs and the  
68 seed regions of miRNAs. Besides, one of the main limitations of differential expression  
69 analysis is that it does not discriminate whether changes in expression take place either at  
70 the transcriptional or post-transcriptional levels. Such distinction is essential to  
71 understand at which level of the mRNA life-cycle the regulation is taking place.

72 To address this issue, Gaidatzis *et al.* [10] proposed that the magnitude of the post-  
73 transcriptional component can be deduced by comparing the amounts of exonic and  
74 intronic reads. Based on this, these authors devised a methodology denoted *exon-intron*  
75 *split analysis* (EISA), which separates the transcriptional and post-transcriptional

76 components of gene regulation. By considering that intronic reads are mainly derived  
77 from heterogeneous nuclear RNAs (unprocessed mRNAs or pre-mRNAs), they assessed  
78 the magnitude of the transcriptional regulation. Such assumption is based on early reports  
79 describing intronic expression as a proxy of nascent transcription and co-transcriptional  
80 splicing events [11–13]. In this way, a gene showing similar levels of intronic reads in  
81 two different states but a strong downregulation of exonic reads after applying a certain  
82 treatment or challenge (nutrition, infection, temperature etc.), could be indicative of an  
83 induced inhibition at the post-transcriptional level [10,14,15].

84 A high number of differential expression studies have been performed in pigs during the  
85 last decade [16–24], but to the best of our knowledge, in none of these studies the  
86 transcriptional and post-transcriptional components of gene regulation have been  
87 independently analyzed. In the present study, we aimed to dissect the contribution of  
88 miRNAs to post-transcriptional regulation in pigs by applying the EISA methodology  
89 using two independent porcine experimental models.

90

91

## 92 **2. Materials and methods**

### 93 **2.1. Experimental design, sampling and processing**

94 In this study, we have used two independent experimental systems:

- 95 (i) Duroc pigs: Twenty-three gilts divided in two fasting/feeding regimes, i.e., 11 gilts  
96 (*AL-T0*) slaughtered in fasting conditions and 12 gilts (*AL-T2*) slaughtered immediately  
97 after 7 h with access to *ad libitum* feed intake [7,22,25]. Immediately after slaughtering,  
98 *gluteus medius* (GM) skeletal muscle samples were collected and snap-frozen at -80°C.  
99 (ii) Duroc-Göttingen minipig F<sub>2</sub> inter-cross: Ten individuals with divergent fatness  
100 profiles for their body mass index (BMI) metric (5 *lean* and 5 *obese*) were selected from

101 the UNIK resource population [26,27], as described in Jacobsen et al. 2019 [28].  
102 Retroperitoneal adipose tissue was collected at slaughter and mature adipocytes were  
103 subsequently isolated following the protocol of Decaunes et al. 2011 [29] with  
104 modifications reported in [28].

105 Further details about RNA-seq and small RNA-seq expression data generated from both  
106 experimental designs have been previously described [7,22,28]. Sequencing reads  
107 generated in the RNA-Seq and small RNA-Seq datasets from both pig resources were  
108 trimmed with the Cutadapt software [30]. Reads were mapped against the Sscrofa11.1  
109 porcine assembly [31] with the HISAT2 aligner [32] and default parameters for RNA-  
110 Seq reads. In contrast, the Bowtie Alignment v.1.2.1.1 software [33] with small sequence  
111 reads specifications (*bowtie -n 0 -l 25 -m 20 -k 1 --best --strata*) was used to align small  
112 RNA-Seq reads to the Sscrofa11.1 porcine reference assembly [31].

113

## 114 **2.2. Exon/Intron quantification**

115 We generated exonic and intronic-specific annotations spanning all genes available using  
116 the gtf formatted Sscrofa.11.1 v.103 gene annotation file (Ensembl repositories:  
117 [http://ftp.ensembl.org/pub/release-103/gtf/sus\\_scrofa/](http://ftp.ensembl.org/pub/release-103/gtf/sus_scrofa/)). Overlapping intronic/exonic  
118 regions, as well as singleton positions were removed [34]. Each intronic region was  
119 trimmed by removing 10 nucleotides on both ends to avoid exonic reads mapping close  
120 to exon/intron junctions. We then used the featureCounts function included in the  
121 Rsubread package [35] to quantify gene expression profiles based on exonic and intron  
122 expression patterns for each gene, independently. MiRNA expression profiles were  
123 estimated using the Sscrofa11.1 v.103 mature miRNA annotation with the featureCounts  
124 software tool [36] in single-end mode and with default parameters.

125

### 126 **2.3. Exon/intron split analysis (EISA).**

127 We applied EISA to infer post-transcriptional gene regulation in our two independent  
128 porcine datasets. For this purpose, we separately estimated the exonic and intronic  
129 abundance of each annotated mRNA gene using the Sscrofa11.1 v.103 exon/intron  
130 custom annotation generated as described above. Only genes showing average expression  
131 values above 1 count-per-million in at least 50% of animals were retained for further  
132 analyses. Normalization was performed independently for exon and intron counts by  
133 multiplying each  $i^{th}$  gene expression in each  $j^{th}$  sample by the corresponding mean gene  
134 expression and dividing by the total number of quantified counts per sample [10]. Exonic  
135 and intronic gene abundances were subsequently transformed to a  $\log_2$  scale, adding a  
136 pseudo-count of 1 and averaged within each considered treatment groups (*AL-T0* and *AL-*  
137 *T2* for GM tissues and *lean* and *obese* for adipocyte isolates).

138 Only genes with successful exonic and intronic quantified read counts were considered  
139 in our analyses. The transcriptional component (Tc) contribution to the observed  
140 differences in each  $i^{th}$  gene was expressed as the increment of intronic counts in fed (*AL-*  
141 *T2*) and *obese* animals with respect to fasting (*AL-T0*) and *lean* animals ( $\Delta\text{Int} = \text{Int}_{2i} -$   
142  $\text{Int}_{1i}$ ), respectively. The increment of exonic counts ( $\Delta\text{Ex}$ ) was also calculated, and the  
143 post-transcriptional component (PTc) effect was expressed as  $\Delta\text{Ex} - \Delta\text{Int} = (\text{Ex}_{2i} - \text{Ex}_{1i})$   
144  $- (\text{Int}_{2i} - \text{Int}_{1i})$ . Both components were z-scored to represent comparable ranges between  
145  $\Delta\text{Ex}$  and  $\Delta\text{Int}$  estimates. All implemented analyses have been summarized in **Fig. S1**. A  
146 ready-to-use modular pipeline for running EISA is publicly available at  
147 <https://github.com/emarmolsanchez/EISACompR>

148

### 149 **2.4. Post-transcriptional signal prioritization**

150 In order to obtain a prioritized list of genes showing relevant signals of post-  
151 transcriptional regulation, the top 5% genes with the highest negative PTc scores were  
152 retrieved. We only focused on genes showing strongly reduced exonic fraction ( $\Delta Ex$ )  
153 values of at least 2-folds for post-transcriptional signals in both experimental systems.

154

## 155 **2.5. Differential expression analyses and significance of PTc scores**

156 Differential expression analyses were carried out with the *edgeR* package [37] by  
157 considering the exonic fraction of mRNAs, as well as miRNA expression profiles from  
158 RNA-Seq and small RNA-Seq datasets, respectively, and in the two experimental systems  
159 under study. Expression filtered raw counts for exonic reads were normalized with the  
160 trimmed mean of M-values normalization (TMM) method [38] and the statistical  
161 significance of mean expression differences was tested with a quasi-likelihood F-test [37].  
162 Correction for multiple hypothesis testing was implemented with the Benjamini-  
163 Hochberg false discovery rate approach [39]. Messenger RNAs were considered as  
164 differentially expressed (DE) when the absolute value of the fold-change (FC) was higher  
165 than 2 ( $|FC| > 2$ ) and  $q$ -value  $< 0.05$ . For miRNAs,  $|FC| > 1.5$  and  $q$ -value  $< 0.05$  were  
166 used instead. This more flexible threshold was motivated by the fact that miRNAs are  
167 commonly lowly expressed and show more stable and subtle expression changes  
168 compared to mRNAs [7,40]. The statistical significance of the post-transcriptional (PTc)  
169 scores was evaluated by incorporating the intronic quantification as an interaction effect  
170 for exonic abundances [10]. The fasting pigs (*AL-T0*) from Duroc skeletal muscle, as well  
171 as *obese* pigs from Duroc-Göttingen adipocyte expression profiles were considered to be  
172 the baseline controls, i.e., any given upregulation in  $\Delta Ex$  or  $\Delta Int$  values represents and  
173 overexpression in fed (*AL-T2*) Duroc gilts and *lean* Duroc-Göttingen minipigs with  
174 respect to their fasting (*AL-T0*) and *obese* counterparts.

175

## 176 **2.6. miRNA target prediction**

177 Putative interactions between the seed regions of expressed miRNAs (small RNA-seq  
178 datasets) and the 3'-UTRs of expressed protein-coding mRNA genes (RNA-seq datasets)  
179 were predicted on the basis of sequence identity using the Sscrofa11.1 reference  
180 assembly. The annotated 3'-UTRs longer than 30 nts from porcine mRNAs were retrieved  
181 from the Sscrofa11.1 v.103 available at BioMart (<http://www.ensembl.org/biomart>) and  
182 miRBase [41] databases. Redundant seeds from mature porcine microRNAs were  
183 removed. The seedVicious v1.1 tool [42] was used to infer miRNA-mRNA interactions.  
184 MiRNA-mRNA 8mer, 7mer-m8 and 7mer-A1 interactions were considered as the most  
185 relevant among the full set of canonical and non-canonical interactions [2,43,44].

186 Based on the study of Grimson et al. [43], the *in silico*-predicted miRNA-mRNA  
187 interactions matching any of the following criteria were removed: (i) Binding sites located  
188 in 3'-UTRs at less than 15 nts close to the end of the open reading frame (and the stop  
189 codon) or less than 15 nts close to the terminal poly(A) tail (E criterion), (ii) binding sites  
190 located in the middle of the 3'-UTR in a range comprising 45-55% of the central region  
191 of the non-coding sequence (M criterion), and (iii) binding sites lack AU-rich elements  
192 in their immediate upstream and downstream flanking regions comprising 30 nts each  
193 (AU criterion).

194 Covariation patterns between miRNAs and their predicted mRNA targets were assessed  
195 by computing Spearman's correlation coefficients ( $\rho$ ) with the TMM normalized and  $\log_2$   
196 transformed expression profiles of the exonic fractions of mRNA and miRNA genes. To  
197 determine the contribution of miRNAs to post-transcriptional regulation in the two  
198 experimental systems under study, only miRNA-mRNA predicted pairs comprising DE  
199 upregulated miRNAs ( $FC > 1.5$ ;  $q$ -value  $< 0.05$ ) and mRNA genes with relevant PTC



200 scores (see post-transcriptional signal prioritization section) were taken into  
201 consideration.

202

## 203 **2.7. miRNA target enrichment analyses**

204 We sought to determine if the overall number of mRNA genes with high post-  
205 transcriptional signals (the ones with the top 5% negative PTc scores and reduced  $\Delta$ Ex  
206 values  $> 2$ -folds) were significantly enriched to be targeted by at least one upregulated  
207 miRNA (FC  $> 1.5$ ;  $q$ -value  $< 0.05$ ), compared with the whole set of expressed mRNAs  
208 genes with available 3'-UTRs from both datasets. Enrichment analyses were carried out  
209 using the Fisher's exact test implemented in the *fisher.test* R function. Significance level  
210 was set at nominal  $P$ -value  $< 0.05$ .

211 We also tested whether these genes were enriched for binding sites of the top 5% most  
212 highly expressed miRNA genes, excluding significantly upregulated miRNAs, as well as  
213 for binding sites of significantly downregulated miRNAs (FC  $< -1.5$ ;  $q$ -value  $< 0.05$ ).  
214 Given the relatively low statistical significance of DE miRNAs observed in the UNIK  
215 Duroc-Göttingen minipigs (*lean* vs *obese*), we considered that miRNAs were  
216 significantly upregulated in this particular data set when FC  $> 1.5$  and  $P$ -value  $< 0.01$ .

217 As a control randomized test for enrichment analyses between miRNAs and mRNAs with  
218 high post-transcriptional downregulatory signals, we implemented a bootstrap corrected  
219 iteration to generate 100 random sets of 10 expressed mature miRNA genes without seed  
220 redundancy, which were used as input for miRNA target prediction with the sets of  
221 mRNA genes with the high post-transcriptional signals (top 5% PTc scores and at least  
222 2-folds  $\Delta$ Ex reduction). The distribution of odds ratios obtained after iterating over each  
223 random set of miRNAs (N = 100) were then compared with odds ratios obtained with the  
224 set of significantly upregulated miRNAs.

225 The  $P$ -value for the significance of the deviation of observed odds ratios against the  
226 bootstrapped odds ratios distribution was defined as,  $P - value = 1 - \frac{r+1}{k+1}$ , where  $r$   
227 is the number of permuted odds ratios with values equal or higher than the observed odds  
228 ratio for enrichment analyses with the set of upregulated miRNAs, and  $k$  is the number  
229 of defined permutations ( $N = 100$ ).

230

## 231 **2.8. Gene covariation network and covariation enrichment score**

232 We computed pairwise correlation coefficients among the whole set of DE mRNA genes  
233 in the *AL-T0* vs *AL-T2* ( $q$ -value  $< 0.05$ ,  $N = 454$ ) and *lean* vs *obese* ( $q$ -value  $< 0.05$ ,  $N =$   
234  $299$ ). These correlations were compared with those corresponding to the set of genes with  
235 relevant post-transcriptional signals and putatively targeted by DE upregulated miRNAs.  
236 Normalized exonic and intronic estimates in the  $\log_2$  scale obtained from EISA analyses  
237 were used to compute Spearman's correlation coefficients ( $\rho$ ) for each potential pair of  
238 DE mRNA genes plus those with post-transcriptional signals but without significant DE.  
239 Self-correlation pairs were excluded. Significant correlations were identified with the  
240 Partial Correlation with Information Theory (PCIT) network inference algorithm [45]  
241 implemented in the *pcit* R package [46]. Non-significant covarying pairs were set to zero,  
242 while a value of 1 was assigned to the significant ones with both positive or negative  
243 coefficients  $|\rho| > 0.6$ .

244 The potential contribution of miRNAs to shape the observed covariation patterns was  
245 assessed by calculating a covariation enrichment score (CES) following Tarbier et al.  
246 2020 [47]. If multiple genes are downregulated by any upregulated miRNAs in a  
247 coordinated manner, we would expect to observe a reduced abundance in their mature  
248 spliced mRNA forms but not in the corresponding primary transcripts, i.e., we would  
249 detect a covariation only for the exonic fractions (but not for the intronic ones). In other

250 words, the intronic fraction, eventually spliced and degraded in the nucleus, should not  
251 reflect any posterior post-transcriptional regulatory effects in the cytoplasm, so little or  
252 null covariation might be expected. Significant differences among the set of exonic,  
253 intronic and control CES values were tested with a non-parametric approach using a  
254 Mann-Whitney U non-parametric test [48]. Further details can be found in  
255 **Supplementary Methods**.

256

## 257 **2.9. Estimating the expression levels of miRNAs and several of their predicted** 258 **mRNA targets by qPCR**

259 The same total RNA extracted from adipocytes and used for sequencing was subsequently  
260 employed for cDNA synthesis and qPCR verification. Five mRNAs (*LEP*, *OSBLP10*,  
261 *PRSS23*, *RNF157* and *SERPINE2*) among the top 5% negative PTC scores and showing  
262 at least 2-folds reduction in their  $\Delta Ex$  values were selected for qPCR profiling. Two  
263 reference genes (*TBP* and *ACTB*, as defined by Nygard et al. 2007 [49]) were used for  
264 normalization. Accordingly, three of the most DE miRNAs were selected for qPCR  
265 profiling (ssc-miR-92b-3p, ssc-miR-148a-3p and ssc-miR-214-3p), plus two highly  
266 expressed non-DE miRNAs for normalization (ssc-let-7a and ssc-miR-23a-3p) from the  
267 *lean vs obese* small RNA-Seq dataset. Further details about qPCR experimental  
268 procedures are available in **Supplementary Methods**. All primers for mRNA and  
269 miRNA expression profiling are available at **Table S2**. Raw Cq values for each assay are  
270 available at **Table S3**.

271

272

## 273 **3. Results**

274 **3.1. The analysis of post-transcriptional regulation in muscle samples from fasting**  
275 **and fed Duroc gilts**

276 *Identification of genes predicted to be post-transcriptionally regulated by miRNAs*

277 After the processing, mapping and quantification of mRNA and miRNA expression levels  
278 in GM skeletal muscle samples from Duroc gilts, an average of 45.2 million reads per  
279 sample (~93%) were successfully mapped to 31,908 genes annotated in the Sscrofa11.1  
280 v.103 assembly (including protein coding and non-coding genes). Besides, an average of  
281 2.2 million reads per sample (~42%) mapped to 370 annotated porcine miRNA genes.  
282 A total of 30,322 (based on exonic reads) and 22,769 (based on intronic reads) genes were  
283 successfully quantified after splitting the reference Sscrofa11.1 v.103 assembly between  
284 exonic and intronic features. The exonic fraction displayed an average of 1,923.94  
285 estimated counts per gene, whereas the intronic fraction showed an average of 83.02  
286 counts per gene. In other words, exonic counts were ~23 fold more abundant than those  
287 corresponding to intronic regions.

288 Differential expression analyses based on exonic fractions identified 454 DE genes.  
289 Among those, only genes with  $|FC| > 2$  were retained, making a total of 52 upregulated  
290 and 80 downregulated genes in the *AL-T0* vs *AL-T2* comparison (**Table S4, Fig. S2A**).  
291 Besides, differential expression analyses on small RNA-seq data revealed 16 DE  
292 miRNAs, of which 8 were upregulated in *AL-T2* pigs, representing 6 unique miRNA seeds  
293 (**Table S5**). These non-redundant seeds of significantly upregulated miRNAs in fed  
294 animals (*ssc-miR-148a-3p*, *ssc-miR-7-5p*, *ssc-miR-30-3p*, *ssc-miR-151-3p*, *ssc-miR-*  
295 *374a-3p* and *ssc-miR-421-5p*) were selected as potential post-transcriptional regulators  
296 of GM muscle mRNA expression in response to nutrient supply. EISA results made  
297 possible to detect 133 genes with significant effects (**Table S6**), of which three had  $> 2$ -

298 folds reduced  $\Delta\text{Ex}$  fractions and two of them had significantly negative PTc scores (**Table**  
 299 **1**).

300 To detect mRNA genes putatively downregulated by miRNAs at the post-transcriptional  
 301 level, mRNA genes displaying the top 5% negative PTc scores with at least 2-folds  $\Delta\text{Ex}$   
 302 reduction were selected as putative miRNA-targets (**Fig. S2B**). With this approach, 26  
 303 mRNA genes were selected (**Table 1**). One of them (ENSSSCG00000049158) did not  
 304 have a properly annotated 3'-UTR so it was excluded from further analyses. Among this  
 305 set of genes with high post-transcriptional signals, 18 appeared as significantly  
 306 downregulated ( $\text{FC} < -2$ ;  $q\text{-value} < 0.05$ ) in the differential expression analysis  
 307 considering their exonic fractions (**Table 1** and **Table S4**).

308

309

310 **Table 1:** mRNA genes with the top 5% post-transcriptional (PTc) scores and at least 2-  
 311 folds exonic fraction ( $\Delta\text{Ex}$ ) reduction (equivalent to -1 in the  $\log_2$  scale) from *gluteus*  
 312 *medius* skeletal muscle expression profiles of fasting (*AL-T0*, N = 11) and fed (*AL-T2*, N  
 313 = 12) Duroc gilts.

| ID                  | Gene           | $\log_2\text{FC}$ | $\Delta\text{Ex}$ | PTc    | P-value   | q-value   | DE | miRNA target |
|---------------------|----------------|-------------------|-------------------|--------|-----------|-----------|----|--------------|
| ENSSSCG00000032094  | <i>DKK2</i>    | -2.010            | -1.431            | -4.738 | 1.654E-05 | 3.830E-03 | •  | x            |
| ENSSSCG00000015334  | <i>PDK4</i>    | -2.108            | -5.250            | -4.698 | 4.693E-03 | 1.330E-01 | x  | x            |
| ENSSSCG00000015037  | <i>IL18</i>    | -1.655            | -1.191            | -3.682 | 4.787E-03 | 1.340E-01 | •  | x            |
| ENSSSCG00000005385  | <i>NR4A3</i>   | -1.337            | -3.082            | -3.646 | 4.038E-02 | 4.098E-01 | x  | x            |
| ENSSSCG00000003766  | <i>DNAJB4</i>  | -1.391            | -1.008            | -3.348 | 8.358E-03 | 1.905E-01 |    | x            |
| ENSSSCG00000015969  | <i>CHRNA1</i>  | -1.561            | -1.339            | -3.341 | 2.606E-03 | 9.406E-02 | x  | x            |
| ENSSSCG00000039419  | <i>SLCO4A1</i> | -1.055            | -2.279            | -3.180 | 2.820E-02 | 3.544E-01 | x  | x            |
| ENSSSCG000000049158 |                | -1.107            | -1.096            | -3.164 | 3.182E-02 | 3.735E-01 |    | x            |
| ENSSSCG00000004347  | <i>FBXL4</i>   | -1.298            | -1.126            | -3.133 | 1.422E-03 | 6.520E-02 | x  | x            |
| ENSSSCG00000004979  | <i>MYO9A</i>   | -1.239            | -1.003            | -3.043 | 7.296E-03 | 1.731E-01 |    | x            |
| ENSSSCG00000013351  | <i>NAV2</i>    | -1.163            | -1.196            | -2.863 | 2.605E-04 | 2.301E-02 | x  | x            |
| ENSSSCG000000032741 | <i>TBC1D9</i>  | -0.913            | -1.061            | -2.736 | 1.534E-02 | 2.583E-01 | •  | x            |
| ENSSSCG000000031728 | <i>ABRA</i>    | -1.238            | -1.393            | -2.704 | 1.295E-03 | 6.116E-02 | x  | x            |
| ENSSSCG00000006331  | <i>PBX1</i>    | -0.891            | -1.039            | -2.480 | 1.135E-02 | 2.177E-01 | x  | x            |
| ENSSSCG000000035037 | <i>SIK1</i>    | -1.357            | -1.289            | -2.475 | 3.999E-03 | 1.212E-01 | x  | x            |
| ENSSSCG000000038374 | <i>CIART</i>   | -1.027            | -1.321            | -2.052 | 1.543E-02 | 2.587E-01 | x  |              |

|                    |               |        |        |        |           |           |   |   |
|--------------------|---------------|--------|--------|--------|-----------|-----------|---|---|
| ENSSSCG00000023806 | <i>LRRN1</i>  | -0.776 | -1.013 | -1.983 | 1.580E-01 | 7.074E-01 |   | x |
| ENSSSCG00000009157 | <i>TET2</i>   | -0.381 | -1.123 | -1.792 | 4.880E-01 | 9.582E-01 |   | x |
| ENSSSCG00000011133 | <i>PFKFB3</i> | -0.022 | -2.256 | -1.785 | 9.712E-01 | 9.987E-01 | x | x |
| ENSSSCG00000002283 | <i>FUT8</i>   | -0.578 | -1.286 | -1.784 | 9.887E-02 | 6.059E-01 | x | x |
| ENSSSCG00000023133 | <i>OSBPL6</i> | -0.432 | -1.088 | -1.772 | 3.835E-01 | 9.108E-01 | x |   |
| ENSSSCG00000017986 | <i>NDELI</i>  | -0.767 | -1.644 | -1.759 | 1.006E-02 | 2.081E-01 | x | x |
| ENSSSCG00000031321 | <i>NR4A1</i>  | -0.630 | -1.328 | -1.720 | 6.298E-02 | 5.006E-01 | x |   |
| ENSSSCG00000035101 | <i>KLF5</i>   | -0.519 | -1.487 | -1.708 | 2.942E-01 | 8.488E-01 | x | x |
| ENSSSCG00000004332 | <i>BACH2</i>  | -0.714 | -2.105 | -1.705 | 9.089E-02 | 5.861E-01 | x | x |
| ENSSSCG00000017983 | <i>PER1</i>   | -0.773 | -1.073 | -1.627 | 3.000E-02 | 3.662E-01 | x |   |

314

315 <sup>a</sup>Log<sub>2</sub>FC: estimated log<sub>2</sub> fold change for mean exonic fractions from *gluteus medius* expression profiles of fasted *AL-*  
316 *T0* and fed *AL-T2* Duroc gilts; <sup>b</sup>ΔEx: exonic fraction increment (Ex<sub>2</sub> – Ex<sub>1</sub>) when comparing exon abundances in *AL-*  
317 *T0* (Ex<sub>1</sub>) vs *AL-T2* (Ex<sub>2</sub>) Duroc gilts; <sup>c</sup>PTc: post-transcriptional signal (ΔEx – ΔInt) in z-score scale; <sup>d</sup>q-value: q-value  
318 calculated with the false discovery rate (FDR) approach [39]. The “x” symbols represent differentially expressed (DE)  
319 genes (FC < -2; q-value < 0.05) according to their exonic fractions, as well as those targeted by at least one of the  
320 upregulated miRNAs excluding redundant seeds (N = 6, **Table S5**). The “•” symbol represents suggestive differential  
321 expression (P-value < 0.01, **Table S4**).

322

323

324 *Context-based pruning of predicted miRNA-mRNA interactions removes spurious*  
325 *unreliable target events*

326 As a first step to determine if genes with highly negative PTc scores and showing a  
327 marked reduction in exonic fractions were repressed by upregulated DE miRNAs (**Table**  
328 **S5**), we investigated the accuracy and reliability of *in silico* predictions regarding miRNA  
329 binding sites in their 3’-UTRs (**Table S7**). We evaluated the presence of enriched binding  
330 sites over a random background of expressed genes with no context-based removal of  
331 predicted binding sites, applying each one of the three selection criteria reported in  
332 **Methods** independently, as well as by combining them pairwise or altogether. As depicted  
333 in **Fig. S3A** and **S3B**, introducing additional context-based filtering criteria for removing  
334 spurious unreliable binding site predictions resulted in an overall increased enrichment of  
335 miRNA targeted genes within the top 1% (**Fig. S3A**) and 5% (**Fig. S3B**) negative PTc

336 scores and displaying > 2-folds  $\Delta$ Ex reduction. This significantly increased enrichment  
337 was more evident when using the AU criterion, as shown in **Fig. S3A**. However, we also  
338 detected a slight increment when adding the other two context-based removal criteria (M  
339 and E). These findings were less evident when taking into consideration the list of the top  
340 5% genes (**Fig. S3B**). Nevertheless, an increased enrichment for targeted mRNAs by DE  
341 upregulated miRNAs was detectable for all combined filtering criteria, especially for  
342 7mer-A1 binding sites, and probably at the expense of the scarcer and more efficient 8mer  
343 binding sites. Based on these results, we decided to apply the three joint criteria (AU, M  
344 and E) for enrichment analyses between the set of mRNA genes with high post-  
345 transcriptional signals and putatively targeted by miRNAs.

346

347 *Genes with relevant post-transcriptional signals are enriched for putative miRNA binding*  
348 *sites in their 3'-UTRs*

349 Target prediction and context-based pruning of miRNA-mRNA interactions for mRNA  
350 genes displaying the top 5% negative PTC scores and at least 2-folds reductions in the  
351  $\Delta$ Ex exonic fraction (N = 25 after excluding ENSSSCG00000049158; **Fig. 1A**) made  
352 possible to detect 11 8mer, 21 7mer-m8 and 22 7mer-A1 miRNA binding sites (**Table**  
353 **S7**) corresponding to the 6 non-redundant seeds of DE miRNAs upregulated in *AL-T2*  
354 gilts. This set of 25 mRNA genes showing putative post-transcriptional repression by  
355 miRNAs showed a significant enrichment in 8mer, 7mer-m8 and 7mer-A1 sites (**Fig. 1B**),  
356 and this was especially relevant when combining these three types of binding sites. More  
357 importantly, 21 out of these 25 genes were predicted as putative targets of miRNAs  
358 upregulated in the GM muscle samples from *AL-T2* fed gilts (**Table 1** and **Table S5**).  
359 We also evaluated the enrichment of the mRNA genes with the top 5% negative PTC  
360 scores and at least 2-folds  $\Delta$ Ex reduction (N = 25, **Table 1**) to be targeted by the following

361 sets of miRNAs: (i) Non-redundant miRNAs downregulated in *AL-T2* fed gilts (ssc-miR-  
362 1285, ssc-miR-758, ssc-miR-339, sc-miR-22-3p, ssc-miR-296-5p, ssc-miR-129a-3p, ssc-  
363 miR-181c and ssc-miR-19b, **Table S5**), (ii) the top 5% most expressed miRNAs,  
364 excluding those being upregulated (ssc-miR-1, ssc-miR-133a-3p, ssc-miR-26a, ssc-miR-  
365 10b, ssc-miR-378, ssc-miR-99a-5p, ssc-miR-27b-3p, ssc-miR-30d, ssc-miR-486 and ssc-  
366 let-7f-5p), and (iii) for an iteration ( $N = 100$ ) of random sets of 10 expressed miRNAs,  
367 irrespective of their DE and abundance status, as a control test. None of these additional  
368 analyses recovered a significant enrichment for any type of the three considered miRNA  
369 target subtypes (**Fig. 1B**).

370 The mRNA with the highest and significant PTC score was the Dickkopf WNT Signaling  
371 Pathway Inhibitor 2 (*DKK2*), and thus, this was the gene with the highest putative  
372 miRNA-driven downregulation and no additional transcriptional influence (**Table 1**).  
373 Moreover, the *DKK2* locus was the only gene harboring two miRNA 8mer binding sites  
374 (**Table S7**), although it was not among the most highly DE mRNA genes according to  
375 differential expression analyses (**Table S4**). As depicted in **Table 1**, only suggestive  
376 significant differences ( $P$ -value  $< 0.01$ ) in mean expression were found for *DKK2*  
377 transcripts. Besides, among the set of mRNA genes displaying the top 5% PTC scores and  
378 at least 2-folds  $\Delta Ex$  reduction (**Table 1**), 5 were not DE, and 3 of them only showed  
379 suggestive DE, while the rest of DE mRNAs displayed a wide range of significance  
380 (**Table S4**). The divergence between EISA and differential expression results is also  
381 shown in **Fig. 1C**, where not all the mRNA genes highlighted by EISA (**Fig. 1A**) were  
382 DE downregulated loci.

383 The miRNAs with the highest number of significant miRNA-mRNA interactions (in  
384 terms of correlations between their expression levels) were ssc-miR-30a-3p and ssc-miR-  
385 421-5p, which showed 9 and 8 significant miRNA-mRNA interactions, followed by ssc-



386 miR-148-3p with 4 significant interactions with mRNA genes showing significant post-  
387 transcriptional signals (**Table S7**).

388

389 Genes showing post-transcriptional regulatory signals predominantly covary at the  
390 exonic level

391 To further elucidate whether genes displaying the top 5% PTC scores are strong candidates  
392 to be regulated by miRNAs according to *in silico* predictions (N = 21), we evaluated the  
393 covariation patterns among them and with the whole set of 454 mRNA genes DE between  
394 *AL-T0* and *AL-T2* gilts.

395 By calculating CES values (see Methods) for the 21 genes putatively targeted by DE  
396 upregulated miRNAs, we obtained an estimation of the fold change in their observed  
397 covariation with respect to other 435 DE mRNAs. CES values were measured for both  
398 their exonic and intronic fractions. Our analyses revealed that 19 out of these 21 genes  
399 showed an increased covariation of approximately 2-folds in their exonic fractions when  
400 compared to their intronic fractions (**Table S8, Fig. 1D**). When we iteratively analyzed  
401 the observed fold change in covariation for random sets of genes (N = 1,000), they  
402 displayed  $CES \approx 1$ , indicative of no covariation (**Fig. 1D**). The observed CES  
403 distributions of exonic, intronic and control sets were significantly different ( $P$ -value =  
404 3.663E-06) after running non-parametric tests (**Fig. 1D**), thus supporting that the genes  
405 displaying the top 5% PTC scores are probably repressed by DE upregulated miRNAs.

406

407

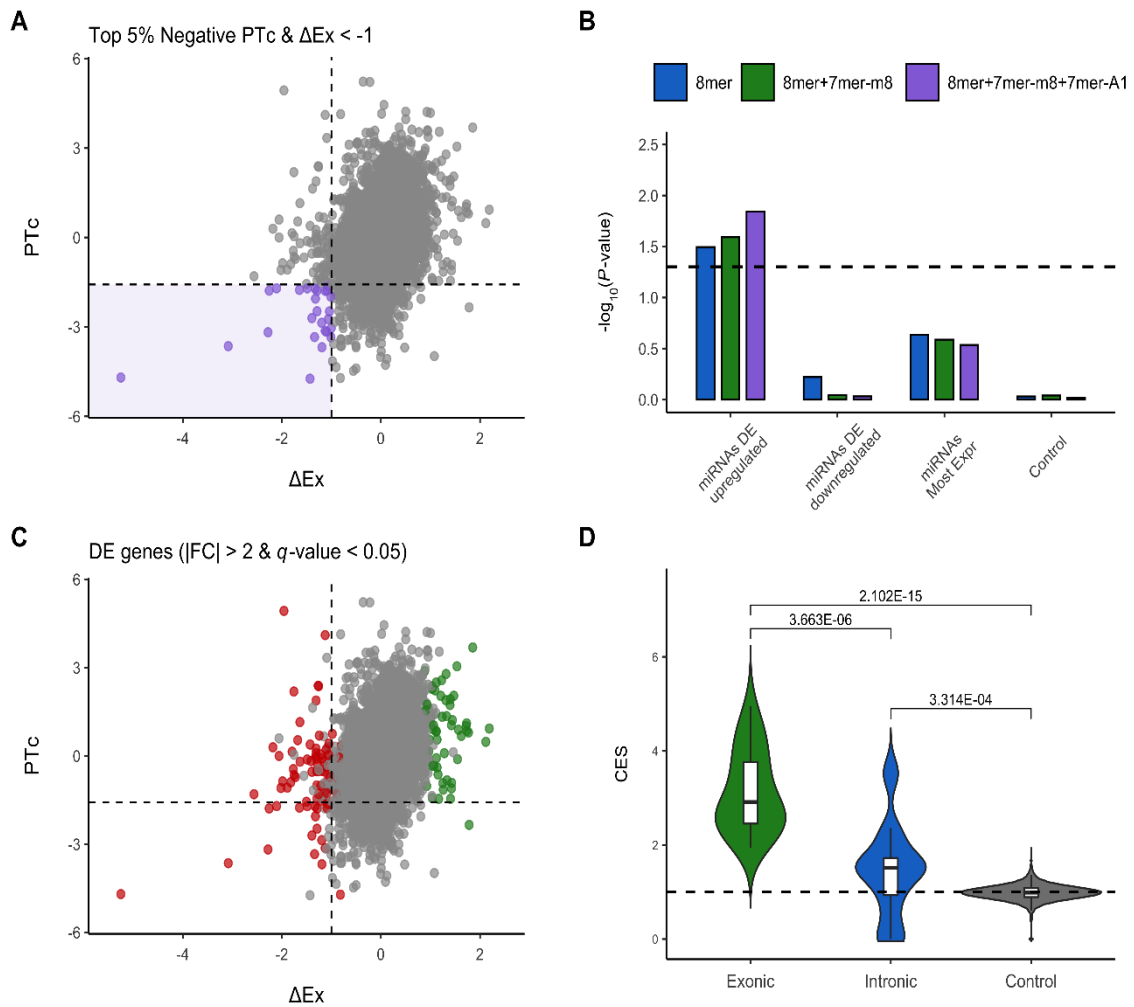

408

409

410 **Figure 1:** (A) Scatterplot depicting mRNA genes with the top 5% negative PTC scores  
 411 and at least 2-folds  $\Delta\text{Ex}$  reduction according to exonic ( $\Delta\text{Ex}$ ) and PTC ( $\Delta\text{Ex} - \Delta\text{Int}$ ) values  
 412 (in purple) and putatively targeted by DE upregulated miRNAs ( $FC > 1.5$ ;  $q\text{-value} < 0.05$ )  
 413 from *gluteus medius* skeletal muscle expression profiles of fasted (*AL-T0*,  $N = 11$ ) and  
 414 fed (*AL-T2*,  $N = 12$ ) Duroc gilts. (B) Enrichment analyses of the number of mRNA genes  
 415 with the top 5% negative PTC scores and at least 2-folds  $\Delta\text{Ex}$  reduction putatively targeted  
 416 by DE upregulated miRNAs ( $FC > 1.5$ ;  $q\text{-value} < 0.05$ ), DE downregulated miRNAs ( $FC$   
 417  $< -1.5$ ;  $q\text{-value} < 0.05$ ) and the top 5% most highly expressed miRNAs, excluding DE  
 418 upregulated miRNAs. (C) Scatterplot depicting DE upregulated (in green) and  
 419 downregulated (in red) mRNA genes ( $|FC| > 2$ ;  $q\text{-value} < 0.05$ ) according to exonic ( $\Delta\text{Ex}$ )

420 and PTc ( $\Delta\text{Ex} - \Delta\text{Int}$ ) values. **(D)** Covariation enrichment scores (CES) for the exonic  
421 and intronic fractions of mRNA genes with the top 5% negative PTc scores and at least  
422 2-folds  $\Delta\text{Ex}$  reduction, putatively targeted by upregulated miRNAs from *gluteus medius*  
423 skeletal muscle expression profiles of fasted (*AL-T0*, N = 11) and fed (*AL-T2*, N = 12)  
424 Duroc gilts. The control set of CES values were generated by permuted (N = 1,000)  
425 random sets of exonic and intronic profiles of genes with the same size as those used  
426 before (N = 21). Significant differences were assessed using a Mann-Whitney U non-  
427 parametric test [48].

428

429

### 430 **3.2. Studying post-transcriptional signals in fat metabolism using an independent** 431 **Duroc-Göttingen minipig population**

432 After pre-processing and filtering of sequenced reads from adipocytes samples, we were  
433 able to retrieve ~98.1 and ~0.87 million mRNA and small RNA reads per sample, and  
434 ~96.5% and ~73.4% of these reads mapped to annotated porcine mRNA and miRNA  
435 genes, respectively. Differential expression analyses revealed a total of 299 DE mRNAs,  
436 of which 52 were downregulated and 95 were upregulated, respectively (**Table S9**).  
437 Regarding miRNAs, only one gene (*ssc-miR-92b-3p*) was significantly upregulated in  
438 *lean* pigs, while 7 additional miRNAs showed suggestive differential expression (*P*-value  
439 < 0.01), of which 4 were downregulated, and one (*ssc-miR-92a*) had the same seed  
440 sequence as *ssc-miR-92b-3p* (**Table S10**).

441 After running EISA on the mRNA expression profiles for exonic and intronic fractions,  
442 a total of 44 downregulated mRNAs in *lean* pigs displayed the top 5% PTc scores with  
443 reduced  $\Delta\text{Ex} > 2$ -folds (**Table S11, Fig. 2A**). One of them (ENSSSCG00000016928) did  
444 not have a properly annotated 3'-UTR so it was excluded from further analyses. The

445 whole set of mRNA genes from EISA results is available at **Table S12**. Among this set  
446 of genes with high post-transcriptional signals, 13 appeared as significantly  
447 downregulated ( $FC < -2$ ;  $q$ -value  $< 0.05$ ) and 9 had suggestive repression ( $P$ -value  $< 0.01$ )  
448 in the differential expression analysis considering their exonic fractions (**Table S9** and  
449 **S11**). In this dataset, the sestrin 3 (*SESN3*) locus showed the second highest negative PTC  
450 score, but was the only one among the rest of highlighted genes where a significant post-  
451 transcriptional signal was observed (**Table S11**), i.e., equivalent to the *DKK2* gene in  
452 Duroc pigs, this was the only locus showing post-transcriptional regulation with no  
453 additional co-occurring transcriptional signal. Such strong downregulation was also  
454 evidenced in differential expression analyses, where it was the most significantly DE gene  
455 (**Table S9**).

456 From the set of downregulated genes, 25 out of the 43 mRNA genes analyzed for miRNA  
457 binding sites were classified as putative targets of the set of miRNAs upregulated in *lean*  
458 pigs (ssc-miR-92b-3p, ssc-miR-148a-3p, ssc-miR-204 and ssc-miR-214-3p; **Table S10**).  
459 Target prediction and context-based pruning of miRNA-mRNA interactions for these 43  
460 mRNA genes made it possible to detect 8 8mer, 21 7mer-m8 and 24 7mer-A1 miRNA  
461 binding sites (**Table S13**) corresponding to the non-redundant seeds of selected  
462 upregulated miRNAs ( $N = 4$ ) in *lean* minipigs (**Table S10**). The *SESN3* gene showed the  
463 highest number of predicted putative miRNA target sites in its 3'-UTR (**Table S13**).

464 Enrichment analyses for the set of putative miRNA target genes with the top 5% negative  
465 PTC scores and at least 2-folds  $\Delta Ex$  reduction ( $N = 25$ , **Table S11**) revealed no significant  
466 enrichment for the three types of miRNA target sites considered, although a slight  
467 increase when considering 8mer + 7mer-m8 binding sites and all three types together  
468 could be observed (**Fig. 2B**). Among this set of 25 genes, 7 appeared as significantly  
469 downregulated ( $FC < -2$ ;  $q$ -value  $< 0.05$ ) and 6 had suggestive repression ( $P$ -value  $< 0.01$ )

470 in the differential expression analysis considering their exonic fractions (**Table S9** and  
471 **S11, Fig. 2C**).

472 In agreement with results obtained for the first studied skeletal muscle expression dataset,  
473 the exonic fraction of the mRNA genes putatively targeted by upregulated miRNAs in  
474 lean pigs showed approximately 2-folds significantly increased covariation ( $P$ -value =  
475 2.703E-02) with regard to their intronic fraction (**Fig. 2D**). Besides, 18 out of these 25  
476 mRNA genes showed an overall increased covariation in their exonic fractions compared  
477 with their intronic fractions, expressed as the increment in their CES values ( $\Delta$ CES =  
478 exonic CES – intronic CES, **Table S14**).

479 Because adipose tissue samples were available, qPCR analyses were performed to assess  
480 whether mRNAs among the top 5% negative P<sub>Tc</sub> scores and with at least 2-folds  $\Delta$ Ex  
481 reduction together with upregulated miRNAs displayed patterns of expression consistent  
482 with those obtained in the RNA-seq and small RNA-seq experiments. To this end, we  
483 selected five mRNAs (*LEP*, *OSBPL10*, *PRSS23*, *RNF157* and *SERPINE2*) and 3 miRNAs  
484 (ssc-miR-148a-30, ssc-miR-214-3p and ssc-miR-92b-3p) for qPCR verification. All the  
485 analyzed mRNA genes showed a reduced expression in *lean* pigs compared with their  
486 *obese* counterparts (**Fig. 2E**) and the *LEP* gene was the most significantly downregulated  
487 gene ( $\log_2$ FC = -1.953;  $P$ -value = 1.120E-03). This result was in agreement with the  
488 strong downregulation observed in differential expression analyses based on RNA-Seq  
489 data ( $\log_2$ FC = -1.957;  $q$ -value = 3.443E-03, **Table S9**). With regard to miRNAs, the  
490 opposite pattern of expression was observed, with all the three profiled miRNA genes  
491 being upregulated in *lean* pigs. Moreover, as reported in **Table S10**, ssc-miR-92b-3p was  
492 the miRNA with the most significant upregulation as evidenced in qPCR analyses ( $P$ -  
493 value = 3.57E-02, **Fig. 2F**).

494

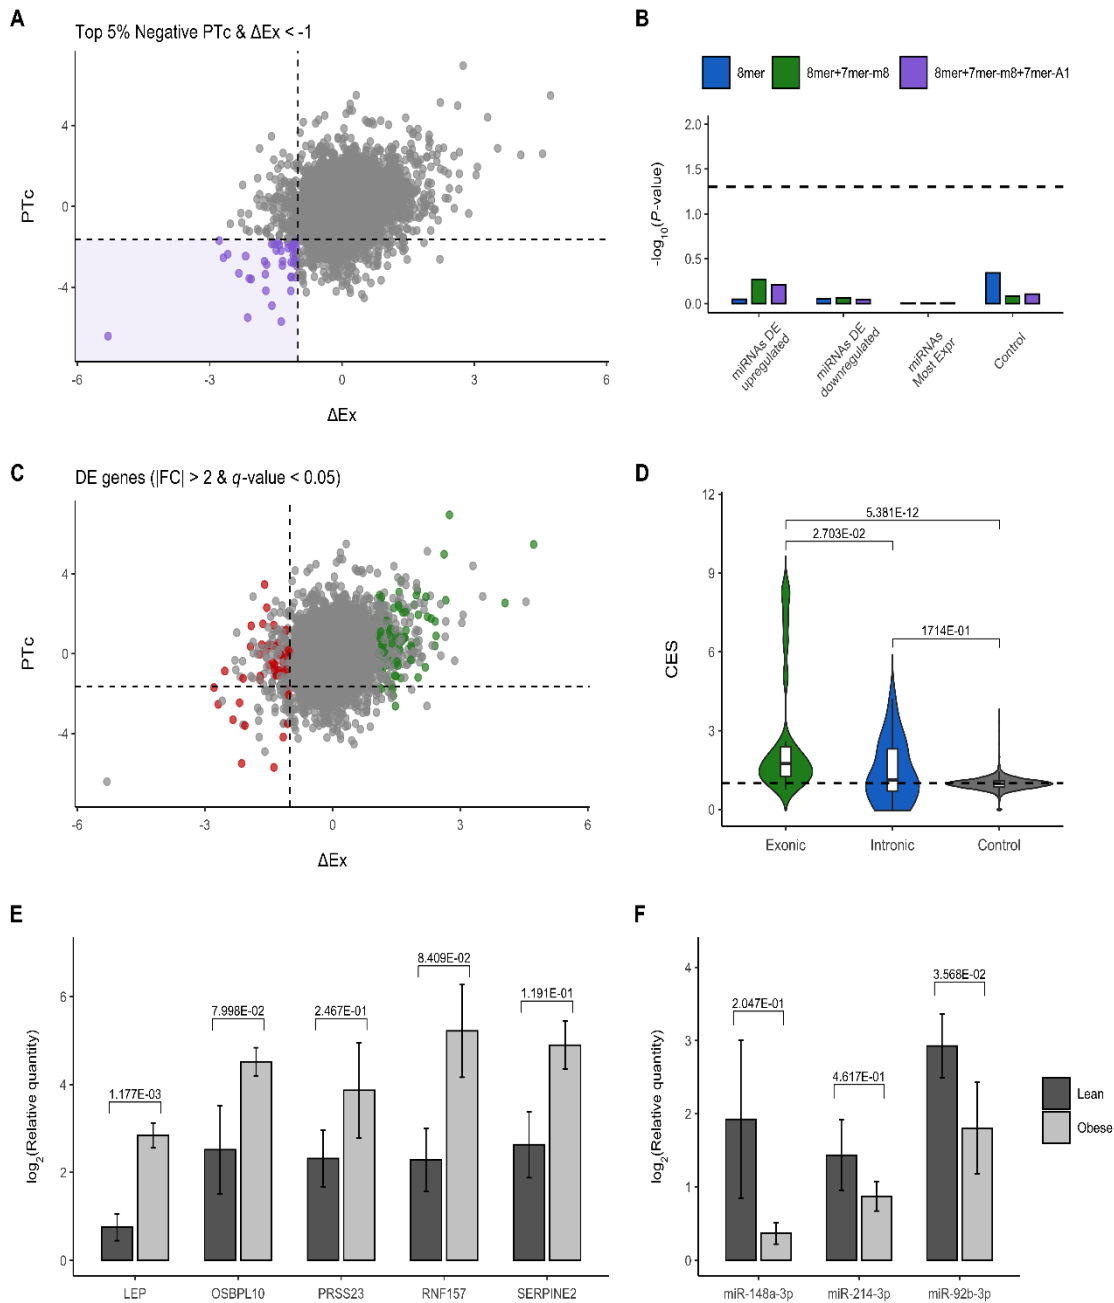

495

496

497 **Figure 2:** (A) Scatterplot depicting mRNA genes with the top 5% negative PTC scores  
 498 and at least 2-folds  $\Delta Ex$  reduction according to exonic ( $\Delta Ex$ ) and PTC ( $\Delta Ex - \Delta Int$ ) values  
 499 (in purple) and putatively targeted by upregulated miRNAs ( $FC > 1.5$ ;  $P\text{-value} < 0.01$ )  
 500 from adipocyte expression profiles of *lean* ( $N = 5$ ) and *obese* ( $N = 5$ ) Duroc-Göttingen  
 501 minipigs according to their body mass index (BMI). (B) Enrichment analyses of the  
 502 number of mRNA genes with the top 5% negative PTC scores and at least 2-folds  $\Delta Ex$

503 reduction putatively targeted by DE upregulated miRNAs ( $FC > 1.5$ ;  $q$ -value  $< 0.05$ ), DE  
504 downregulated miRNAs ( $FC < -1.5$ ;  $q$ -value  $< 0.05$ ) and the top 5% most highly  
505 expressed miRNAs, excluding DE upregulated miRNAs. (C) Scatterplot depicting DE  
506 upregulated (in green) and downregulated (in red) mRNA genes ( $|FC| > 2$ ;  $q$ -value  $< 0.05$ )  
507 according to exonic ( $\Delta Ex$ ) and PTc ( $\Delta Ex - \Delta Int$ ) values. (D) Covariation enrichment  
508 scores (CES) for the exonic and intronic fractions of mRNA genes with the top 5%  
509 negative PTc scores and at least 2-folds  $\Delta Ex$  reduction, putatively targeted by upregulated  
510 miRNAs from adipocyte expression profiles of *lean* ( $N = 5$ ) and *obese* ( $N = 5$ ) Duroc-  
511 Göttingen minipigs. The control set of CES values were generated by permuted ( $N =$   
512 1,000) random sets of exonic and intronic profiles of genes with the same size as those  
513 used before ( $N = 25$ ). Significant differences were assessed using a Mann-Whitney U  
514 non-parametric test [48]. (E) Barplots depicting qPCR  $\log_2$  transformed relative  
515 quantities (Rq) for *LEP*, *OSBPL10*, *PRSS23*, *RNF157* and *SERPINE2* mRNA transcripts  
516 measured in adipocytes from the retroperitoneal fat of *lean* ( $N = 5$ ) and *obese* ( $N = 5$ )  
517 Duroc-Göttingen minipigs. (F) Barplots depicting qPCR  $\log_2$  transformed relative  
518 quantities (Rq) for ssc-miR-148a-3p, ssc-miR-214-3p and ssc-miR-92b-3p miRNA  
519 transcripts measured in the isolated adipocytes from the retroperitoneal fat of *lean* ( $N =$   
520 5) and *obese* ( $N = 5$ ) Duroc-Göttingen minipigs.

521

522

## 523 **4. Discussion**

524 In this study, we undertook the inference of functional miRNA-mRNA interactions using  
525 EISA for post-transcriptional signals prioritization, combined with target prediction of  
526 upregulated miRNAs, as well as enrichment and covariation analyses.

527 We observed that the majority of mRNA genes with highly negative PTc scores, i.e.,  
528 predominantly downregulated at their exonic fractions, also had a coordinated  
529 downregulatory effect of their intronic fractions, taken as a proxy of transcriptional  
530 repression. This was evidenced by the overall low significance of post-transcriptional  
531 signals within the mRNA genes with the top 5% negative PTc scores and reduced  $\Delta Ex$  in  
532 both analyzed experimental conditions. Only two genes (*DKK2* and *NAV2*) in *AL-T0* vs  
533 *AL-T2* and one gene (*SESN3*) in the *lean* vs *obese* contrasts showed significant PTc  
534 scores, revealing that, overall, a coordinated downregulatory effect at both transcriptional  
535 and post-transcriptional levels was present, which is in agreement with previous studies  
536 using EISA [14,15]. However, it is worth noting that we did not consider the significance  
537 of PTc scores as a relevant criterion for prioritizing putative post-transcriptionally  
538 downregulated genes, as these will appear as significant when the post-transcriptional  
539 activity is the only mechanism modulating the target gene expression profile. Only co-  
540 occurring yet opposite transcriptional and post-transcriptional events or single post-  
541 transcriptional signals would arise as significant, excluding genes with both coordinated  
542 downregulation at the transcriptional and post-transcriptional level.

543 We decided to use the intronic fraction of expressed mRNAs as a proxy of their  
544 transcriptional activity, a source of yet unspliced mRNA transcripts leading to the  
545 accumulation of intronic sequences prior to their debranching and degradation by  
546 exonucleases. This allows the use of RNA-seq datasets to apply EISA without the need  
547 of further experimental procedures, and it can also be applied to investigate transcriptional  
548 regulatory signals [15]. Previous reports have also explored the use of specific techniques  
549 to capture nascent mRNA transcripts before they are spliced [50–52], and these have been  
550 used to account for the transcriptional activity in a similar approach to EISA [53].  
551 Although more advanced methodologies measuring nascent transcription of mRNAs



552 might provide a better resolution for future experimental designs [54], EISA would still  
553 be useful to explore the large amount of available RNA-seq data where additional  
554 experiments are no longer possible.

555 Since the efficacy of miRNA-based regulation on mRNA targets depends on the context  
556 of the target site within the 3'-UTR [43], we have described the usefulness of introducing  
557 context-based filtering criteria for removing spurious *in silico*-predicted target sites for  
558 miRNAs. Using enrichment analyses, we were able to link the downregulated mRNAs at  
559 their exonic fractions to upregulated miRNAs that were putatively targeting them and  
560 triggering their observed decay in differential expression analyses. The influence of other  
561 non-DE highly expressed miRNAs or downregulated miRNAs was discarded by the lack  
562 of predicted targeted mRNA genes with high post-transcriptional downregulatory signals  
563 for such miRNAs. Overall, the increase in enrichment significance shown for targeted  
564 mRNAs with post-transcriptional signals by upregulated miRNAs revealed the ability of  
565 context-based filtering criteria to discriminate and remove weak or false positive target  
566 sites located within unfavored regions of the 3'-UTR. However, highly efficient target  
567 sites such as those of type 8mer, although scarcer than 7mer-m8 sites, might still be  
568 functional even at unfavored positions [43,55,56]. This may partially explain the relative  
569 lack of 8mer sites found in the top post-transcriptionally regulated mRNA genes in both  
570 experimental setups.

571 Although miRNAs were the major post-transcriptional regulators that we considered in  
572 this study, it is important to remark that other additional post-transcriptional  
573 modifications and interactions might be responsible for the observed downregulation of  
574 mRNAs. For instance, long non-coding RNAs [57], circular RNAs [58,59], RNA  
575 methylation [60] or RNA binding proteins [61–63] can all act as post-transcriptional  
576 regulators of targeted mRNAs. We further hypothesized that genes showing relevant post-

577 transcriptional downregulatory effects might be regulated by the same set of significantly  
578 upregulated miRNAs, which could induce shared covariation in their expression profiles  
579 at the exonic level. On the contrary, their intronic fractions would be mainly unaffected,  
580 as introns would have been excised prior to any given miRNA-driven downregulation, if  
581 occurring. In this way, an increased gene covariation might be detectable within the sets  
582 of commonly targeted mRNA genes with relevant post-transcriptional signals at the exon  
583 but not at the intron level, as opposed to covariation events of these set of genes with the  
584 rest of DE genes. Our results revealed an increased degree of covariation between genes  
585 with high post-transcriptional signals at their exonic fractions, highlighting a putative  
586 coordinated downregulation by the set of significantly upregulated miRNAs.

587 From the analysis of top mRNA genes showing the strongest post-transcriptional  
588 downregulatory effects in fasted vs fed gilts, several biological functions putatively  
589 regulated by miRNAs were revealed. The *DKK2* gene was the one showing the highest  
590 negative PTC score, and its post-transcriptional regulatory signal was also significant,  
591 indicating that no additional coordinated transcriptional downregulation was found for  
592 this particular gene. Moreover, this gene also showed the strongest covariation difference  
593 in its exonic fraction compared with its intronic fraction. This consistent post-  
594 transcriptional regulatory effect might be explained by the presence of two miRNA target  
595 sites of type 8mer in its 3'-UTR for ssc-miR-421-5p and ssc-miR-30a-3p, two highly DE  
596 and upregulated miRNAs. Besides, ssc-miR-30e-3p, a miRNA sharing its seed and  
597 regulatory effect with ssc-miR-30a-3p, was also upregulated in fed (*AL-T2*) gilts, which  
598 would reinforce the repression of their targeted mRNA transcripts. The *DKK2* gene is a  
599 member of the dickkopf family that inhibits the Wnt signaling pathway through its  
600 interaction with the LDL-receptor related protein 6 (LRP6). Its repression has been  
601 associated with reduced blood-glucose levels and improved glucose uptake [64], as well

602 as with improved adipogenesis [65] and inhibition of aerobic glycolysis [66]. These  
603 results agreed with the increased glucose usage and triggered adipogenesis in muscle  
604 tissue after nutrient supply. Other additional relevant post-transcriptionally  
605 downregulated mRNA genes found by EISA were: (i) pyruvate dehydrogenase kinase 4  
606 (*PDK4*), a mitochondrial enzyme that inhibits pyruvate to acetyl-CoA conversion and  
607 hinders glucose utilization promoting fatty acids oxidation in energy-deprived cells under  
608 fasting conditions [67,68]; (ii) interleukin 18 (*IL18*), involved in controlling energy  
609 homeostasis in the muscle by inducing AMP-activated protein kinase (AMPK) [69], a  
610 master metabolic regulator that is suppressed upon nutrient influx in cells [70]; (iii)  
611 nuclear receptor subfamily 4 group A member 3 (*NR4A3*), which activates both glycolytic  
612 and glycogenic factors [71], as well as  $\beta$ -oxidation in muscle cells [72]; (iv) acetylcholine  
613 receptor subunit  $\alpha$  (*CHRNA1*) of muscle cells, that is linked to the inhibition of nicotine-  
614 dependent *STAT3* upregulation [73] that results in protection against insulin resistance in  
615 muscle [74]; (v) PBX homeobox 1 (*PBX1*), a regulator of adipocyte differentiation [75];  
616 (vi) Tet methylcytosine dioxygenase 2 (*TET2*), linked to glucose-dependent AMPK  
617 phosphorylation [76]; and (vii) BTB domain and CNC homolog (*BACH2*), associated  
618 with mTOR complex 2 (mTORC2) glucose-dependent activation [77,78] and the  
619 repression of forkhead box protein O1 (*FOXO1*) [79] and *PDK4* in a coordinated manner  
620 [7,80]. Overall, the highlighted downregulated genes in the muscle of gilts after nutrient  
621 supply pointed towards a common regulatory function of miRNAs in modulating glucose  
622 uptake and energy homeostasis pathways of the skeletal myocytes.

623 Alternative post-transcriptional regulatory factors other than miRNAs might explain the  
624 presence of non-miRNA targets within the top post-transcriptional signals related to  
625 regulatory mechanisms not directly involved in energy homeostasis or glucose usage. For  
626 instance, three circadian clock-related mRNA genes that showed high post-transcriptional

627 signals were the circadian associated repressor of transcription (*CIART*), period 1 (*PER1*)  
628 and salt inducible kinase 1 (*SIK1*), yet the first two were not detected as targets of DE  
629 miRNAs. As previously reported for this experimental design [22], the presence of  
630 several genes showing abundance differences might reflect a tight feedback interplay  
631 among them, where their expression and accumulation are coordinately regulated.  
632 Regarding EISA results in RNA-seq profiles of adipocytes from *lean* vs *obese* Duroc-  
633 Göttingen minipigs, several of the mRNA genes that showed high post-transcriptional  
634 repression are involved in the regulation of lipid metabolism and energy homeostasis.  
635 The gene showing the highest post-transcriptional signal was the estrogen related receptor  
636  $\gamma$  (*ESRRG*), which modulates oxidative metabolism and mitochondrial function in  
637 adipose tissue and imposes downregulation of adipocyte differentiation when repressed  
638 [81]. The second locus highlighted by EISA was sestrin 3 (*SESN3*), an activator of  
639 mTORC2 and PI3K/AKT signaling pathway [82] that protects against insulin resistance  
640 and promotes lipolysis when inhibited [83]. This gene showed the most significant  
641 downregulation in *lean* pigs, and gathered multiple putative binding sites for all the four  
642 upregulated miRNAs analyzed. Other genes showing significant post-transcriptional  
643 regulation were the following: The sterile  $\alpha$  motif domain containing 4A (*SAMD4A*) that  
644 has been linked to the inhibition of preadipocyte differentiation and leanness phenotype  
645 in knockdown experiments [84,85]. The prostaglandin F<sub>2</sub>- receptor protein (PTGFR), for  
646 which overexpression has been associated with hypertension and obesity risk [86], and  
647 its repression appears to improve insulin sensitivity and glucose homeostasis [87]. The  
648 expression of serpin E1 and E2 (*SERPINE1*, *SERPINE2*) is linked to obesogenic states  
649 and diabetic symptoms [88], while their inhibition improved glucose metabolism [89].  
650 The serine protease 23 (PRSS23), which regulates insulin sensitivity and cytokine  
651 expression in adipose tissue, and its downregulation confers protective effects against

652 inflammation and reduced fasting glucose level improving insulin resistance [90]. A high  
653 expression of ring finger protein 157 (*RNF157*) has been linked to high fatness profiles  
654 and increased autophagy in adipose tissue [91]. Silencing of ORP10 protein, encoded by  
655 the *OSBLP10* gene, promotes low-density lipoprotein (LDL) synthesis and inhibits  
656 lipogenesis [92]. The serum levels of glycosylphosphatidylinositol phospholipase 1  
657 (GPLD1) are regulated by insulin and glucose metabolism [93] and linked to the  
658 development of insulin resistance and metabolic syndrome [94]. Overexpression of  
659 neutrophil cytosolic 2 (*NCF2*), the gene showing the highest increase in covariation at the  
660 exonic fraction, was described in obese humans [95]. The repression of RAP1 GTPase  
661 activating protein (RAP1GAP) promotes RAP1 activity, which protects against obesity  
662 and insulin and glucose resistance [96,97]. Finally, leptin production was also decreased  
663 in lean pigs. This key adipokine is mainly produced in adipose tissue [98] and regulates  
664 appetite, energy expenditure and body weight [99,100]. In summary, similar to what we  
665 found for glucose metabolism and energy homeostasis in the first experimental  
666 population, we were also able to describe a set of post-transcriptionally downregulated  
667 genes in Duroc-Göttingen minipigs tightly related to adipose tissue metabolism  
668 regulation.

669

670

## 671 **5. Conclusions**

672 In this study we have implemented an exon/intron split analysis of RNA-seq data from  
673 skeletal muscle and adipose tissue of pigs in two independent populations. In this way,  
674 we were able to identify a set of genes putatively regulated by miRNAs at the post-  
675 transcriptional level. Many of these genes were involved in the regulation of energy  
676 homeostasis and development of both skeletal muscle and adipose tissues analyzed in the

677 present study, which were in agreement with metabolic modifications in response to  
678 nutrient supply and the fatness profile of pigs. Overall, the use of EISA for post-  
679 transcriptional signals prioritization combined with target prediction of upregulated  
680 miRNAs, as well as enrichment analyses on the set of selected targeted genes and their  
681 coordinated covariation, reinforced the usefulness of this approach to infer functional  
682 miRNA-mRNA interactions using exonic and intronic fractions of commonly available  
683 RNA-seq datasets.

684

### 685 **Support**

686 The present research work was funded by grants AGL2013-48742-C2-1-R and  
687 AGL2013-48742-C2-2-R awarded by the Spanish Ministry of Economy and  
688 Competitiveness. E. Mármol-Sánchez was funded with a PhD fellowship FPU15/01733  
689 awarded by the Spanish Ministry of Education and Culture (MECD). YRC is recipient of  
690 a Ramon y Cajal fellowship (RYC2019-027244-I) from the Spanish Ministry of Science  
691 and Innovation.

692

### 693 **Data availability**

694 The RNA-seq and small RNA-seq datasets from skeletal muscle tissue used in the current  
695 study are available at the Sequence Read Archive (SRA) database with BioProject codes  
696 PRJNA386796 and PRJNA595998, respectively. For the adipose tissue samples, RNA-  
697 seq and small RNA-seq datasets are available at PRJNA563583 and PRJNA759240.

698

### 699 **Conflict of interest**

700 The authors declare no conflict of interest.

701

## 702 **Acknowledgements**

703 The authors would like to thank the Department of Veterinary Animal Sciences in the  
704 Faculty of Health and Medical Sciences of the University of Copenhagen for providing  
705 sequencing data and their facilities and resources for qPCR experiments. We also  
706 acknowledge Selección Batallé S.A. for providing animal material and the support of the  
707 Spanish Ministry of Economy and Competitivity for the Center of Excellence Severo  
708 Ochoa 2020–2023 (CEX2019-000902-S) grant awarded to the Centre for Research in  
709 Agricultural Genomics (Crag, Bellaterra, Spain). Thanks also to the CERCA  
710 Programme of the Generalitat de Catalunya for their support.

711

712

## 713 **References**

- 714 [1] N.J. Martinez, A.J.M. Walhout, The interplay between transcription factors and  
715 microRNAs in genome-scale regulatory networks, *BioEssays*. 31 (2009) 435–445.  
716 doi:10.1002/bies.200800212.
- 717 [2] D.P. Bartel, Metazoan microRNAs, *Cell*. 173 (2018) 20–51.  
718 doi:10.1016/j.cell.2018.03.006.
- 719 [3] C.M.J. Mentzel, C. Anthon, M.J. Jacobsen, P. Karlskov-Mortensen, C.S. Bruun,  
720 C.B. Jørgensen, J. Gorodkin, S. Cirera, M. Fredholm, Gender and obesity specific  
721 microRNA expression in adipose tissue from lean and obese pigs., *PLoS One*. 10  
722 (2015) e0131650. doi:10.1371/journal.pone.0131650.
- 723 [4] H. Han, S. Gu, W. Chu, W. Sun, W. Wei, X. Dang, Y. Tian, K. Liu, J. Chen, miR-  
724 17-5p regulates differential expression of *NCOA3* in pig intramuscular and  
725 subcutaneous adipose tissue, *Lipids*. 52 (2017) 939–949. doi:10.1007/s11745-017-  
726 4288-4.

- 727 [5] W. Wei, B. Li, K. Liu, A. Jiang, C. Dong, C. Jia, J. Chen, H. Liu, W. Wu,  
728 Identification of key microRNAs affecting drip loss in porcine longissimus dorsi  
729 by RNA-Seq, *Gene*. 647 (2018) 276–282. doi:10.1016/j.gene.2018.01.005.
- 730 [6] S. Xie, X. Li, L. Qian, C. Cai, G. Xiao, S. Jiang, B. Li, T. Gao, W. Cui, L.L. Guan,  
731 An integrated analysis of mRNA and miRNA in skeletal muscle from myostatin-  
732 edited Meishan pigs, *Genome*. 62 (2019) 305–315. doi:10.1139/gen-2018-0110.
- 733 [7] E. Mármol-Sánchez, Y. Ramayo-Caldas, R. Quintanilla, T.F. Cardoso, R.  
734 González-Prendes, J. Tibau, M. Amills, Co-expression network analysis predicts a  
735 key role of microRNAs in the adaptation of the porcine skeletal muscle to nutrient  
736 supply, *J. Anim. Sci. Biotechnol.* 11 (2020) 10. doi:10.1186/s40104-019-0412-z.
- 737 [8] M.A. Iqbal, A. Ali, F. Hadlich, M. Oster, H. Reyer, N. Trakooljul, V. Sommerfeld,  
738 M. Rodehutschord, K. Wimmers, S. Ponsuksili, Dietary phosphorus and calcium in  
739 feed affects miRNA profiles and their mRNA targets in jejunum of two strains of  
740 laying hens, *Sci. Rep.* 11 (2021) 13534. doi:10.1038/S41598-021-92932-3.
- 741 [9] A. Ali, E. Murani, F. Hadlich, X. Liu, K. Wimmers, S. Ponsuksili, In utero fetal  
742 weight in pigs is regulated by microRNAs and their target genes, *Genes*. 12 (2021)  
743 1264. doi:10.3390/genes12081264.
- 744 [10] D. Gaidatzis, L. Burger, M. Florescu, M.B. Stadler, Analysis of intronic and exonic  
745 reads in RNA-seq data characterizes transcriptional and post-transcriptional  
746 regulation, *Nat. Biotechnol.* 33 (2015) 722–729. doi:10.1038/nbt.3269.
- 747 [11] A. Ameer, A. Zaghlool, J. Halvardson, A. Wetterbom, U. Gyllensten, L. Cavelier,  
748 L. Feuk, Total RNA sequencing reveals nascent transcription and widespread co-  
749 transcriptional splicing in the human brain., *Nat. Struct. Mol. Biol.* 18 (2011)  
750 1435–40. doi:10.1038/nsmb.2143.
- 751 [12] J.M. Gray, D.A. Harmin, S.A. Boswell, N. Cloonan, T.E. Mullen, J.J. Ling, N.



- 752 Miller, S. Kuersten, Y.-C. Ma, S.A. McCarroll, S.M. Grimmond, M. Springer,  
753 SnapShot-Seq: a method for extracting genome-wide, in vivo mRNA dynamics  
754 from a single total RNA sample., *PLoS One.* 9 (2014) e89673.  
755 doi:10.1371/journal.pone.0089673.
- 756 [13] G.-J. Hendriks, D. Gaidatzis, F. Aeschmann, H. Großhans, Extensive oscillatory  
757 gene expression during *C. elegans* larval development., *Mol. Cell.* 53 (2014) 380–  
758 92. doi:10.1016/j.molcel.2013.12.013.
- 759
- 760 [14] J. Cursons, K.A. Pillman, K.G. Scheer, P.A. Gregory, M. Foroutan, S. Hediye-  
761 Zadeh, J. Toubia, E.J. Crampin, G.J. Goodall, C.P. Bracken, M.J. Davis,  
762 Combinatorial targeting by microRNAs co-ordinates post-transcriptional control  
763 of EMT, *Cell Syst.* 7 (2018) 77-91.e7. doi:10.1016/j.cels.2018.05.019.
- 764 [15] K.A. Pillman, K.G. Scheer, E. Hackett-Jones, K. Saunders, A.G. Bert, J. Toubia,  
765 H.J. Whitfield, S. Sapkota, L. Sourdin, H. Pham, T.D. Le, J. Cursons, M.J. Davis,  
766 P.A. Gregory, G.J. Goodall, C.P. Bracken, Extensive transcriptional responses are  
767 co-ordinated by microRNAs as revealed by Exon–Intron Split Analysis (EISA),  
768 *Nucleic Acids Res.* 47 (2019) 8606-8619. doi:10.1093/nar/gkz664.
- 769 [16] D. Pérez-Montarelo, A. Fernández, C. Barragán, J.L. Noguera, J.M. Folch, M.C.  
770 Rodríguez, C. Óvilo, L. Silió, A.I. Fernández, Transcriptional characterization of  
771 porcine leptin and leptin receptor genes, *PLoS One.* 8 (2013) e66398.  
772 doi:10.1371/journal.pone.0066398.
- 773 [17] C. Ovilo, R. Benítez, A. Fernández, Y. Núñez, M. Ayuso, A.I. Fernández, C.  
774 Rodríguez, B. Isabel, A.I. Rey, C. López-Bote, L. Silió, Longissimus dorsi  
775 transcriptome analysis of purebred and crossbred Iberian pigs differing in muscle  
776 characteristics., *BMC Genomics.* 15 (2014) 413. doi:10.1186/1471-2164-15-413.

- 777 [18] A. Puig-Oliveras, Y. Ramayo-Caldas, J. Corominas, J. Estellé, D. Pérez-  
778 Montarelo, N.J. Hudson, J. Casellas, J.M. Folch, M. Ballester, Differences in  
779 muscle transcriptome among pigs phenotypically extreme for fatty acid  
780 composition., *PLoS One*. 9 (2014) e99720. doi:10.1371/journal.pone.0099720.
- 781 [19] C.M. Pilcher, C.K. Jones, M. Schroyen, A.J. Severin, J.F. Patience, C.K. Tuggle,  
782 J.E. Koltés, Transcript profiles in longissimus dorsi muscle and subcutaneous  
783 adipose tissue: A comparison of pigs with different postweaning growth rates, *J.*  
784 *Anim. Sci.* 93 (2015) 2134–2143. doi:10.2527/jas.2014-8593.
- 785 [20] M. Ayuso, A. Fernández, Y. Núñez, R. Benítez, B. Isabel, A.I. Fernández, A.I.  
786 Rey, A. González-Bulnes, J.F. Medrano, Á. Cánovas, C.J. López-Bote, C. Óvilo,  
787 Developmental stage, muscle and genetic type modify muscle transcriptome in  
788 pigs: Effects on gene expression and regulatory factors involved in growth and  
789 metabolism, *PLoS One*. 11 (2016) e0167858. doi:10.1371/journal.pone.0167858.
- 790 [21] T.F. Cardoso, A. Cánovas, O. Canela-Xandri, R. González-Prendes, M. Amills, R.  
791 Quintanilla, RNA-seq based detection of differentially expressed genes in the  
792 skeletal muscle of Duroc pigs with distinct lipid profiles, *Sci. Rep.* 7 (2017) 40005.  
793 doi:10.1038/srep40005.
- 794 [22] T.F. Cardoso, R. Quintanilla, J. Tibau, M. Gil, E. Mármol-Sánchez, O. González-  
795 Rodríguez, R. González-Prendes, M. Amills, Nutrient supply affects the mRNA  
796 expression profile of the porcine skeletal muscle, *BMC Genomics*. 18 (2017) 603.  
797 doi:10.1186/s12864-017-3986-x.
- 798 [23] J. Horodyska, K. Wimmers, H. Reyer, N. Trakooljul, A.M. Mullen, P.G. Lawlor,  
799 R.M. Hamill, RNA-seq of muscle from pigs divergent in feed efficiency and  
800 product quality identifies differences in immune response, growth, and  
801 macronutrient and connective tissue metabolism, *BMC Genomics*. 19 (2018) 791.

- 802           doi:10.1186/s12864-018-5175-y.
- 803   [24]   R. Benítez, N. Trakooljul, Y. Núñez, B. Isabel, E. Murani, E. De Mercado, E.  
804           Gómez-Izquierdo, J. García-Casco, C. López-Bote, K. Wimmers, C. Óvilo, Breed,  
805           diet, and interaction effects on adipose tissue transcriptome in iberian and duroc  
806           pigs fed different energy sources, *Genes*. 10 (2019) 589.  
807           doi:10.3390/genes10080589.
- 808   [25]   M. Ballester, M. Amills, O. González-Rodríguez, T.F. Cardoso, M. Pascual, R.  
809           González-Prendes, N. Panella-Riera, I. Díaz, J. Tibau, R. Quintanilla, Role of  
810           AMPK signalling pathway during compensatory growth in pigs, *BMC Genomics*.  
811           19 (2018) 682. doi:10.1186/s12864-018-5071-5.
- 812   [26]   L.J.A. Kogelman, H.N. Kadarmideen, T. Mark, P. Karlskov-Mortensen, C.S.  
813           Bruun, S. Cirera, M.J. Jacobsen, C.B. Jørgensen, M. Fredholm, An F2 pig resource  
814           population as a model for genetic studies of obesity and obesity-related diseases in  
815           humans: Design and genetic parameters, *Front. Genet.* 4 (2013) 29.  
816           doi:10.3389/fgene.2013.00029.
- 817   [27]   S.D. Pant, P. Karlskov-Mortensen, M.J. Jacobsen, S. Cirera, L.J.A. Kogelman,  
818           C.S. Bruun, T. Mark, C.B. Jørgensen, N. Grarup, E.V.R. Appel, E.A.A. Galjatovic,  
819           T. Hansen, O. Pedersen, M. Guerin, T. Huby, P. Lesnik, T.H.E. Meuwissen, H.N.  
820           Kadarmideen, M. Fredholm, Comparative analyses of QTLs influencing obesity  
821           and metabolic phenotypes in pigs and humans, *PLoS One*. 10 (2015) e0137356.  
822           doi:10.1371/journal.pone.0137356.
- 823   [28]   M.J. Jacobsen, J.H. Havgaard, C. Anthon, C.M.J. Mentzel, S. Cirera, P.M. Krogh,  
824           S. Pundhir, P. Karlskov-Mortensen, C.S. Bruun, P. Lesnik, M. Guerin, J. Gorodkin,  
825           C.B. Jørgensen, M. Fredholm, R. Barrès, Epigenetic and transcriptomic  
826           characterization of pure adipocyte fractions from obese pigs identifies candidate

- 827 pathways controlling metabolism, *Front. Genet.* 10 (2019) 1268.  
828 doi:10.3389/fgene.2019.01268.
- 829 [29] P. Decaunes, D. Estève, A. Zakaroff-Girard, C. Sengenès, J. Galitzky, A.  
830 Bouloumié, Adipose-derived stromal cells: cytokine expression and immune cell  
831 contaminants., *Methods Mol. Biol.* 702 (2011) 151–161. doi:10.1007/978-1-  
832 61737-960-4\_12.
- 833 [30] M. Martin, Cutadapt removes adapter sequences from high-throughput sequencing  
834 reads, *EMBnet.Journal.* 17 (2011) 10. doi:10.14806/ej.17.1.200.
- 835 [31] A. Warr, N. Affara, B. Aken, H. Beiki, D.M. Bickhart, K. Billis, W. Chow, L.  
836 Eory, H.A. Finlayson, P. Flicek, C.G. Girón, D.K. Griffin, R. Hall, G. Hannum, T.  
837 Hourlier, K. Howe, D.A. Hume, O. Izuogu, K. Kim, S. Koren, H. Liu, N.  
838 Manchanda, F.J. Martin, D.J. Nonneman, R.E. O’Connor, A.M. Phillippy, G.A.  
839 Rohrer, B.D. Rosen, L.A. Rund, C.A. Sargent, L.B. Schook, S.G. Schroeder, A.S.  
840 Schwartz, B.M. Skinner, R. Talbot, E. Tseng, C.K. Tuggle, M. Watson, T.P.L.  
841 Smith, A.L. Archibald, An improved pig reference genome sequence to enable pig  
842 genetics and genomics research, *Gigascience.* 9 (2020) 1–14.  
843 doi:10.1093/gigascience/giaa051.
- 844 [32] D. Kim, J.M. Paggi, C. Park, C. Bennett, S.L. Salzberg, Graph-based genome  
845 alignment and genotyping with HISAT2 and HISAT-genotype, *Nat. Biotechnol.*  
846 37 (2019) 907–915. doi:10.1038/s41587-019-0201-4.
- 847 [33] B. Langmead, C. Trapnell, M. Pop, S.L. Salzberg, Ultrafast and memory-efficient  
848 alignment of short DNA sequences to the human genome, *Genome Biol.* 10 (2009)  
849 R25. doi:10.1186/gb-2009-10-3-r25.
- 850 [34] M. Lawrence, W. Huber, H. Pagès, P. Aboyoun, M. Carlson, R. Gentleman, M.T.  
851 Morgan, V.J. Carey, Software for computing and annotating genomic ranges,

- 852 PLoS Comput. Biol. 9 (2013) e1003118. doi:10.1371/journal.pcbi.1003118.
- 853 [35] Y. Liao, G.K. Smyth, W. Shi, The R package Rsubread is easier, faster, cheaper  
854 and better for alignment and quantification of RNA sequencing reads, *Nucleic  
855 Acids Res.* 47 (2019) e47–e47. doi:10.1093/nar/gkz114.
- 856 [36] Y. Liao, G.K. Smyth, W. Shi, featureCounts: an efficient general purpose program  
857 for assigning sequence reads to genomic features, *Bioinformatics.* 30 (2014) 923–  
858 930. doi:10.1093/bioinformatics/btt656.
- 859 [37] M.D. Robinson, D.J. McCarthy, G.K. Smyth, edgeR: a Bioconductor package for  
860 differential expression analysis of digital gene expression data., *Bioinformatics.* 26  
861 (2010) 139–40. doi:10.1093/bioinformatics/btp616.
- 862 [38] M.D. Robinson, A. Oshlack, A scaling normalization method for differential  
863 expression analysis of RNA-seq data, *Genome Biol.* 11 (2010) R25.  
864 doi:10.1186/gb-2010-11-3-r25.
- 865 [39] Y. Benjamini, Y. Hochberg, Controlling the false discovery rate: a practical and  
866 powerful approach to multiple testing, *J. R. Stat. Soc. Ser. B.* 57 (1995) 289–300.  
867 doi:10.2307/2346101.
- 868 [40] Y. Guo, J. Liu, S.J. Elfenbein, Y. Ma, M. Zhong, C. Qiu, Y. Ding, J. Lu,  
869 Characterization of the mammalian miRNA turnover landscape, *Nucleic Acids  
870 Res.* 43 (2015) 2326–2341. doi:10.1093/nar/gkv057
- 871 [41] A. Kozomara, M. Birgaoanu, S. Griffiths-Jones, MiRBase: From microRNA  
872 sequences to function, *Nucleic Acids Res.* 47 (2019) D155–D162.  
873 doi:10.1093/nar/gky1141.
- 874 [42] A. Marco, SeedVicious: Analysis of microRNA target and near-target sites, *PLoS  
875 One.* 13 (2018) e0195532. doi:10.1371/journal.pone.0195532.
- 876 [43] A. Grimson, K.K.H. Farh, W.K. Johnston, P. Garrett-Engele, L.P. Lim, D.P.

- 877 Bartel, MicroRNA targeting specificity in mammals: determinants beyond seed  
878 pairing, *Mol. Cell.* 27 (2007) 91–105. doi:10.1016/j.molcel.2007.06.017.
- 879 [44] R.C. Friedman, K.K.H. Farh, C.B. Burge, D.P. Bartel, Most mammalian mRNAs  
880 are conserved targets of microRNAs, *Genome Res.* 19 (2009) 92–105.  
881 doi:10.1101/gr.082701.108.
- 882 [45] A. Reverter, E.K.F. Chan, Combining partial correlation and an information theory  
883 approach to the reversed engineering of gene co-expression networks,  
884 *Bioinformatics.* 24 (2008) 2491–2497. doi:10.1093/bioinformatics/btn482.
- 885 [46] N.S. Watson-Haigh, H.N. Kadarmideen, A. Reverter, PCIT: an R package for  
886 weighted gene co-expression networks based on partial correlation and  
887 information theory approaches, *Bioinformatics.* 26 (2010) 411–413.  
888 doi:10.1093/bioinformatics/btp674.
- 889 [47] M. Tarbier, S.D. Mackowiak, J. Frade, S. Catuara-Solarz, I. Biryukova, E. Gelali,  
890 D.B. Menéndez, L. Zapata, S. Ossowski, M. Bienko, C.J. Gallant, M.R.  
891 Friedländer, Nuclear gene proximity and protein interactions shape transcript  
892 covariations in mammalian single cells, *Nat. Commun.* 11 (2020) 5445.  
893 doi:10.1038/s41467-020-19011-5.
- 894 [48] H.B. Mann, D.R. Whitney, On a test of whether one of two random variables is  
895 stochastically larger than the other, *Ann. Math. Stat.* 18 (1947) 50–60.  
896 doi:10.1214/aoms/1177730491.
- 897 [49] A.B. Nygard, C.B. Jørgensen, S. Cirera, M. Fredholm, Selection of reference genes  
898 for gene expression studies in pig tissues using SYBR green qPCR, *BMC Mol.*  
899 *Biol.* 8 (2007) 67. doi:10.1186/1471-2199-8-67.
- 900 [50] L.J. Core, J.J. Waterfall, J.T. Lis, Nascent RNA sequencing reveals widespread  
901 pausing and divergent initiation at human promoters, *Science.* 322 (2008) 1845–

- 902 1848. doi:10.1126/science.1162228.
- 903 [51] D.B. Mahat, H. Kwak, G.T. Booth, I.H. Jonkers, C.G. Danko, R.K. Patel, C.T.  
904 Waters, K. Munson, L.J. Core, J.T. Lis, Base-pair resolution genome-wide  
905 mapping of active RNA polymerases using precision nuclear run-on (PRO-seq),  
906 Nat. Protoc. 11 (2016) 1455. doi:10.1038/nprot.2016.086.
- 907 [52] A. Blumberg, Y. Zhao, Y.-F. Huang, N. Dukler, E.J. Rice, A.G. Chivu, K.  
908 Krumholz, C.G. Danko, A. Siepel, Characterizing RNA stability genome-wide  
909 through combined analysis of PRO-seq and RNA-seq data, BMC Biol. 19 (2021)  
910 30. doi:10.1186/s12915-021-00949-x.
- 911 [53] R.K. Patel, J.D. West, Y. Jiang, E.A. Fogarty, A. Grimson, Robust partitioning of  
912 microRNA targets from downstream regulatory changes, Nucleic Acids Res. 48  
913 (2020) 9724–9746. doi:10.1093/nar/gkaa687.
- 914 [54] E.M. Wissink, A. Vihervaara, N.D. Tippens, J.T. Lis, Nascent RNA analyses:  
915 tracking transcription and its regulation, Nat. Rev. Gen. 20 (2019) 705-723.  
916 doi:10.1038/s41576-019-0159-6.
- 917 [55] R. Denzler, S.E. McGeary, A.C. Title, V. Agarwal, D.P. Bartel, M. Stoffel, Impact  
918 of microRNA levels, target-site complementarity, and cooperativity on competing  
919 endogenous RNA-regulated gene expression, Mol. Cell. 64 (2016) 565-579.  
920 doi:10.1016/j.molcel.2016.09.027.
- 921 [56] S.E. McGeary, K.S. Lin, C.Y. Shi, T.M. Pham, N. Bisaria, G.M. Kelley, D.P.  
922 Bartel, The biochemical basis of microRNA targeting efficacy, Science. 366  
923 (2019) eaav1741. doi:10.1126/science.aav1741.
- 924 [57] R.Z. He, D.X. Luo, Y.Y. Mo, Emerging roles of lncRNAs in the post-  
925 transcriptional regulation in cancer, Genes Dis. 6 (2019) 6–15.  
926 doi:10.1016/j.gendis.2019.01.003.

- 927 [58] S. Memczak, M. Jens, A. Elefsinioti, F. Torti, J. Krueger, A. Rybak, L. Maier, S.D.  
928 Mackowiak, L.H. Gregersen, M. Munschauer, A. Loewer, U. Ziebold, M.  
929 Lanthaler, C. Kocks, F. le Noble, N. Rajewsky, Circular RNAs are a large class of  
930 animal RNAs with regulatory potency, *Nature*. 495 (2013) 333–338.  
931 doi:10.1038/nature11928.
- 932 [59] P.G. Maass, P. Glažar, S. Memczak, G. Dittmar, I. Hollfinger, L. Schreyer, A.V.  
933 Sauer, O. Toka, A. Aiuti, F.C. Luft, N. Rajewsky, A map of human circular RNAs  
934 in clinically relevant tissues, *J. Mol. Med. (Berl)*. 95 (2017) 1179–1189.  
935 doi:10.1007/S00109-017-1582-9.
- 936 [60] B.S. Zhao, I.A. Roundtree, C. He, Post-transcriptional gene regulation by mRNA  
937 modifications, *Nat. Rev. Mol. Cell Biol.* 18 (2017) 31. doi:10.1038/nrm.2016.132.
- 938 [61] T. Glisovic, J.L. Bachorik, J. Yong, G. Dreyfuss, RNA-binding proteins and post-  
939 transcriptional gene regulation, *FEBS Lett.* 582 (2008) 1977–1986.  
940 doi:10.1016/j.febslet.2008.03.004.
- 941 [62] M.W. Hentze, A. Castello, T. Schwarzl, T. Preiss, A brave new world of RNA-  
942 binding proteins, *Nat. Rev. Mol. Cell Biol.* 19 (2018) 327–341.  
943 doi:10.1038/nrm.2017.130.
- 944 [63] A. Velázquez-Cruz, B. Baños-Jaime, A. Díaz-Quintana, M.A.D. la Rosa, I. Díaz-  
945 Moreno, Post-translational control of RNA-binding proteins and disease-related  
946 dysregulation, *Front. Mol. Biosci.* 8 (2021) 658852.  
947 doi:10.3389/fmolb.2021.658852.
- 948 [64] X. Li, J. Shan, W. Chang, I. Kim, J. Bao, H.-J. Lee, X. Zhang, V.T. Samuel, G.I.  
949 Shulman, D. Liu, J.J. Zheng, D. Wu, Chemical and genetic evidence for the  
950 involvement of Wnt antagonist Dickkopf2 in regulation of glucose metabolism,  
951 *Proc. Natl. Acad. Sci.* 109 (2012) 11402–11407. doi:10.1073/pnas.1205015109.



- 952 [65] J. Yang, B. Yin Shi, Dickkopf (Dkk)-2 is a beige fat-enriched adipokine to regulate  
953 adipogenesis, *Biochem. Biophys. Res. Commun.* 548 (2021) 211–216.  
954 doi:10.1016/j.bbrc.2021.02.068.
- 955 [66] F. Deng, R. Zhou, C. Lin, S. Yang, H. Wang, W. Li, K. Zheng, W. Lin, X. Li, X.  
956 Yao, M. Pan, L. Zhao, Tumor-secreted dickkopf2 accelerates aerobic glycolysis  
957 and promotes angiogenesis in colorectal cancer, *Theranostics*. 9 (2019) 1001-1014.  
958 doi:10.7150/thno.30056.
- 959 [67] J.Y. Jeong, N.H. Jeoung, K.-G. Park, I.-K. Lee, Transcriptional regulation of  
960 pyruvate dehydrogenase kinase, *Diabetes Metab. J.* 36 (2012) 328–35.  
961 doi:10.4093/dmj.2012.36.5.328.
- 962 [68] S. Zhang, M.W. Hulver, R.P. McMillan, M.A. Cline, E.R. Gilbert, The pivotal role  
963 of pyruvate dehydrogenase kinases in metabolic flexibility, *Nutr. Metab.* 11 (2014)  
964 10. doi:10.1186/1743-7075-11-10.
- 965 [69] B. Lindgaard, V.B. Mathews, C. Brandt, P. Hojman, T.L. Allen, E. Estevez, M.J.  
966 Watt, C.R. Bruce, O.H. Mortensen, S. Syberg, C. Rudnika, J. Abildgaard, H.  
967 Pilegaard, J. Hidalgo, S. Ditlevsen, T.J. Alsted, A.N. Madsen, B.K. Pedersen, M.A.  
968 Febbraio, Interleukin-18 activates skeletal muscle AMPK and reduces weight gain  
969 and insulin resistance in mice, *Diabetes*. 62 (2013) 3064–3074. doi:10.2337/DB12-  
970 1095.
- 971 [70] P. Jiang, L. Ren, L. Zhi, Z. Yu, F. Lv, F. Xu, W. Peng, X. Bai, K. Cheng, L. Quang,  
972 X. Zhang, X. Wang, Y. Zhang, D. Yang, X. Hu, R.P. Xiao, Negative regulation of  
973 AMPK signaling by high glucose via E3 ubiquitin ligase MG53, *Mol. Cell.* 81  
974 (2021) 629-637.e5. doi:10.1016/j.molcel.2020.12.008.
- 975 [71] C. Zhang, B. Zhang, X. Zhang, G. Sun, X. Sun, Targeting orphan nuclear receptors  
976 NR4As for energy homeostasis and diabetes, *Front. Pharmacol.* 11 (2020) 587457.

- 977 doi:10.3389/fphar.2020.587457.
- 978 [72] M.A. Pearen, J.M. Goode, R.L. Fitzsimmons, N.A. Eriksson, G.P. Thomas, G.J.  
979 Cowin, S.C. Wang, Z.K. Tuong, G.E. Muscat, Transgenic muscle-specific Nor-1  
980 expression regulates multiple pathways that effect adiposity, metabolism, and  
981 endurance, *Mol. Endocrinol.* 27 (2013) 1897–1917. doi:10.1210/me.2013-1205.
- 982 [73] S. Xu, H. Ni, H. Chen, Q. Dai, The interaction between STAT3 and nAChR $\alpha$ 1  
983 interferes with nicotine-induced atherosclerosis via Akt/mTOR signaling cascade,  
984 *Aging.* 11 (2019) 8120–8138. doi:10.18632/aging.102296.
- 985 [74] L. Zhang, Z. Chen, Y. Wang, D.J. Tweardy, W.E. Mitch, Stat3 activation induces  
986 insulin resistance via a muscle-specific E3 ubiquitin ligase Fbxo40, *Am. J. Physiol.*  
987 *Endocrinol. Metab.* 318 (2020) E625–E635. doi:10.1152/ajpendo.00480.2019.
- 988 [75] M.C. Monteiro, M. Sanyal, M.L. Cleary, C. Sengenès, A. Bouloumié, C. Dani, N.  
989 Billon, PBX1: a novel stage-specific regulator of adipocyte development, *Stem*  
990 *Cells.* 29 (2011) 1837–1848. doi:10.1002/stem.737.
- 991 [76] D. Wu, D. Hu, H. Chen, G. Shi, I.S. Fetahu, F. Wu, K. Rabidou, R. Fang, L. Tan,  
992 S. Xu, H. Liu, C. Argueta, L. Zhang, F. Mao, G. Yan, J. Chen, Z. Dong, R. Lv, Y.  
993 Xu, M. Wang, Y. Ye, S. Zhang, D. Duquette, S. Geng, C. Yin, C.G. Lian, G.F.  
994 Murphy, G.K. Adler, R. Garg, L. Lynch, P. Yang, Y. Li, F. Lan, J. Fan, Y. Shi,  
995 Y.G. Shi, Glucose-regulated phosphorylation of TET2 by AMPK reveals a  
996 pathway linking diabetes to cancer, *Nature.* 559 (2018) 637–641.  
997 doi:10.1038/s41586-018-0350-5.
- 998 [77] T. Tamahara, K. Ochiai, A. Muto, Y. Kato, N. Sax, M. Matsumoto, T. Koseki, K.  
999 Igarashi, The mTOR-Bach2 cascade controls cell cycle and class switch  
1000 recombination during B cell differentiation, *Mol. Cell. Biol.* 37 (2017) e00418-17.  
1001 doi:10.1128/mcb.00418-17.

- 1002 [78] G. Leprivier, B. Rotblat, How does mTOR sense glucose starvation? AMPK is the  
1003 usual suspect, *Cell Death Discov.* 6 (2020) 27. doi:10.1038/S41420-020-0260-9.
- 1004 [79] A. Itoh-Nakadai, M. Matsumoto, H. Kato, J. Sasaki, Y. Uehara, Y. Sato, R. Ebina-  
1005 Shibuya, M. Morooka, R. Funayama, K. Nakayama, K. Ochiai, A. Muto, K.  
1006 Igarashi, A Bach2-Cebp gene regulatory network for the commitment of  
1007 multipotent hematopoietic progenitors, *Cell Rep.* 18 (2017) 2401–2414.  
1008 doi:10.1016/j.celrep.2017.02.029.
- 1009 [80] K. Gopal, B. Saleme, R. Al Batran, H. Aburasayn, A. Eshreif, K.L. Ho, W.K. Ma,  
1010 M. Almutairi, F. Eaton, M. Gandhi, E.A. Park, G. Sutendra, J.R. Ussher, FoxO1  
1011 regulates myocardial glucose oxidation rates via transcriptional control of pyruvate  
1012 dehydrogenase kinase 4 expression, *Am. J. Physiol. Circ. Physiol.* 313 (2017)  
1013 H479–H490. doi:10.1152/ajpheart.00191.2017.
- 1014 [81] M. Kubo, N. Ijichi, K. Ikeda, K. Horie-Inoue, S. Takeda, S. Inoue, Modulation of  
1015 adipogenesis-related gene expression by estrogen-related receptor  $\gamma$  during  
1016 adipocytic differentiation, *Biochim. Biophys. Acta - Gene Regul. Mech.* 1789  
1017 (2009) 71–77. doi:10.1016/j.bbgram.2008.08.012.
- 1018 [82] X. Huang, G. Liu, J. Guo, Z. Su, The PI3K/AKT pathway in obesity and type 2  
1019 diabetes, *Int. J. Biol. Sci.* 14 (2018) 1483. doi:10.7150/ijbs.27173.
- 1020 [83] R. Tao, X. Xiong, S. Liangpunsakul, X.C. Dong, Sestrin 3 protein enhances hepatic  
1021 insulin sensitivity by direct activation of the mTORC2-Akt signaling, *Diabetes.* 64  
1022 (2015) 1211–1223. doi:10.2337/db14-0539.
- 1023 [84] Z. Chen, W. Holland, J.M. Shelton, A. Ali, X. Zhan, S. Won, W. Tomisato, C. Liu,  
1024 X. Li, E.M.Y. Moresco, B. Beutler, Mutation of mouse *Samd4* causes leanness,  
1025 myopathy, uncoupled mitochondrial respiration, and dysregulated mTORC1  
1026 signaling, *Proc. Natl. Acad. Sci.* 111 (2014) 7367–7372.

- 1027 doi:10.1073/pnas.1406511111.
- 1028 [85] Y. Liu, H. Liu, Y. Li, R. Mao, H. Yang, Y. Zhang, Y. Zhang, P. Guo, D. Zhan, T.  
1029 Zhang, Circular RNA *SAMD4A* controls adipogenesis in obesity through the miR-  
1030 138-5p/EZH2 axis, *Theranostics*. 10 (2020) 4705–4719. doi:10.7150/thno.42417.
- 1031 [86] B. Xiao, S.M. Gu, M.J. Li, J. Li, B. Tao, Y. Wang, Y. Wang, S. Zuo, Y. Shen, Y.  
1032 Yu, D. Chen, G. Chen, D. Kong, J. Tang, Q. Liu, D.R. Cheng, Y. Liu, S. Alberti,  
1033 M. Dovizio, R. Landolfi, L. Mucci, P.-Z. Miao, P. Gao, D.-L. Zhu, J. Wang, B. Li,  
1034 P. Patrignani, Y. Yu, Rare SNP rs12731181 in the miR-590-3p target site of the  
1035 Prostaglandin F<sub>2</sub> $\alpha$  receptor gene confers risk for essential hypertension in the Han  
1036 Chinese population, *Arterioscler. Thromb. Vasc. Biol.* 35 (2015) 1687–1695.  
1037 doi:10.1161/atvbaha.115.305445.
- 1038 [87] Y. Wang, S. Yan, B. Xiao, S. Zuo, Q. Zhang, G. Chen, Y. Yu, D. Chen, Q. Liu, Y.  
1039 Liu, Y. Shen, Y. Yu, Prostaglandin F<sub>2</sub> $\alpha$  facilitates hepatic glucose production  
1040 through CaMKII $\gamma$ /p38/FOXO1 signaling pathway in fasting and obesity, *Diabetes*.  
1041 67 (2018) 1748–1760. doi:10.2337/db17-1521.
- 1042 [88] P. Kaur, M.D. Reis, G.R. Couchman, S.N. Forjuoh, J.F. Greene, Jr, A. Asea,  
1043 SERPINE 1 links obesity and diabetes: a pilot study, *J. Proteomics Bioinform.* 3  
1044 (2010) 191. doi:10.4172/jpb.1000139.
- 1045 [89] G.M. Coudriet, J. Stoops, A.V. Orr, B. Bhushan, K. Koral, S. Lee, D.M. Previte,  
1046 H.H. Dong, G.K. Michalopoulos, W.M. Mars, J.D. Piganelli, A Noncanonical role  
1047 for plasminogen activator inhibitor type 1 in obesity-induced diabetes, *Am. J.*  
1048 *Pathol.* 189 (2019) 1413–1422. doi:10.1016/j.ajpath.2019.04.004.
- 1049 [90] C.-S. Kuo, J.-S. Chen, L.-Y. Lin, G.W. Schmid-Schönbein, S. Chien, P.-H. Huang,  
1050 J.-W. Chen, S.-J. Lin, Inhibition of serine protease activity protects against high  
1051 fat diet-induced inflammation and insulin resistance, *Sci. Reports*. 10 (2020) 1–11.

- 1052 doi:10.1038/s41598-020-58361-4.
- 1053 [91] J. Kosacka, M. Nowicki, S. Paeschke, P. Baum, M. Blüher, N. Klö ting, Up-  
1054 regulated autophagy: as a protective factor in adipose tissue of WOKW rats with  
1055 metabolic syndrome, *Diabetol. Metab. Syndr.* 10 (2018) 13. doi:10.1186/S13098-  
1056 018-0317-6.
- 1057 [92] J. Perttilä, K. Merikanto, J. Naukkarinen, I. Surakka, N.W. Martin, K. Tanhuanpää,  
1058 V. Grimard, M.-R. Taskinen, C. Thiele, V. Salomaa, A. Jula, M. Perola, I.  
1059 Virtanen, L. Peltonen, V.M. Oikonen, OSBPL10, a novel candidate gene for high  
1060 triglyceride trait in dyslipidemic Finnish subjects, regulates cellular lipid  
1061 metabolism, *J. Mol. Med.* 2009 878. 87 (2009) 825–835. doi:10.1007/S00109-009-  
1062 0490-Z.
- 1063 [93] R.F. Bowen, N.S. Raikwar, L.K. Olson, M.A. Deeg, Glucose and insulin regulate  
1064 glycosylphosphatidylinositol-specific phospholipase D expression in islet beta  
1065 cells, *Metabolism.* 50 (2001) 1489–1492. doi:10.1053/meta.2001.28087.
- 1066 [94] S. Ussar, O. Bezy, M. Blüher, C.R. Kahn, Glypican-4 enhances insulin signaling  
1067 via interaction with the insulin receptor and serves as a novel adipokine, *Diabetes.*  
1068 61 (2012) 2289–2298. doi:10.2337/db11-1395.
- 1069 [95] J. Xu, X. Bao, Z. Peng, L. Wang, L. Du, W. Niu, Y. Sun, Comprehensive analysis  
1070 of genome-wide DNA methylation across human polycystic ovary syndrome ovary  
1071 granulosa cell, *Oncotarget.* 7 (2016) 27899. doi:10.18632/oncotarget.8544.
- 1072 [96] F. Yeung, C.M. Ramírez, P.A. Mateos-Gomez, A. Pinzaro, G. Ceccarini, S. Kabir,  
1073 C. Fernández-Hernando, A. Sfeir, Nontelomeric role for Rap1 in regulating  
1074 metabolism and protecting against obesity, *Cell Rep.* 3 (2013) 1847–1856.  
1075 doi:10.1016/j.celrep.2013.05.032.
- 1076 [97] P. Martínez, G. Gómez-López, F. García, E. Mercken, S. Mitchell, J.M. Flores, R.

- 1077 de Cabo, M.A. Blasco, RAP1 protects from obesity through its extratelomeric role  
1078 regulating gene expression, *Cell Rep.* 3 (2013) 2059–2074.  
1079 doi:10.1016/j.celrep.2013.05.030.
- 1080 [98] W. Yang, T. Kelly, J. He, Genetic epidemiology of obesity, *Epidemiol. Rev.* 29  
1081 (2007) 49–61. doi:10.1093/epirev/mxm004.
- 1082 [99] Y. Zhou, L. Rui, Leptin signaling and leptin resistance, *Front. Med.* 7 (2013) 207–  
1083 222. doi:10.1007/s11684-013-0263-5.
- 1084 [100] A.G. Izquierdo, A.B. Crujeiras, F.F. Casanueva, M.C. Carreira, Leptin, obesity,  
1085 and leptin resistance: where are we 25 years later?, *Nutrients.* 11 (2019) 2704.  
1086 doi:10.3390/nu11112704.

1087

1088

## 1089 **Supplementary Tables**

1090 **Table S1:** Phenotype values for selected Duroc-Göttingen minipigs from the F2-UNIK  
1091 resource population according to their body mass indexes.

1092

1093 **Table S2:** Primers for qPCR validation of selected mRNA and miRNA genes according  
1094 to EISA results in the F2-UNIK Duroc-Göttingen minipig population comparing *lean* (N  
1095 = 5) and *obese* (N = 5) individuals.

1096

1097 **Table S3:** Raw Cq values from qPCR analyses after efficiency correction measuring  
1098 adipocyte expression profiles of selected mRNAs and miRNAs from *lean* (N = 5) and  
1099 *obese* (N = 5) Duroc-Göttingen minipigs.

1100

1101 **Table S4:** Genes detected by *edgeR* tool as differentially expressed when comparing  
1102 *gluteus medius* expression profiles of fasted *AL-T0* (N = 11) and fed *AL-T2* (N = 12)  
1103 Duroc gilts.

1104

1105 **Table S5:** microRNAs detected by *edgeR* tool as differentially expressed when  
1106 comparing *gluteus medius* expression profiles of fasted *AL-T0* (N = 11) and fed *AL-T2*  
1107 (N = 12) Duroc gilts.

1108

1109 **Table S6:** EISA results for post-transcriptional signals (PT<sub>c</sub>) detected in *gluteus medius*  
1110 skeletal muscle expression profiles of fasted (*AL-T0*, N = 11) and fed (*AL-T2*, N = 12)  
1111 Duroc gilts.

1112

1113 **Table S7:** Binding sites for differentially upregulated miRNAs found in mRNA genes  
1114 with the top 5% negative PT<sub>c</sub> scores and at least 2-folds reduction in the exonic fraction  
1115 ( $\Delta$ Ex) of *gluteus medius* skeletal muscle expression profiles from fasting (*AL-T0*, N = 11)  
1116 and fed (*AL-T2*, N = 12) Duroc gilts.

1117

1118 **Table S8:** Covariation enrichment scores (CES) for the exonic and intronic fractions of  
1119 mRNA genes with the top 5% negative post-transcriptional signals (PT<sub>c</sub>) and at least 2-  
1120 folds reduction in their exonic ( $\Delta$ Ex) fraction, that were putatively targeted by DE  
1121 upregulated miRNAs from *gluteus medius* skeletal muscle expression profiles *AL-T0* vs  
1122 *AL-T2* Duroc gilts.

1123

1124 **Table S9:** Genes detected by *edgeR* tool as differentially expressed when comparing  
1125 adipocyte expression profiles from *lean* (N = 5) and *obese* (N = 5) Duroc-Göttingen  
1126 minipigs according to their body mass index.

1127

1128 **Table S10:** microRNA genes detected by *edgeR* tool as differentially expressed when  
1129 comparing adipocyte expression profiles from *lean* (N = 5) and *obese* (N = 5) Duroc-  
1130 Göttingen minipigs according to their body mass index.

1131

1132 **Table S11:** mRNA genes with the top 5% post-transcriptional signals (PTc) and at least  
1133 2-fold exonic fraction ( $\Delta\text{Ex}$ ) reduction (equivalent to -1 in the log<sub>2</sub> scale) from adipocyte  
1134 expression profiles of *lean* (N = 5) and *obese* (N = 5) Duroc-Göttingen minipigs according  
1135 to their body mass index.

1136

1137 **Table S12:** EISA results for post-transcriptional signals (PTc) detected in adipocyte  
1138 expression profiles of *lean* (N = 5) and *obese* (N = 5) Duroc-Göttingen minipigs according  
1139 to their body mass index.

1140

1141 **Table S13:** Binding sites for differentially upregulated miRNAs found in mRNA genes  
1142 with the top 5% negative PTc scores and at least 2-folds reduction in the exonic fraction  
1143 ( $\Delta\text{Ex}$ ) of adipocyte expression profiles from *lean* (N = 5) and *obese* (N = 5) Duroc-  
1144 Göttingen minipigs according to their body mass index.

1145

1146 **Table S14:** Covariation enrichment scores (CES) for the exonic and intronic fractions of  
1147 mRNA genes with the top 5% negative post-transcriptional signals (PTc) and at least 2-  
1148 folds reduction in their exonic ( $\Delta\text{Ex}$ ) fraction, that were putatively targeted by DE



1149 upregulated miRNAs from adipocyte expression profiles of *lean vs obese* Duroc-  
1150 Göttingen minipigs.

1151

1152

## 1153 **Supplementary Figures**

1154 **Figure S1:** Diagram depicting the consecutive steps implemented for studying miRNA-  
1155 driven post-transcriptional regulatory signals applying the EISA approach and additional  
1156 enrichment and covariation analyses.

1157

1158 **Figure S2:** Scatterplots depicting the exonic ( $\Delta\text{Ex}$ ) and intronic ( $\Delta\text{Int}$ ) fractions from  
1159 *gluteus medius* skeletal muscle expression profiles of fasting (*AL-T0*, N = 11) and fed  
1160 (*AL-T2*, N = 12) Duroc gilts. **(A)** mRNA genes with the top 5% post-transcriptional (PTc)  
1161 negative scores and at least 2-folds reduced exonic ( $\Delta\text{Ex}$ ) fractions (equivalent to -1 in  
1162 the  $\log_2$  scale), suggestive of miRNA-driven post-transcriptional regulation. **(B)** mRNA  
1163 genes differentially expressed showing upregulation ( $\text{FC} > 2$ ;  $q\text{-value} < 0.05$ , in green)  
1164 and downregulation ( $\text{FC} < -2$ ,  $q\text{-value} < 0.05$ , in red) in fed (*AL-T2*, N = 12) Duroc gilts  
1165 with respect to their fasted (*AL-T0*, N = 11) counterparts.

1166

1167 **Figure S3:** Enrichment analyses of the number of genes with the **(A)** top 1% and **(B)** top  
1168 5% negative PTc scores and at least 2-fold reduced exonic fractions ( $\Delta\text{Ex}$ ) putatively  
1169 targeted by upregulated miRNAs ( $\text{FC} > 1.5$ ;  $q\text{-value} < 0.05$ ) from *gluteus medius* skeletal  
1170 muscle expression profiles of fasting (*AL-T0*, N = 11) and fed (*AL-T2*, N = 12) Duroc  
1171 gilts. Results show the change in enrichment significance when incorporating context-  
1172 based pruning of miRNA binding sites of type 8mer, 7mer-m8 and 7mer-A1. R: Raw  
1173 enrichment analyses without any additional context-based pruning. AU: Enrichment

1174 analyses removing miRNA binding sites without AU-rich flanking sequences (30 nts  
1175 upstream and downstream). M: Enrichment analyses removing miRNA binding sites  
1176 located in the middle of the 3'-UTR sequence (45-55%). E: Enrichment analyses  
1177 removing miRNA binding sites located too close (< 15 nts) to the beginning or the end of  
1178 the 3'-UTR sequences. The black dashed line represents a  $P$ -value = 0.05.
